# Supplementary material for: Bacterial Contamination of Healthcare Students’ Mobile Phones: Impact of Specific Absorption Rate (SAR), Users’ Demographics and Device Characteristics on Bacterial Load
Source: MDPI journal article supplement (doi:10.3390/life13061349), 2023-06-08

# BACTERIAL CONTAMINATION OF HEALTHCARE STUDENTS' MOBILE PHONES: IMPACT OF SPECIFIC ABSORPTION RATE (SAR), USERS' DEMOGRAPHICS AND DEVICE CHARACTERISTICS ON BACTERIAL CHARGES.

Maurici M, Pica F, D'Alò GL, Cicciarella Modica D, Distefano A, Gorjao M, Simonelli MS, Serafinelli L, De Filippis P.

## Supplementary Material

### Table of contents

|                                                                                                                                                                      |    |
|----------------------------------------------------------------------------------------------------------------------------------------------------------------------|----|
| TABLE S1: FULL RESULTS FOR HPC AT 37 °C, HPC 22 °C, GRAM NEGATIVE ORGANISMS OR ENTERICS, ENTEROCOCCI AND STAPHYLOCOCCI IN RELATION TO QUESTIONNAIRE' VARIABLES. .... | 3  |
| RADAR PLOTS SHOWING THE BACTERIAL CHARGES ACROSS THE 15 SELECTED USER'S DEMOGRAPHICS AND DEVICES CHARACTERISTICS.....                                                | 8  |
| FIGURE S1: RADAR PLOT FOR GENDER.....                                                                                                                                | 8  |
| FIGURE S2: RADAR PLOT FOR USER'S AGE.....                                                                                                                            | 8  |
| FIGURE S3: RADAR PLOT FOR PLACE OF TRAINING.....                                                                                                                     | 9  |
| FIGURE S4: RADAR PLOT FOR TRAINING FREQUENCY.....                                                                                                                    | 9  |
| FIGURE S5: RADAR PLOT FOR EUROPEAN HEAD SAR.....                                                                                                                     | 10 |
| FIGURE S6: RADAR PLOT FOR SMARTPHONE AGE.....                                                                                                                        | 10 |
| FIGURE S7: RADAR PLOT FOR COVER TYPE.....                                                                                                                            | 11 |
| FIGURE S8: RADAR PLOT FOR SCREEN PROTECTOR.....                                                                                                                      | 11 |
| FIGURE S9: RADAR PLOT FOR HEALTH STATUS.....                                                                                                                         | 12 |
| FIGURE S10: RADAR PLOT FOR CLEANING FREQUENCY.....                                                                                                                   | 12 |
| FIGURE S11: RADAR PLOT FOR CLEANING METHOD.....                                                                                                                      | 13 |
| FIGURE S12: RADAR PLOT FOR LAST CLEANING.....                                                                                                                        | 13 |
| FIGURE S13: RADAR PLOT FOR USE WITH GLOVES.....                                                                                                                      | 14 |
| FIGURE S14: RADAR PLOT FOR USUAL MEANS OF TRANSPORT.....                                                                                                             | 14 |
| FIGURE S15: RADAR PLOT FOR MEANS OF TRANSPORT IN THE DAY OF SAMPLING.....                                                                                            | 15 |

## SCATTER PLOTS COMPARING MEAN HPCS 37 °C AND HPCS 22 °C ACROSS THE SELECTED VARIABLES ..... 16

|                                                                                                |    |
|------------------------------------------------------------------------------------------------|----|
| FIGURE S16: HPCS 37 °C AND HPCS 22 °C BASED ON AGE .....                                       | 16 |
| FIGURE S17: HPCS 37 °C AND HPCS 22 °C BASED ON CLEANING FREQUENCY .....                        | 17 |
| FIGURE S18: HPCS 37 °C AND HPCS 22 °C BASED ON CLEANING METHOD .....                           | 18 |
| FIGURE S19: HPCS 37 °C AND HPCS 22 °C BASED ON COVER TYPE .....                                | 19 |
| FIGURE S20: HPCS 37 °C AND HPCS 22 °C BASED ON EUROPEAN HEAD SAR (W/KG) .....                  | 20 |
| FIGURE S21: HPCS 37 °C AND HPCS 22 °C BASED ON GENDER .....                                    | 21 |
| FIGURE S22: HPCS 37 °C AND HPCS 22 °C BASED ON HEALTH STATUS .....                             | 22 |
| FIGURE S23: HPCS 37 °C AND HPCS 22 °C BASED ON LAST CLEANING.....                              | 23 |
| FIGURE S24: HPCS 37 °C AND HPCS 22 °C BASED ON MEANS OF TRANSPORT IN THE DAY OF SAMPLING ..... | 24 |
| FIGURE S25: HPCS 37 °C AND HPCS 22 °C BASED ON PLACE OF TRAINING .....                         | 25 |
| FIGURE S26: HPCS 37 °C AND HPCS 22 °C BASED ON SCREEN PROTECTOR .....                          | 26 |
| FIGURE S27: HPCS 37 °C AND HPCS 22 °C BASED ON SMARTPHONE AGE.....                             | 27 |
| FIGURE S28: HPCS 37 °C AND HPCS 22 °C BASED ON TRAINING FREQUENCY .....                        | 28 |
| FIGURE S29: HPCS 37 °C AND HPCS 22 °C BASED ON USE WITH GLOVES .....                           | 29 |
| FIGURE S30: HPCS 37 °C AND HPCS 22 °C BASED ON USUAL MEAN OF TRANSPORT .....                   | 30 |

## SCATTER PLOTS COMPARING MEAN STAPHYLOCOCCI AND ENTEROCOCCI CHARGES ACROSS THE SELECTED VARIABLES..... 31

|                                                                                                                 |    |
|-----------------------------------------------------------------------------------------------------------------|----|
| FIGURE S31: MEAN STAPHYLOCOCCI AND ENTEROCOCCI CHARGES BASED ON AGE .....                                       | 31 |
| FIGURE S32: MEAN STAPHYLOCOCCI AND ENTEROCOCCI CHARGES BASED ON CLEANING FREQUENCY .....                        | 32 |
| FIGURE S33: MEAN STAPHYLOCOCCI AND ENTEROCOCCI CHARGES BASED ON CLEANING METHOD .....                           | 33 |
| FIGURE S34: MEAN STAPHYLOCOCCI AND ENTEROCOCCI CHARGES BASED ON COVER TYPE .....                                | 34 |
| FIGURE S35: MEAN STAPHYLOCOCCI AND ENTEROCOCCI CHARGES BASED ON EUROPEAN HEAD SAR.....                          | 35 |
| FIGURE S36: MEAN STAPHYLOCOCCI AND ENTEROCOCCI CHARGES BASED ON GENDER .....                                    | 36 |
| FIGURE S37: MEAN STAPHYLOCOCCI AND ENTEROCOCCI CHARGES BASED ON HEALTH STATUS .....                             | 37 |
| FIGURE S38: MEAN STAPHYLOCOCCI AND ENTEROCOCCI CHARGES BASED ON LAST CLEANING .....                             | 38 |
| FIGURE S39: MEAN STAPHYLOCOCCI AND ENTEROCOCCI CHARGES BASED ON MEANS OF TRANSPORT IN THE DAY OF SAMPLING ..... | 39 |
| FIGURE S40: MEAN STAPHYLOCOCCI AND ENTEROCOCCI CHARGES BASED ON PLACE OF TRAINING .....                         | 40 |
| FIGURE S41: MEAN STAPHYLOCOCCI AND ENTEROCOCCI CHARGES BASED ON SCREEN PROTECTOR .....                          | 41 |
| FIGURE S42: MEAN STAPHYLOCOCCI AND ENTEROCOCCI CHARGES BASED ON SMARTPHONE AGE .....                            | 42 |
| FIGURE S43: MEAN STAPHYLOCOCCI AND ENTEROCOCCI CHARGES BASED ON TRAINING FREQUENCY.....                         | 43 |
| FIGURE S44: MEAN STAPHYLOCOCCI AND ENTEROCOCCI CHARGES BASED ON USE WITH GLOVES.....                            | 44 |
| FIGURE S45: MEAN STAPHYLOCOCCI AND ENTEROCOCCI CHARGES BASED ON USUAL MEAN OF TRANSPORT .....                   | 45 |

**Table S1: Full results for HPC at 37 °C, HPC 22 °C, Gram negative organisms or enterics, Enterococci and Staphylococci in relation to questionnaire' variables.**

|                            |                                  |               | HPC 37°C<br>(CFU/dm <sup>2</sup> ) | HPC 22°C<br>(CFU/dm <sup>2</sup> ) | Gram<br>negative<br>(CFU/dm <sup>2</sup> ) | Enterococci<br>(CFU/dm <sup>2</sup> ) | Staphylococci<br>(CFU/dm <sup>2</sup> ) |
|----------------------------|----------------------------------|---------------|------------------------------------|------------------------------------|--------------------------------------------|---------------------------------------|-----------------------------------------|
| <b>Whole sample</b>        | <b>(n=83)</b>                    | <b>Mean</b>   | 411                                | 247                                | 5                                          | 82                                    | 432                                     |
|                            |                                  | <b>Median</b> | 253                                | 100                                | 0                                          | 19                                    | 238                                     |
|                            |                                  | <b>SD</b>     | 466                                | 396                                | 19                                         | 169                                   | 504                                     |
|                            |                                  | <b>Q1</b>     | 88                                 | 42                                 | 0                                          | 0                                     | 60                                      |
|                            |                                  | <b>Q3</b>     | 589                                | 302                                | 0                                          | 65                                    | 562                                     |
| <b>Gender</b>              | <b>Female<br/>(n=65)</b>         | <b>Mean</b>   | 391                                | 235                                | 6                                          | 82                                    | 420                                     |
|                            |                                  | <b>Median</b> | 274                                | 83                                 | 0                                          | 18                                    | 238                                     |
|                            |                                  | <b>SD</b>     | 442                                | 402                                | 22                                         | 175                                   | 499                                     |
|                            |                                  | <b>Q1</b>     | 105                                | 26                                 | 0                                          | 0                                     | 62                                      |
|                            |                                  | <b>Q3</b>     | 522                                | 296                                | 0                                          | 66                                    | 536                                     |
|                            | <b>Male<br/>(n=18)</b>           | <b>Mean</b>   | 485                                | 292                                | 2                                          | 84                                    | 476                                     |
|                            |                                  | <b>Median</b> | 214                                | 106                                | 0                                          | 28                                    | 221                                     |
|                            |                                  | <b>SD</b>     | 553                                | 380                                | 4                                          | 151                                   | 530                                     |
|                            |                                  | <b>Q1</b>     | 76                                 | 71                                 | 0                                          | 0                                     | 57                                      |
|                            |                                  | <b>Q3</b>     | 888                                | 335                                | 0                                          | 57                                    | 858                                     |
| <b>Age (mean = 21,29y)</b> | <b>Below average<br/>(n=65)</b>  | <b>Mean</b>   | 407                                | 231                                | 5                                          | 90                                    | 426                                     |
|                            |                                  | <b>Median</b> | 228                                | 83                                 | 0                                          | 25                                    | 238                                     |
|                            |                                  | <b>SD</b>     | 475                                | 364                                | 21                                         | 185                                   | 479                                     |
|                            |                                  | <b>Q1</b>     | 88                                 | 26                                 | 0                                          | 0                                     | 60                                      |
|                            |                                  | <b>Q3</b>     | 555                                | 296                                | 0                                          | 61                                    | 567                                     |
|                            | <b>Above average<br/>(n=18)</b>  | <b>Mean</b>   | 427                                | 305                                | 3                                          | 55                                    | 453                                     |
|                            |                                  | <b>Median</b> | 320                                | 152                                | 0                                          | 16                                    | 222                                     |
|                            |                                  | <b>SD</b>     | 443                                | 503                                | 13                                         | 89                                    | 600                                     |
|                            |                                  | <b>Q1</b>     | 118                                | 69                                 | 0                                          | 0                                     | 50                                      |
|                            |                                  | <b>Q3</b>     | 630                                | 351                                | 0                                          | 92                                    | 578                                     |
| <b>Study course</b>        | <b>Nursing<br/>(n=59)</b>        | <b>Mean</b>   | 385                                | 265                                | 5                                          | 95                                    | 416                                     |
|                            |                                  | <b>Median</b> | 206                                | 112                                | 0                                          | 19                                    | 213                                     |
|                            |                                  | <b>SD</b>     | 479                                | 374                                | 22                                         | 191                                   | 506                                     |
|                            |                                  | <b>Q1</b>     | 88                                 | 54                                 | 0                                          | 0                                     | 60                                      |
|                            |                                  | <b>Q3</b>     | 462                                | 352                                | 0                                          | 70                                    | 530                                     |
|                            | <b>Obstetrics<br/>n=(13)</b>     | <b>Mean</b>   | 369                                | 97                                 | 1                                          | 54                                    | 323                                     |
|                            |                                  | <b>Median</b> | 321                                | 43                                 | 0                                          | 18                                    | 301                                     |
|                            |                                  | <b>SD</b>     | 284                                | 128                                | 2                                          | 90                                    | 284                                     |
|                            |                                  | <b>Q1</b>     | 163                                | 18                                 | 0                                          | 0                                     | 38                                      |
|                            |                                  | <b>Q3</b>     | 607                                | 140                                | 0                                          | 53                                    | 509                                     |
|                            | <b>Other<br/>(n=11)</b>          | <b>Mean</b>   | 599                                | 331                                | 7                                          | 50                                    | 645                                     |
|                            |                                  | <b>Median</b> | 595                                | 82                                 | 0                                          | 19                                    | 405                                     |
|                            |                                  | <b>SD</b>     | 554                                | 644                                | 16                                         | 93                                    | 658                                     |
|                            |                                  | <b>Q1</b>     | 77                                 | 32                                 | 0                                          | 0                                     | 95                                      |
|                            |                                  | <b>Q3</b>     | 867                                | 338                                | 9                                          | 43                                    | 1051                                    |
| <b>Place of training</b>   | <b>Ambulatory care<br/>(n=3)</b> | <b>Mean</b>   | 255                                | 43                                 | 0                                          | 11                                    | 88                                      |
|                            |                                  | <b>Median</b> | 77                                 | 42                                 | 0                                          | 0                                     | 95                                      |
|                            |                                  | <b>SD</b>     | 338                                | 32                                 | 0                                          | 20                                    | 49                                      |
|                            |                                  | <b>Q1</b>     | 44                                 | 11                                 | 0                                          | 0                                     | 35                                      |
|                            |                                  | <b>Q3</b>     |                                    |                                    | 0                                          |                                       |                                         |
|                            | <b>Medical Unit</b>              | <b>Mean</b>   | 482                                | 305                                | 10                                         | 122                                   | 490                                     |

|                                     |                                  |               |      |     |    |     |      |
|-------------------------------------|----------------------------------|---------------|------|-----|----|-----|------|
| <b>Training frequency</b>           | <b>(n=33)</b>                    | <b>Median</b> | 281  | 121 | 0  | 30  | 287  |
|                                     |                                  | <b>SD</b>     | 538  | 488 | 30 | 230 | 553  |
|                                     |                                  | <b>Q1</b>     | 116  | 56  | 0  | 0   | 49   |
|                                     |                                  | <b>Q3</b>     | 798  | 354 | 8  | 89  | 779  |
|                                     |                                  |               |      |     |    |     |      |
|                                     | <b>Surgical Unit (n=43)</b>      | <b>Mean</b>   | 371  | 216 | 1  | 55  | 408  |
|                                     |                                  | <b>Median</b> | 228  | 95  | 0  | 17  | 292  |
|                                     |                                  | <b>SD</b>     | 423  | 326 | 4  | 104 | 472  |
|                                     |                                  | <b>Q1</b>     | 88   | 43  | 0  | 0   | 60   |
|                                     |                                  | <b>Q3</b>     | 520  | 293 | 0  | 44  | 530  |
|                                     | <b>Intensive care (n=2)</b>      | <b>Mean</b>   | 279  | 66  | 0  | 40  | 179  |
|                                     |                                  | <b>Median</b> | 279  | 66  | 0  | 40  | 179  |
|                                     |                                  | <b>SD</b>     | 112  | 65  | 0  | 42  | 83   |
|                                     |                                  | <b>Q1</b>     | 200  | 20  | 0  | 11  | 120  |
|                                     |                                  | <b>Q3</b>     | .    | .   | 0  | .   | .    |
|                                     | <b>1 to 3 days/week (n=4)</b>    | <b>Mean</b>   | 607  | 224 | 3  | 28  | 922  |
|                                     |                                  | <b>Median</b> | 703  | 219 | 0  | 12  | 942  |
|                                     |                                  | <b>SD</b>     | 388  | 196 | 5  | 40  | 701  |
|                                     |                                  | <b>Q1</b>     | 200  | 40  | 0  | 3   | 246  |
|                                     |                                  | <b>Q3</b>     | 919  | 413 | 8  | 68  | 1577 |
|                                     | <b>4 to 5 days/week (n=14)</b>   | <b>Mean</b>   | 393  | 230 | 4  | 56  | 344  |
|                                     |                                  | <b>Median</b> | 272  | 58  | 0  | 19  | 210  |
|                                     |                                  | <b>SD</b>     | 506  | 579 | 14 | 106 | 474  |
|                                     |                                  | <b>Q1</b>     | 67   | 17  | 0  | 0   | 55   |
|                                     |                                  | <b>Q3</b>     | 506  | 151 | 0  | 37  | 446  |
|                                     | <b>6 to 7 days/week (n=64)</b>   | <b>Mean</b>   | 394  | 243 | 5  | 88  | 406  |
|                                     |                                  | <b>Median</b> | 225  | 110 | 0  | 18  | 227  |
|                                     |                                  | <b>SD</b>     | 464  | 356 | 21 | 182 | 478  |
|                                     |                                  | <b>Q1</b>     | 91   | 49  | 0  | 0   | 51   |
|                                     |                                  | <b>Q3</b>     | 509  | 314 | 0  | 66  | 521  |
| <b>Smartphone age (mean 18,78m)</b> | <b>Below average (n=45)</b>      | <b>Mean</b>   | 385  | 246 | 7  | 94  | 359  |
|                                     |                                  | <b>Median</b> | 156  | 82  | 0  | 14  | 152  |
|                                     |                                  | <b>SD</b>     | 504  | 442 | 26 | 201 | 459  |
|                                     |                                  | <b>Q1</b>     | 76   | 29  | 0  | 0   | 34   |
|                                     |                                  | <b>Q3</b>     | 497  | 257 | 0  | 50  | 506  |
|                                     | <b>Above average (n=38)</b>      | <b>Mean</b>   | 443  | 249 | 2  | 69  | 518  |
|                                     |                                  | <b>Median</b> | 294  | 118 | 0  | 24  | 302  |
|                                     |                                  | <b>SD</b>     | 421  | 339 | 5  | 122 | 546  |
|                                     |                                  | <b>Q1</b>     | 169  | 44  | 0  | 10  | 148  |
|                                     |                                  | <b>Q3</b>     | 602  | 343 | 0  | 67  | 683  |
| <b>Cleaning method</b>              | <b>No cleaning method (n=11)</b> | <b>Mean</b>   | 630  | 378 | 16 | 152 | 470  |
|                                     |                                  | <b>Median</b> | 144  | 78  | 0  | 0   | 92   |
|                                     |                                  | <b>SD</b>     | 774  | 639 | 49 | 333 | 662  |
|                                     |                                  | <b>Q1</b>     | 63   | 11  | 0  | 0   | 33   |
|                                     |                                  | <b>Q3</b>     | 1552 | 552 | 8  | 91  | 804  |
|                                     | <b>Disinfectants (n=27)</b>      | <b>Mean</b>   | 322  | 206 | 5  | 65  | 358  |
|                                     |                                  | <b>Median</b> | 222  | 75  | 0  | 18  | 158  |
|                                     |                                  | <b>SD</b>     | 396  | 443 | 12 | 113 | 515  |
|                                     |                                  | <b>Q1</b>     | 77   | 18  | 0  | 0   | 29   |
|                                     |                                  | <b>Q3</b>     | 383  | 166 | 0  | 43  | 417  |
|                                     | <b>Water (n=26)</b>              | <b>Mean</b>   | 398  | 248 | 0  | 64  | 525  |
|                                     |                                  | <b>Median</b> | 291  | 120 | 0  | 16  | 320  |
|                                     |                                  | <b>SD</b>     | 362  | 272 | 2  | 119 | 505  |
|                                     |                                  | <b>Q1</b>     | 132  | 54  | 0  | 7   | 155  |
|                                     |                                  | <b>Q3</b>     | 662  | 344 | 0  | 57  | 832  |
|                                     | <b>Dry towel</b>                 | <b>Mean</b>   | 429  | 230 | 3  | 92  | 387  |

|                    |                                  |        |      |      |      |      |      |
|--------------------|----------------------------------|--------|------|------|------|------|------|
|                    | (n=19)                           | Median | 281  | 114  | 0    | 32   | 303  |
|                    |                                  | SD     | 453  | 296  | 8    | 162  | 389  |
|                    |                                  | Q1     | 77   | 61   | 0    | 0    | 133  |
|                    |                                  | Q3     | 589  | 357  | 0    | 108  | 481  |
| Cleaning frequency | Daily to weekly cleaning (n=20)  | Mean   | 442  | 270  | 7    | 84   | 401  |
|                    |                                  | Median | 349  | 119  | 0    | 23   | 319  |
|                    |                                  | SD     | 441  | 480  | 15   | 147  | 420  |
|                    |                                  | Q1     | 101  | 56   | 0    | 0    | 80   |
|                    |                                  | Q3     | 600  | 333  | 6    | 81   | 531  |
|                    | Weekly to yearly cleaning (n=47) | Mean   | 367  | 228  | 2    | 73   | 450  |
|                    |                                  | Median | 217  | 114  | 0    | 25   | 227  |
|                    |                                  | SD     | 397  | 294  | 4    | 126  | 524  |
|                    |                                  | Q1     | 100  | 43   | 0    | 0    | 60   |
|                    |                                  | Q3     | 589  | 302  | 0    | 66   | 571  |
|                    | Less than yearly cleaning (n=16) | Mean   | 502  | 275  | 11   | 108  | 419  |
|                    |                                  | Median | 227  | 58   | 0    | 10   | 98   |
|                    |                                  | SD     | 664  | 545  | 40   | 280  | 564  |
|                    |                                  | Q1     | 64   | 20   | 0    | 0    | 34   |
|                    |                                  | Q3     | 731  | 106  | 0    | 44   | 648  |
| Last cleaning      | Never so far (n=11)              | Mean   | 630  | 378  | 16   | 152  | 470  |
|                    |                                  | Median | 144  | 78   | 0    | 0    | 92   |
|                    |                                  | SD     | 774  | 639  | 49   | 333  | 662  |
|                    |                                  | Q1     | 63   | 11   | 0    | 0    | 33   |
|                    |                                  | Q3     | 1552 | 552  | 8    | 91   | 804  |
|                    | 1 day to 1 week before (n=24)    | Mean   | 388  | 236  | 6    | 73   | 376  |
|                    |                                  | Median | 314  | 109  | 0    | 19   | 282  |
|                    |                                  | SD     | 429  | 444  | 14   | 136  | 406  |
|                    |                                  | Q1     | 71   | 38   | 0    | 0    | 56   |
|                    |                                  | Q3     | 511  | 313  | 6    | 62   | 531  |
|                    | 1 week to 1 year before (n=41)   | Mean   | 391  | 242  | 1    | 79   | 470  |
|                    |                                  | Median | 244  | 114  | 0    | 30   | 287  |
|                    |                                  | SD     | 402  | 303  | 4    | 131  | 535  |
|                    |                                  | Q1     | 109  | 43   | 0    | 10   | 95   |
|                    |                                  | Q3     | 590  | 357  | 0    | 70   | 571  |
|                    | 1 year of more before (n=5)      | Mean   | 217  | 56   | 0    | 7    | 286  |
|                    |                                  | Median | 284  | 47   | 0    | 9    | 213  |
|                    |                                  | SD     | 116  | 35   | 0    | 6    | 296  |
|                    |                                  | Q1     | 102  | 31   | 0    | 0    | 15   |
|                    |                                  | Q3     | 299  | 84   | 0    | 12   | 594  |
| Cover type         | No case/cover (n=7)              | Mean   | 338  | 235  | 1    | 78   | 401  |
|                    |                                  | Median | 312  | 32   | 0    | 0    | 405  |
|                    |                                  | SD     | 323  | 322  | 3    | 132  | 480  |
|                    |                                  | Q1     | 44   | 11   | 0    | 0    | 35   |
|                    |                                  | Q3     | 524  | 389  | 0    | 150  | 494  |
|                    | Flip-Cover (n=3)                 | Mean   | 600  | 187  | 3    | 46   | 741  |
|                    |                                  | Median | 520  | 69   | 0    | 32   | 804  |
|                    |                                  | SD     | 322  | 218  | 5    | 40   | 346  |
|                    |                                  | Q1     | 326  | 54   | 0    | 14   | 368  |
|                    |                                  | Q3     | n.d. | n.d. | n.d. | n.d. | n.d. |
|                    | Case (n=73)                      | Mean   | 410  | 251  | 5    | 84   | 422  |
|                    |                                  | Median | 228  | 105  | 0    | 19   | 227  |

|                                           |                                                 |        |      |      |      |      |      |     |
|-------------------------------------------|-------------------------------------------------|--------|------|------|------|------|------|-----|
|                                           |                                                 |        | SD   | 483  | 410  | 21   | 176  | 512 |
|                                           |                                                 |        | Q1   | 88   | 44   | 0    | 0    | 60  |
|                                           |                                                 |        | Q3   | 590  | 296  | 0    | 61   | 553 |
| Screen protector                          | No screen protector (n=31)                      | Mean   | 376  | 252  | 4    | 57   | 370  |     |
|                                           |                                                 | Median | 222  | 100  | 0    | 10   | 227  |     |
|                                           |                                                 | SD     | 459  | 436  | 12   | 110  | 451  |     |
|                                           |                                                 | Q1     | 75   | 61   | 0    | 0    | 40   |     |
|                                           |                                                 | Q3     | 383  | 289  | 0    | 44   | 481  |     |
|                                           | Tempered glass (n=35)                           | Mean   | 431  | 247  | 7    | 100  | 436  |     |
|                                           |                                                 | Median | 284  | 83   | 0    | 14   | 213  |     |
|                                           |                                                 | SD     | 487  | 402  | 28   | 220  | 517  |     |
|                                           |                                                 | Q1     | 88   | 42   | 0    | 0    | 76   |     |
|                                           |                                                 | Q3     | 595  | 302  | 0    | 70   | 562  |     |
|                                           | Plastic film (n=17)                             | Mean   | 435  | 239  | 1    | 92   | 538  |     |
|                                           |                                                 | Median | 321  | 118  | 0    | 30   | 310  |     |
|                                           |                                                 | SD     | 458  | 323  | 3    | 137  | 576  |     |
|                                           |                                                 | Q1     | 94   | 18   | 0    | 10   | 151  |     |
|                                           |                                                 | Q3     | 589  | 371  | 0    | 127  | 832  |     |
| Usual means of transport                  | Usually - Public transport (n=35)               | Mean   | 519  | 348  | 3    | 84   | 573  |     |
|                                           |                                                 | Median | 312  | 189  | 0    | 29   | 329  |     |
|                                           |                                                 | SD     | 517  | 474  | 9    | 135  | 591  |     |
|                                           |                                                 | Q1     | 132  | 43   | 0    | 0    | 132  |     |
|                                           |                                                 | Q3     | 867  | 438  | 0    | 87   | 833  |     |
|                                           | Usually - Private transport (n=48)              | Mean   | 332  | 174  | 6    | 82   | 329  |     |
|                                           |                                                 | Median | 214  | 82   | 0    | 14   | 168  |     |
|                                           |                                                 | SD     | 412  | 313  | 24   | 191  | 405  |     |
|                                           |                                                 | Q1     | 75   | 28   | 0    | 0    | 40   |     |
|                                           |                                                 | Q3     | 434  | 161  | 0    | 50   | 469  |     |
| Means of transport in the day of sampling | Today - Public transport (n=28)                 | Mean   | 577  | 392  | 3    | 98   | 600  |     |
|                                           |                                                 | Median | 397  | 212  | 0    | 31   | 339  |     |
|                                           |                                                 | SD     | 559  | 520  | 10   | 155  | 620  |     |
|                                           |                                                 | Q1     | 141  | 58   | 0    | 0    | 107  |     |
|                                           |                                                 | Q3     | 853  | 453  | 0    | 133  | 1015 |     |
|                                           | Today - Private transport (n=53)                | Mean   | 329  | 174  | 5    | 75   | 347  |     |
|                                           |                                                 | Median | 200  | 81   | 0    | 14   | 170  |     |
|                                           |                                                 | SD     | 397  | 299  | 23   | 180  | 420  |     |
|                                           |                                                 | Q1     | 72   | 25   | 0    | 0    | 44   |     |
|                                           |                                                 | Q3     | 409  | 155  | 0    | 44   | 500  |     |
|                                           | Today - Both public and private transport (n=2) | Mean   | 265  | 167  | 4    | 55   | 316  |     |
|                                           |                                                 | Median | 265  | 167  | 4    | 55   | 316  |     |
|                                           |                                                 | SD     | 67   | 191  | 6    | 16   | 126  |     |
|                                           |                                                 | Q1     | 217  | 32   | 0    | 43   | 227  |     |
|                                           |                                                 | Q3     | n.d. | n.d. | n.d. | n.d. | n.d. |     |
| Use with gloves                           | No (n=64)                                       | Mean   | 451  | 264  | 5    | 94   | 449  |     |
|                                           |                                                 | Median | 287  | 83   | 0    | 29   | 296  |     |
|                                           |                                                 | SD     | 501  | 442  | 22   | 179  | 484  |     |
|                                           |                                                 | Q1     | 102  | 28   | 0    | 0    | 95   |     |
|                                           |                                                 | Q3     | 618  | 301  | 0    | 82   | 603  |     |
|                                           | Yes                                             | Mean   | 241  | 233  | 2    | 23   | 428  |     |

|                      |                                             |               |     |     |    |     |     |
|----------------------|---------------------------------------------|---------------|-----|-----|----|-----|-----|
| <b>Health status</b> | <b>(n=10)</b>                               | <b>Median</b> | 143 | 186 | 0  | 10  | 153 |
|                      |                                             | <b>SD</b>     | 234 | 169 | 4  | 43  | 654 |
|                      |                                             | <b>Q1</b>     | 88  | 75  | 0  | 0   | 52  |
|                      |                                             | <b>Q3</b>     | 456 | 391 | 2  | 22  | 630 |
|                      |                                             |               |     |     |    |     |     |
|                      | <b>Yes, changing gloves (n=9)</b>           | <b>Mean</b>   | 314 | 140 | 5  | 68  | 316 |
|                      |                                             | <b>Median</b> | 144 | 105 | 0  | 0   | 79  |
|                      |                                             | <b>SD</b>     | 359 | 136 | 11 | 178 | 504 |
|                      |                                             | <b>Q1</b>     | 61  | 45  | 0  | 0   | 26  |
|                      |                                             | <b>Q3</b>     | 531 | 236 | 5  | 30  | 504 |
|                      | <b>Ill (n=14)</b>                           | <b>Mean</b>   | 520 | 347 | 15 | 168 | 521 |
|                      |                                             | <b>Median</b> | 286 | 82  | 0  | 37  | 258 |
|                      |                                             | <b>SD</b>     | 617 | 538 | 43 | 302 | 523 |
|                      |                                             | <b>Q1</b>     | 104 | 37  | 0  | 7   | 166 |
|                      |                                             | <b>Q3</b>     | 871 | 524 | 9  | 195 | 929 |
|                      | <b>Healthy (n=68)</b>                       | <b>Mean</b>   | 389 | 227 | 3  | 65  | 414 |
|                      |                                             | <b>Median</b> | 228 | 105 | 0  | 14  | 238 |
|                      |                                             | <b>SD</b>     | 431 | 362 | 9  | 123 | 501 |
|                      |                                             | <b>Q1</b>     | 83  | 37  | 0  | 0   | 49  |
|                      |                                             | <b>Q3</b>     | 556 | 300 | 0  | 51  | 536 |
|                      | <b>European Head SAR (Mean = 0.86 W/kg)</b> |               |     |     |    |     |     |
|                      | <b>Above average (n=50)</b>                 | <b>Mean</b>   | 507 | 301 | 6  | 101 | 515 |
|                      |                                             | <b>Median</b> | 294 | 103 | 0  | 26  | 302 |
|                      |                                             | <b>SD</b>     | 531 | 487 | 24 | 199 | 548 |
|                      |                                             | <b>Q1</b>     | 126 | 44  | 0  | 7   | 78  |
|                      |                                             | <b>Q3</b>     | 791 | 341 | 0  | 74  | 811 |
|                      | <b>Below average (n=33)</b>                 | <b>Mean</b>   | 266 | 165 | 2  | 54  | 306 |
|                      |                                             | <b>Median</b> | 170 | 83  | 0  | 10  | 170 |
|                      |                                             | <b>SD</b>     | 296 | 164 | 7  | 104 | 403 |
|                      |                                             | <b>Q1</b>     | 76  | 24  | 0  | 0   | 31  |
|                      |                                             | <b>Q3</b>     | 361 | 296 | 0  | 45  | 458 |

**Radar Plots showing the bacterial charges across the 15 selected user's demographics and devices characteristics**

**Figure S1: Radar plot for Gender**

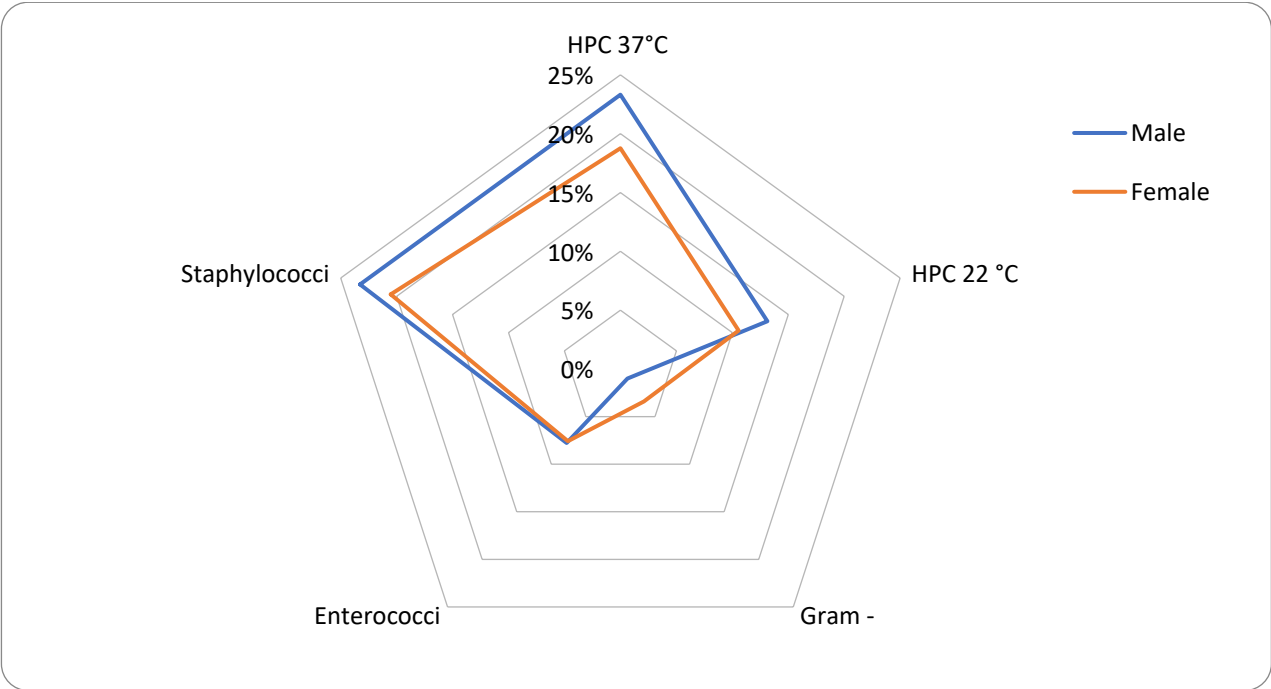

**Figure S2: Radar plot for User's Age**

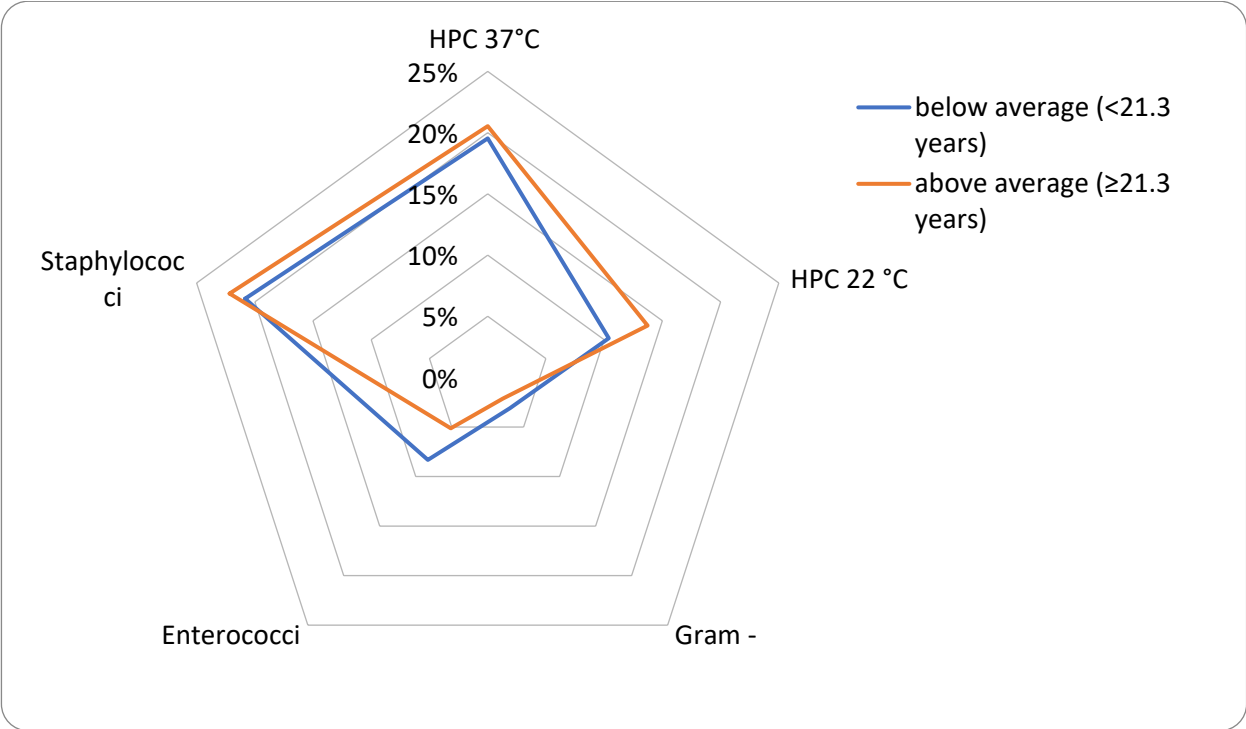



**Figure S3: Radar plot for Place of training**

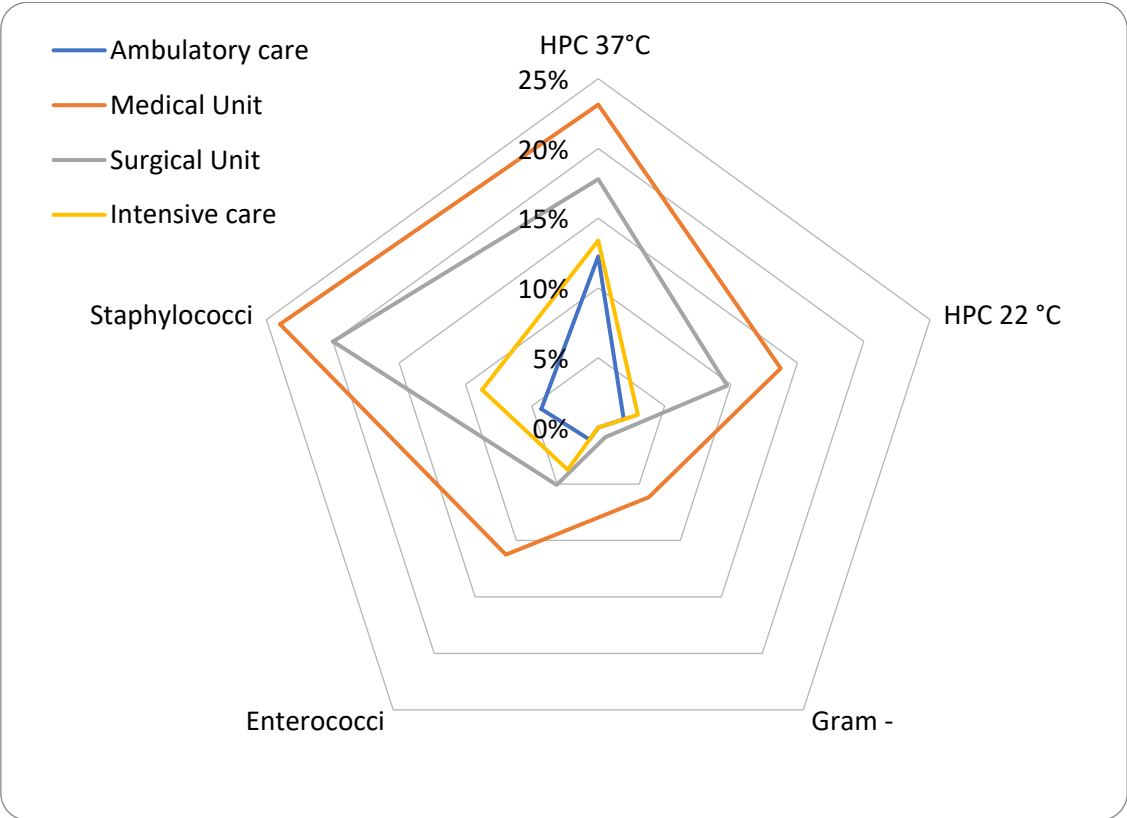

**Figure S4: Radar plot for Training frequency**

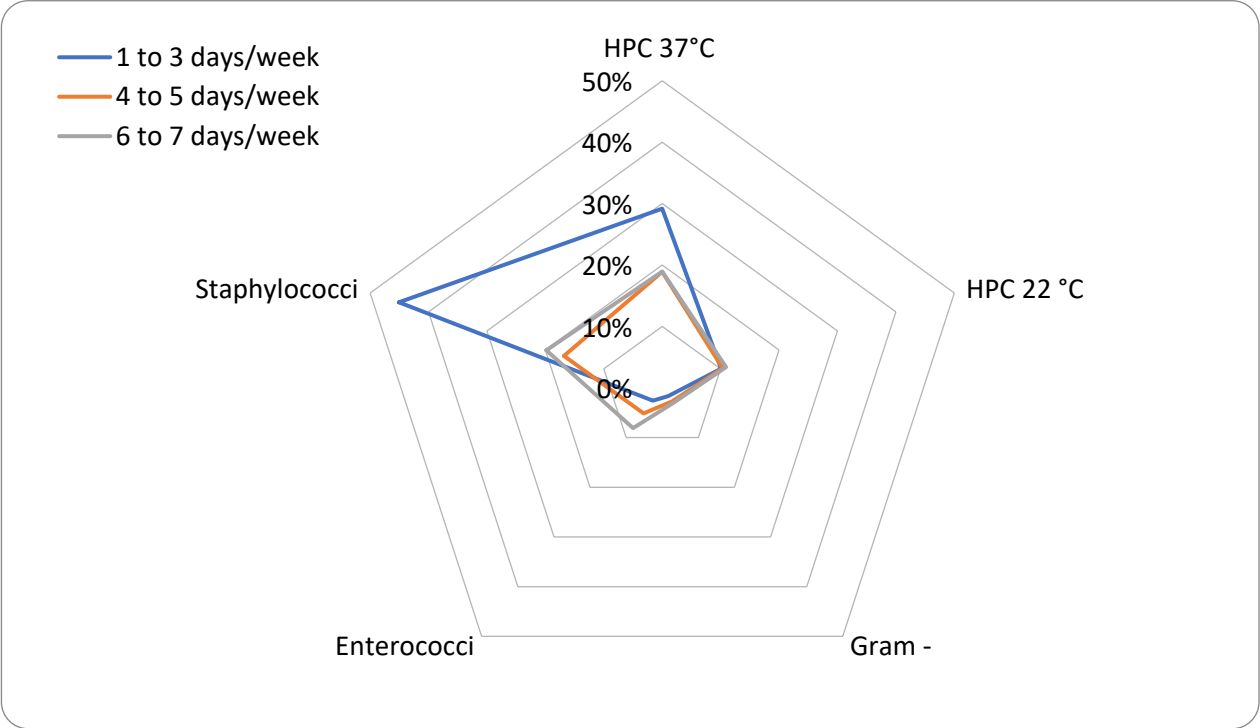

Figure S5: Radar plot for European Head SAR

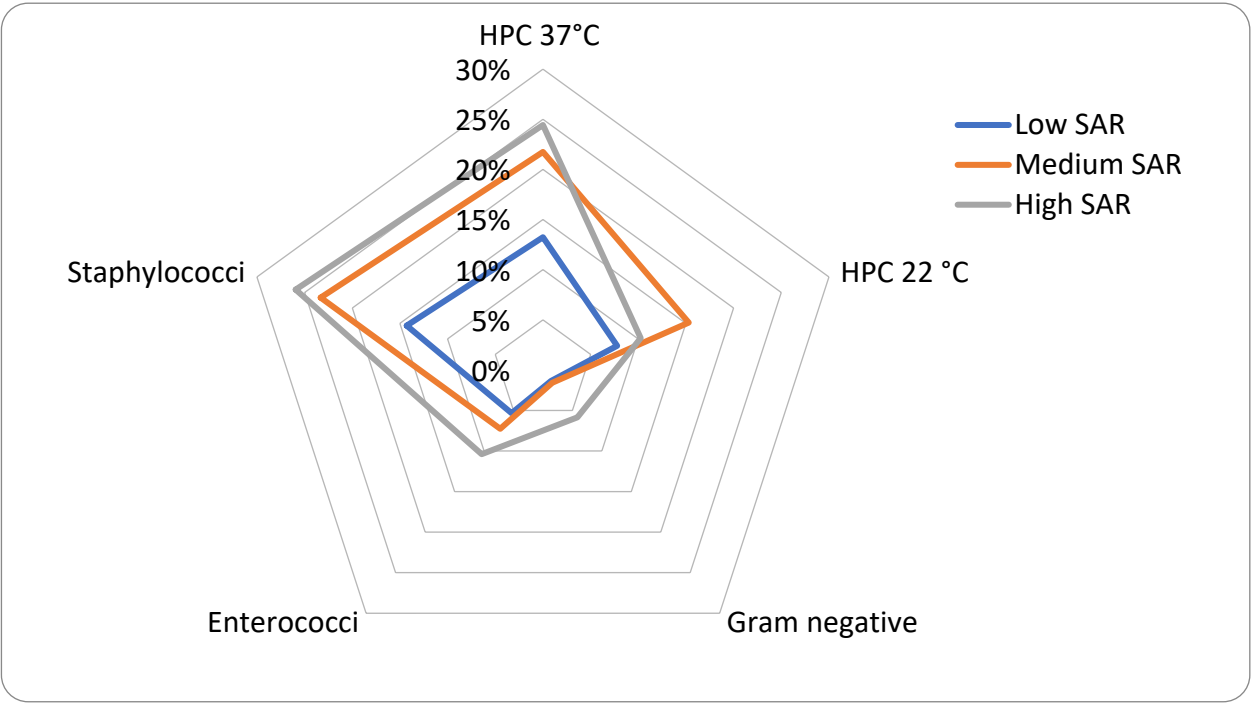

Figure S6: Radar plot for Smartphone age

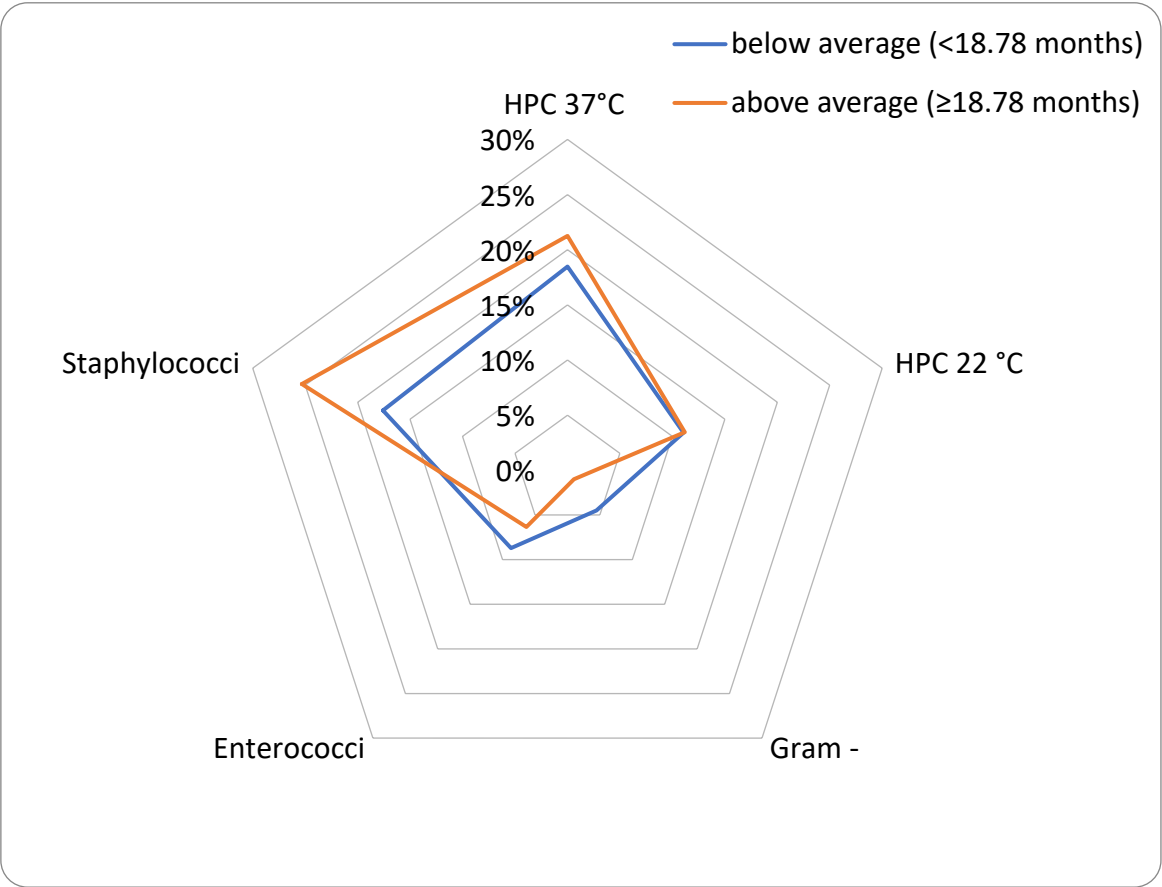

Figure S7: Radar plot for Cover type

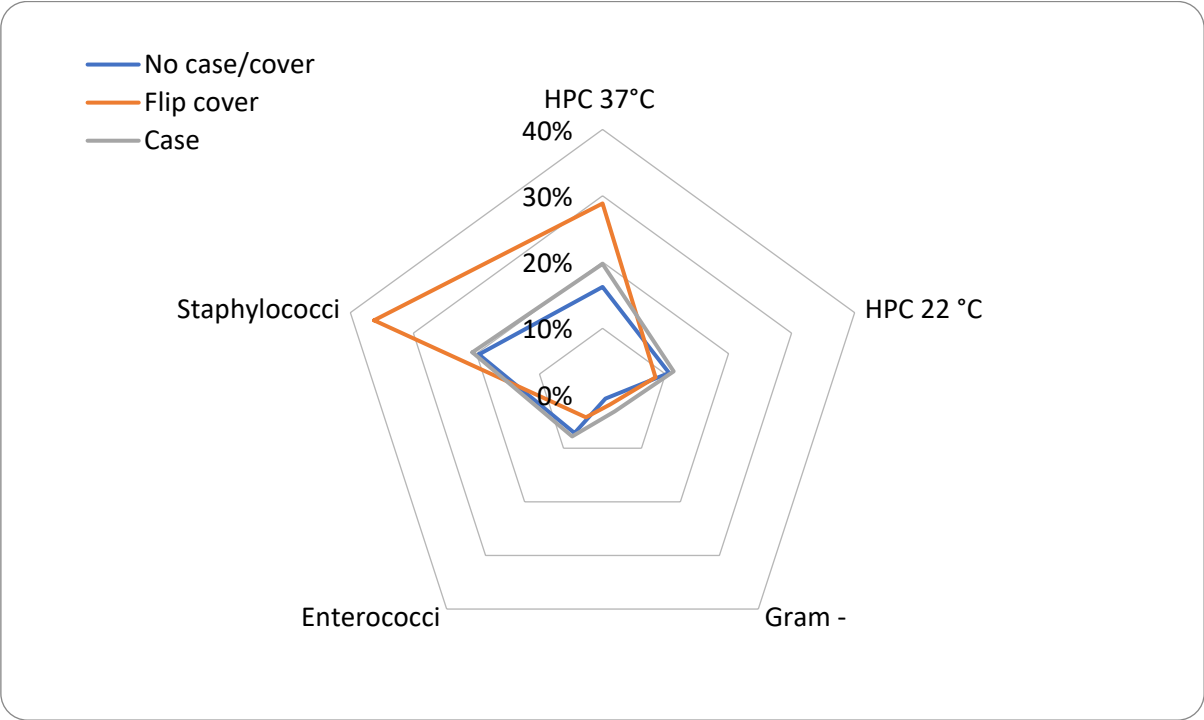

Figure S8: Radar plot for Screen protector

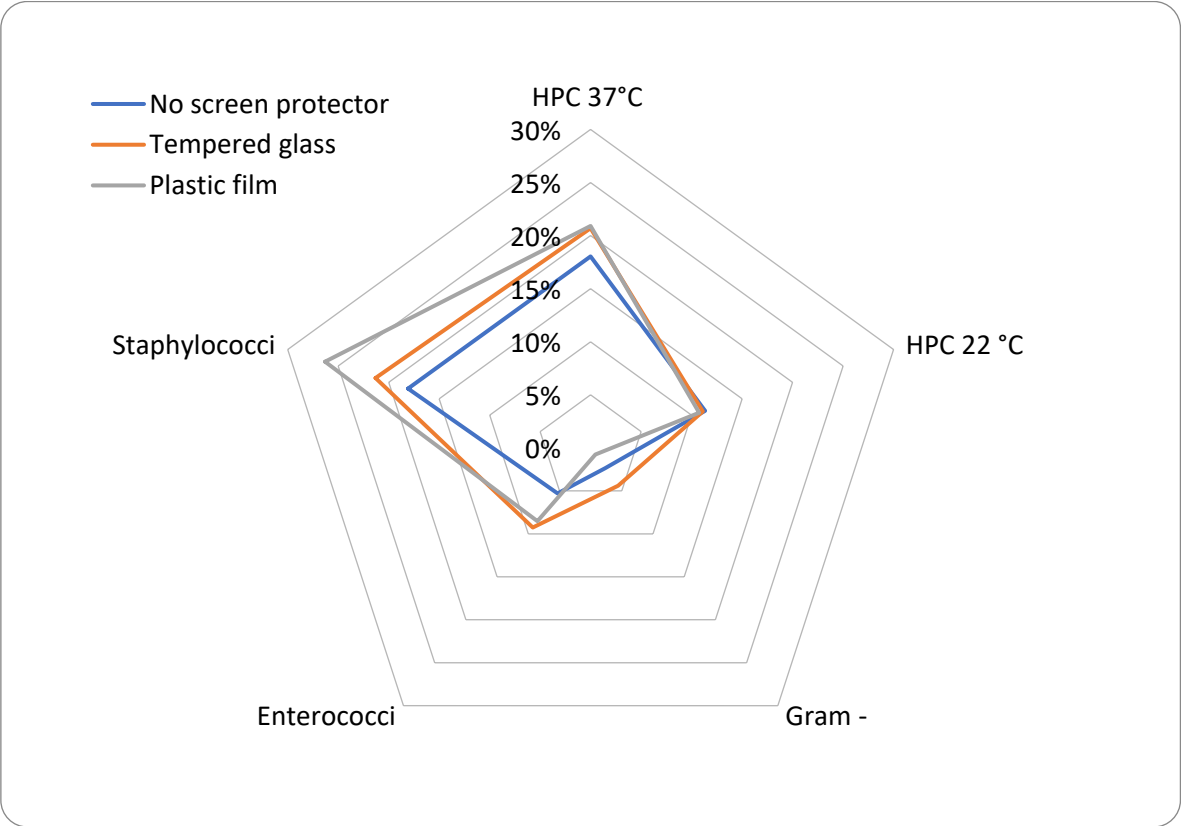

Figure S9: Radar plot for Health status

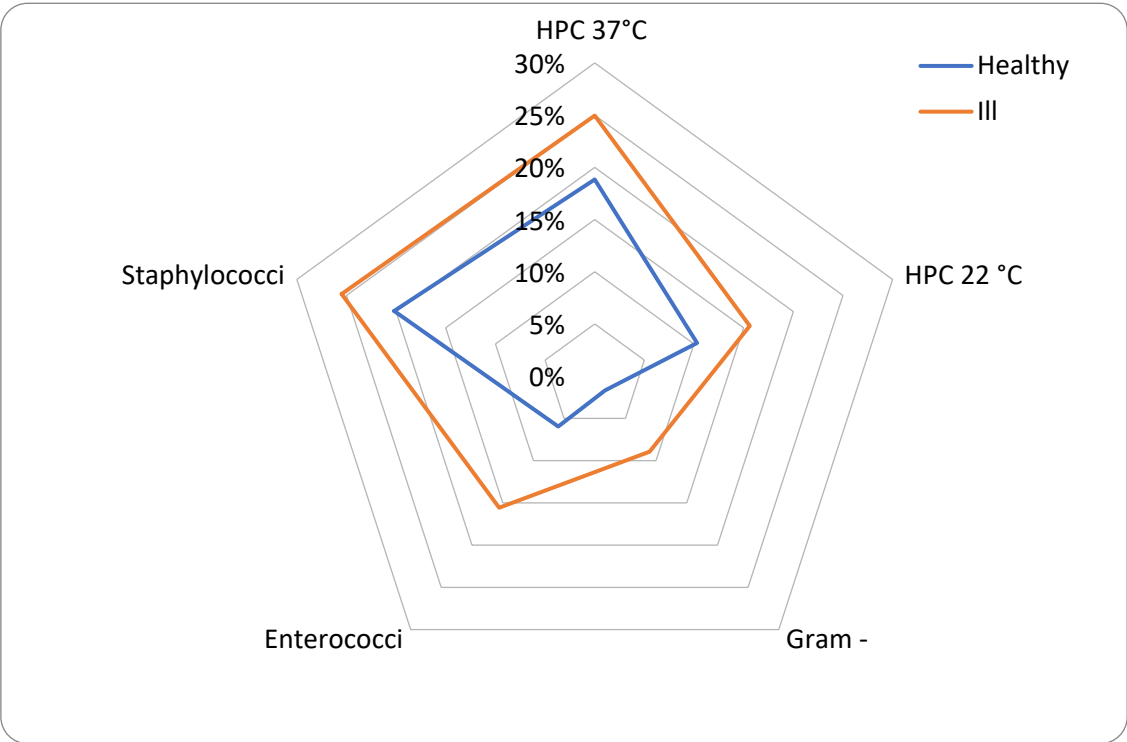

Figure S10: Radar plot for Cleaning frequency

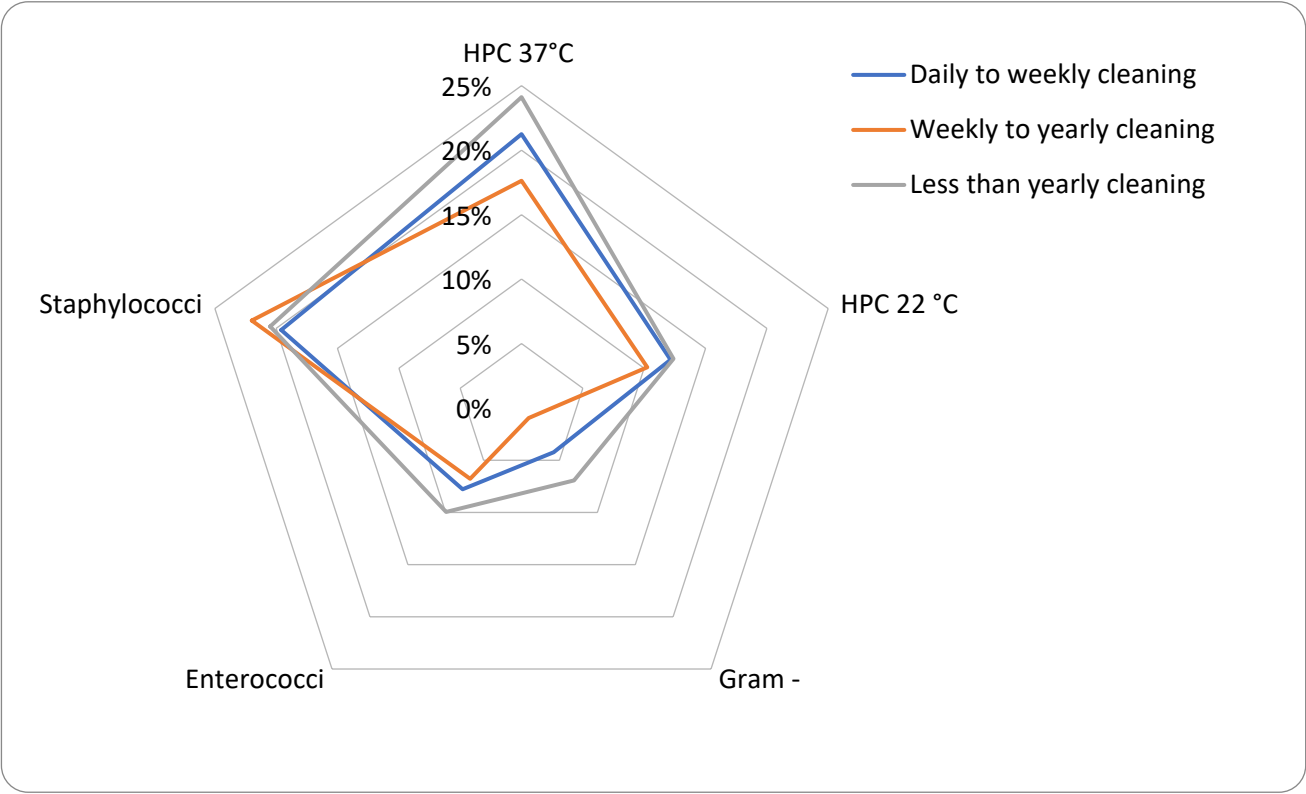

Figure S11: Radar plot for Cleaning method

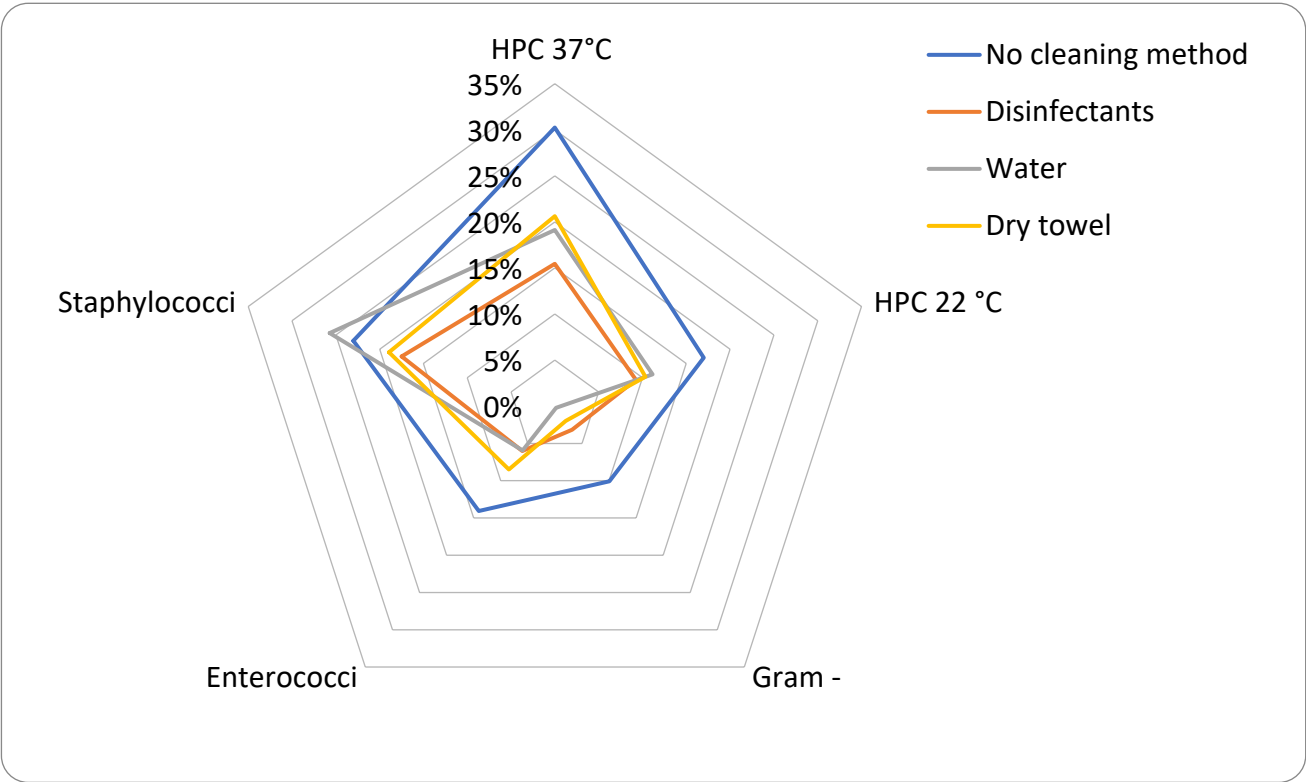

Figure S12: Radar plot for Last cleaning

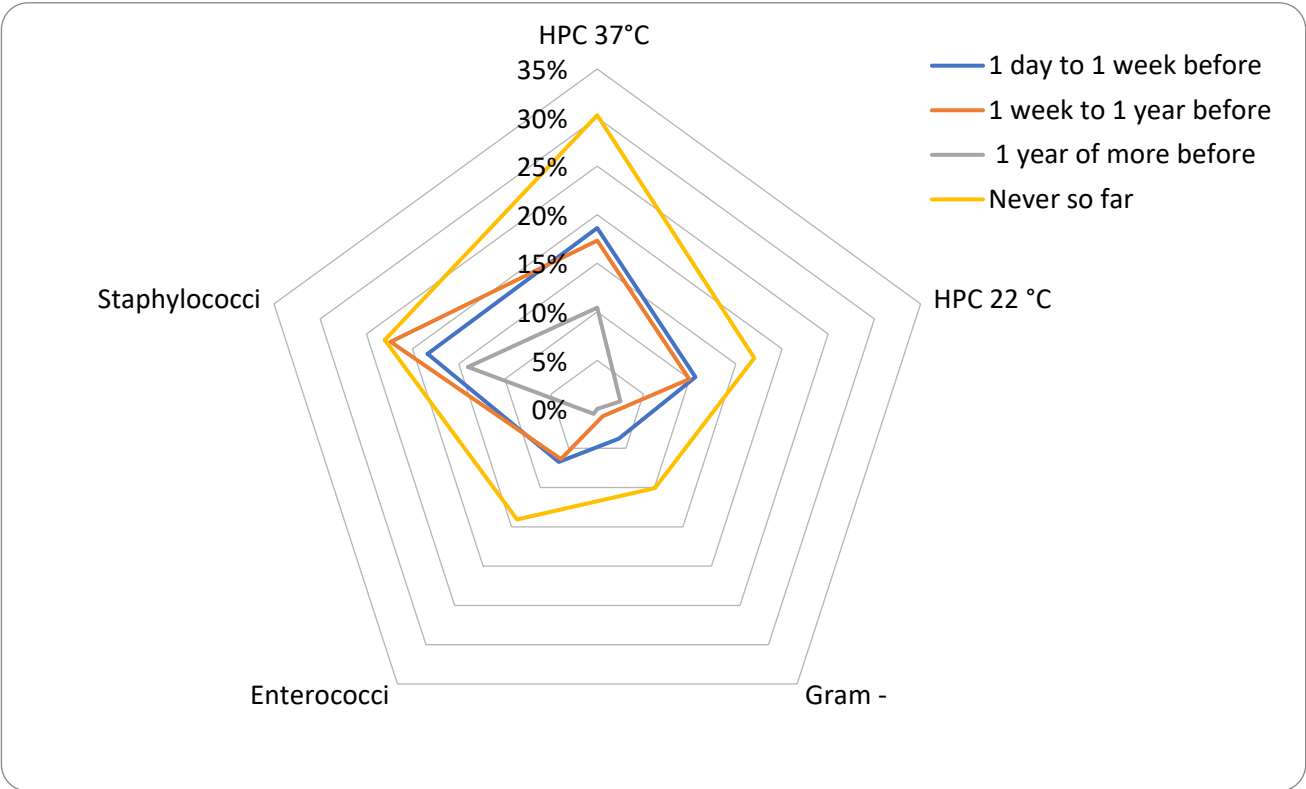

Figure S13: Radar plot for Use with gloves

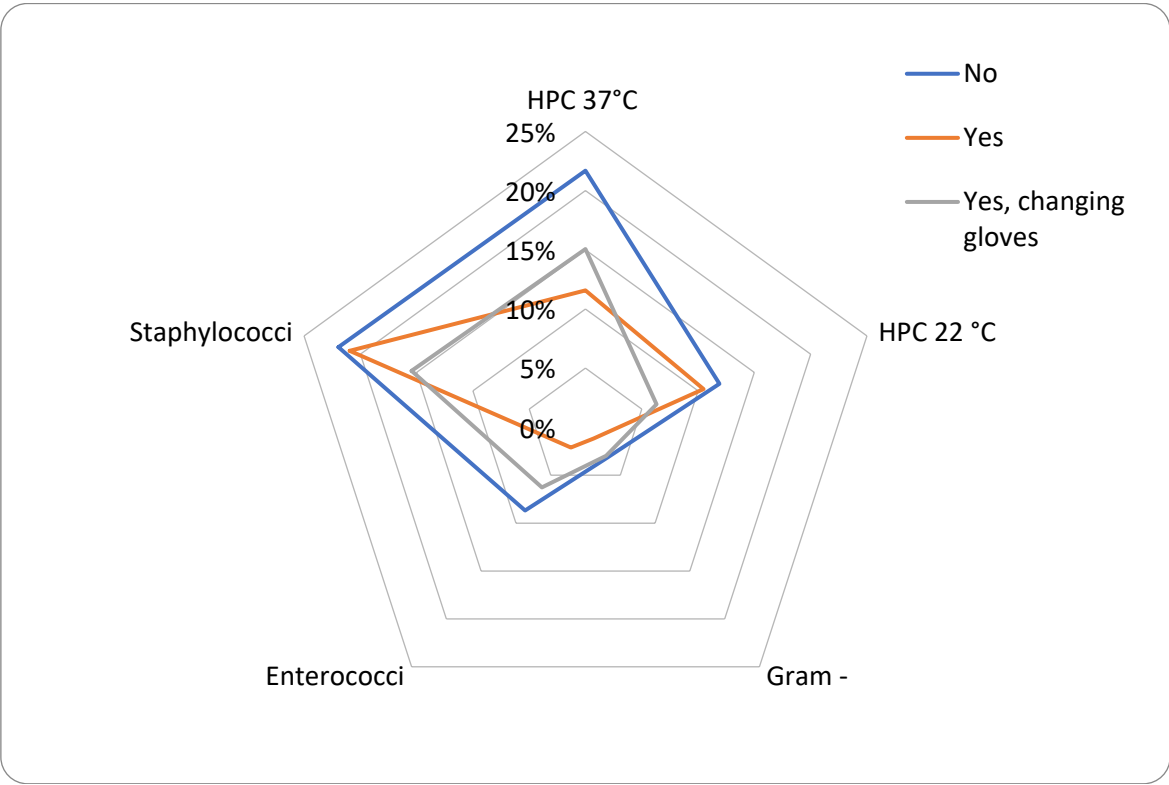

Figure S14: Radar plot for Usual means of transport

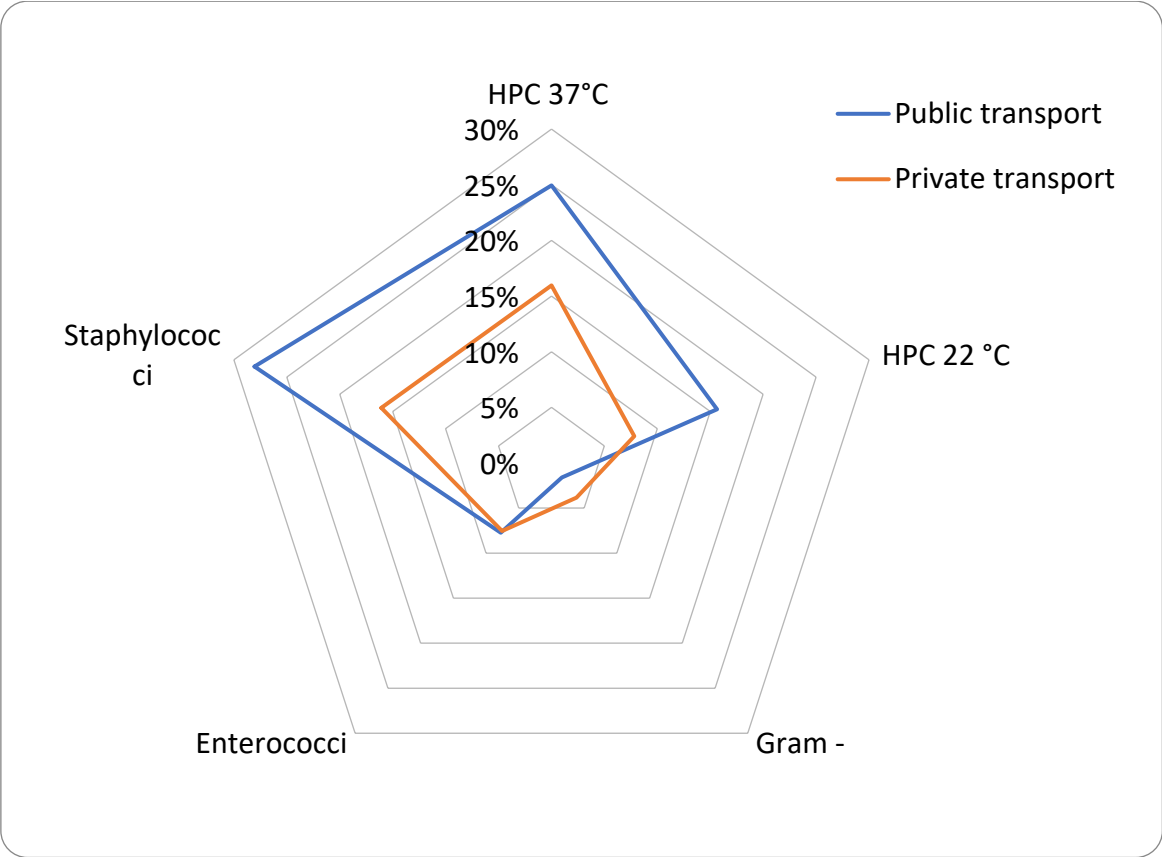

Figure S15: Radar plot for Means of transport in the day of sampling

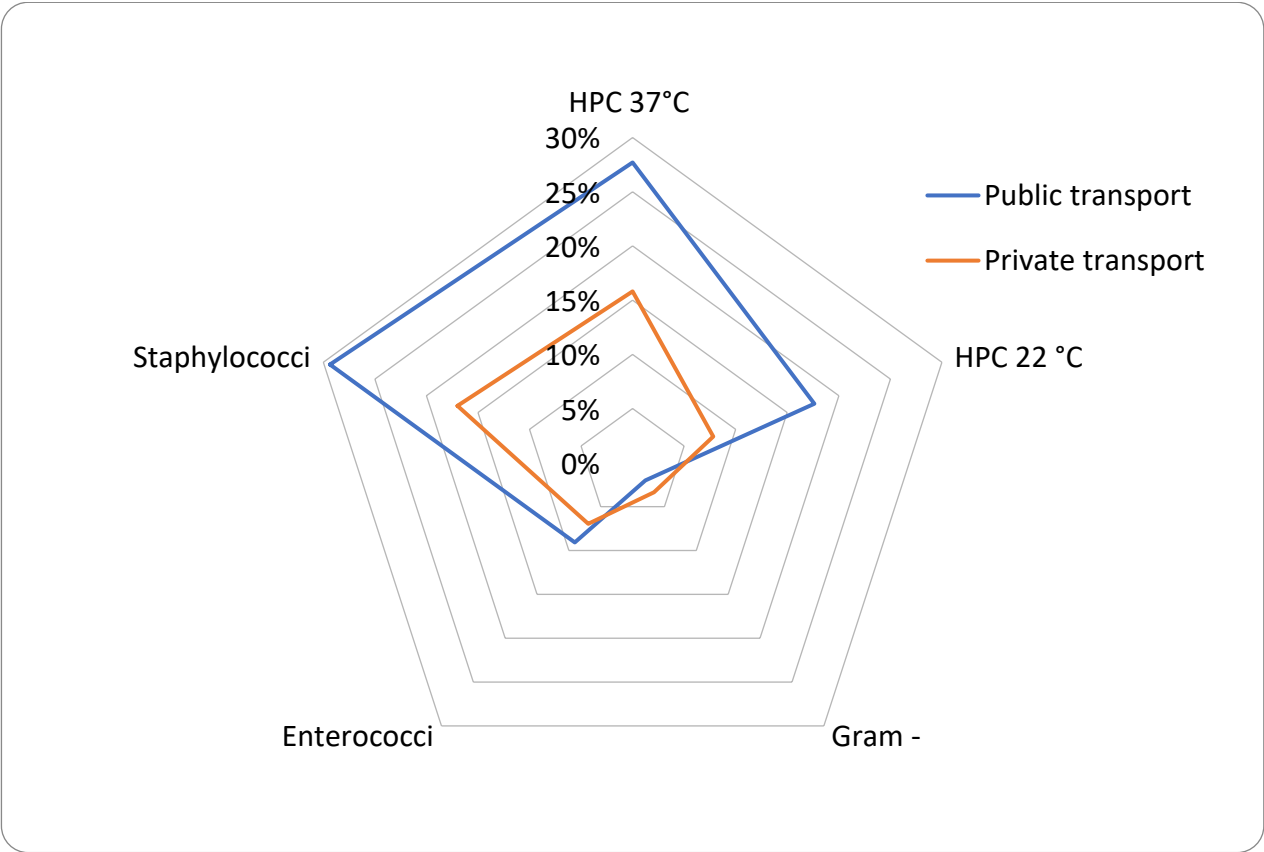

## Scatter Plots comparing mean HPCs 37 °C and HPCs 22 °C across the selected variables

Figure S16: HPCs 37 °C and HPCs 22 °C based on Age

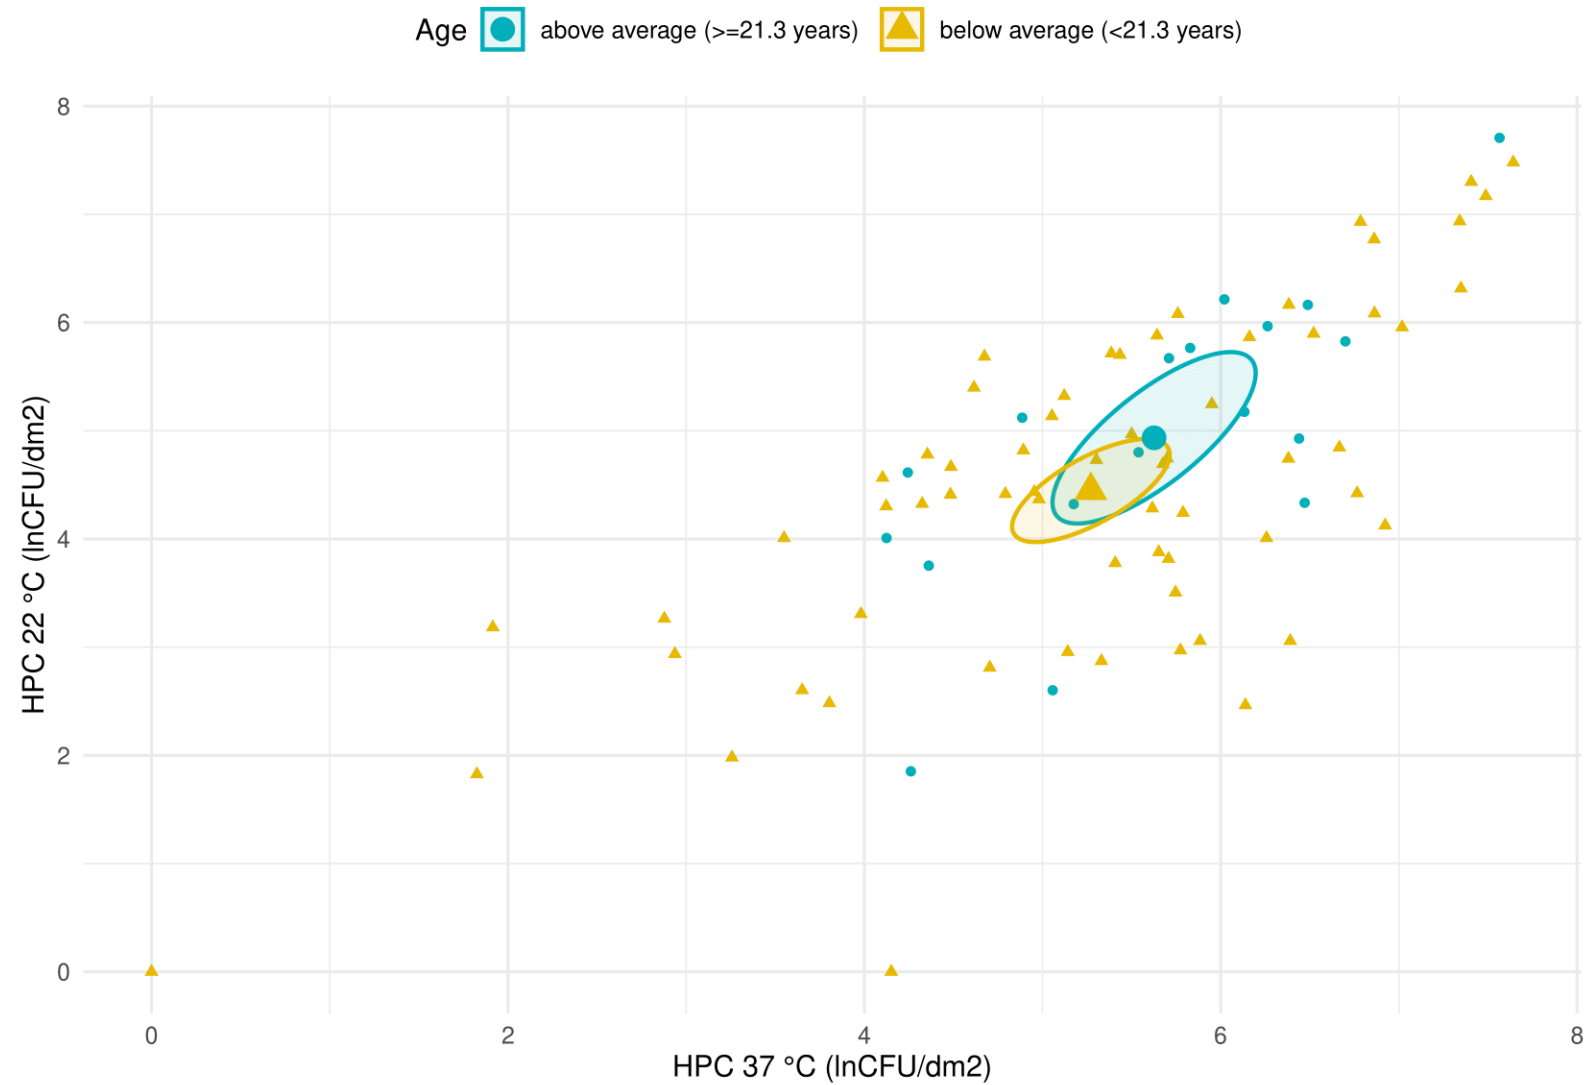



**Figure S17: HPCs 37 °C and HPCs 22 °C based on Cleaning frequency**

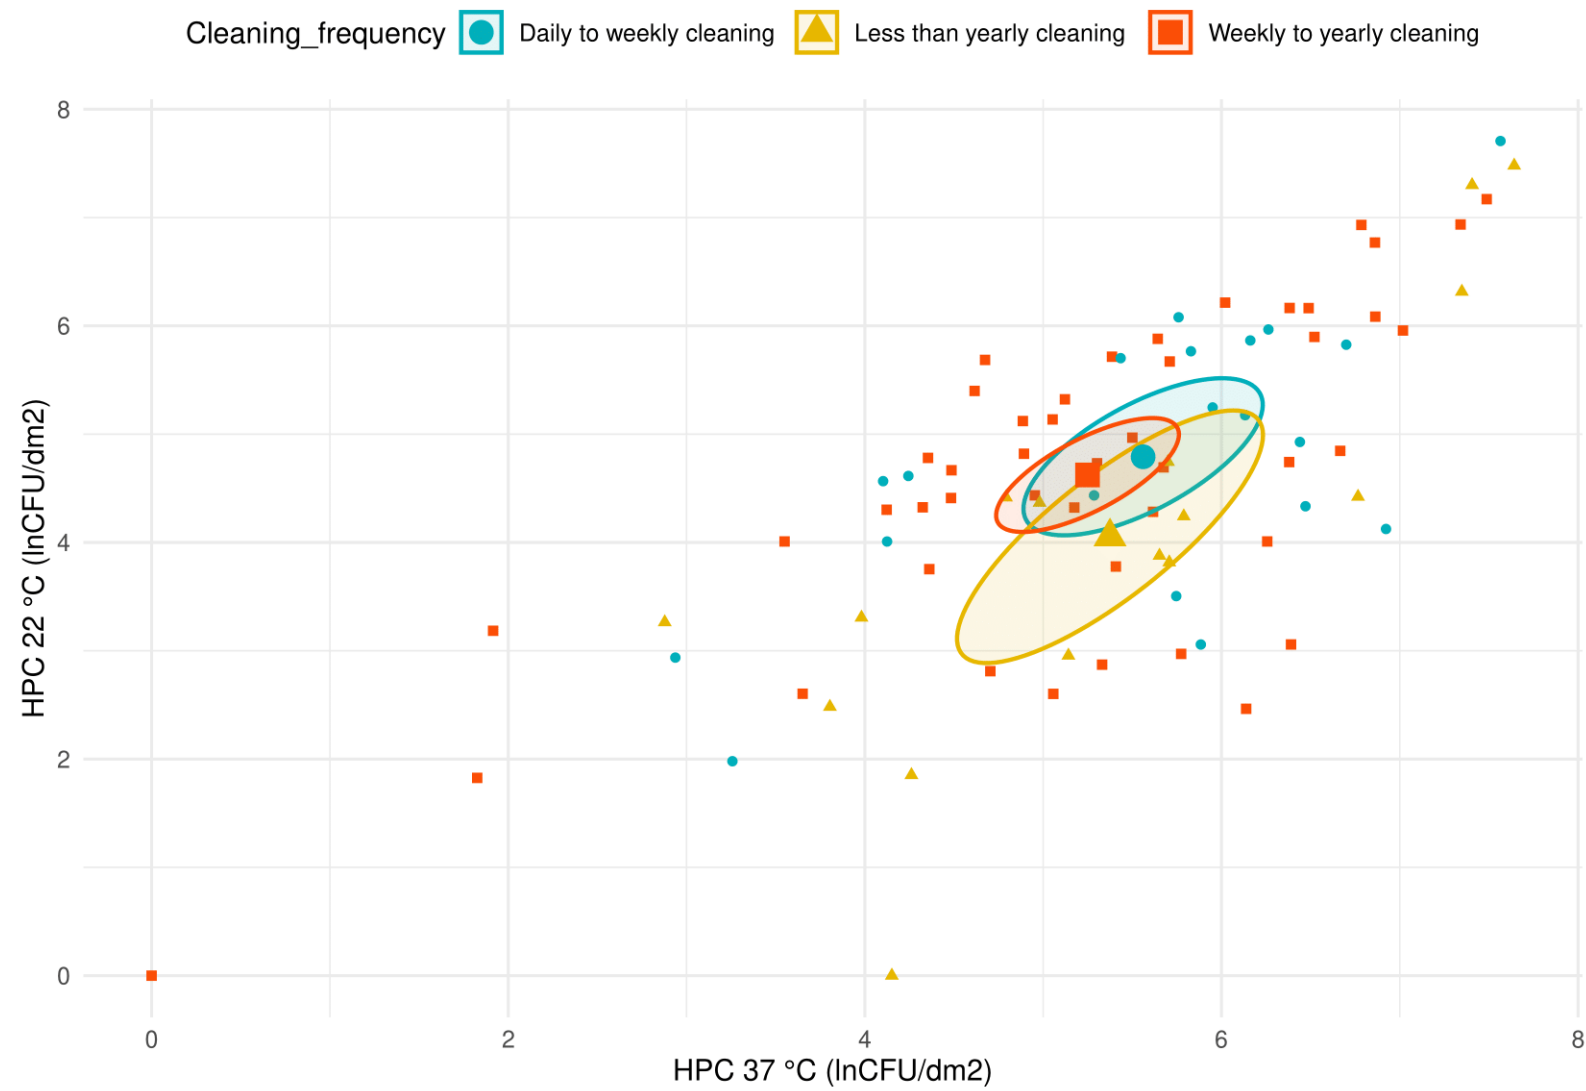

**Figure S18: HPCs 37 °C and HPCs 22 °C based on Cleaning method**

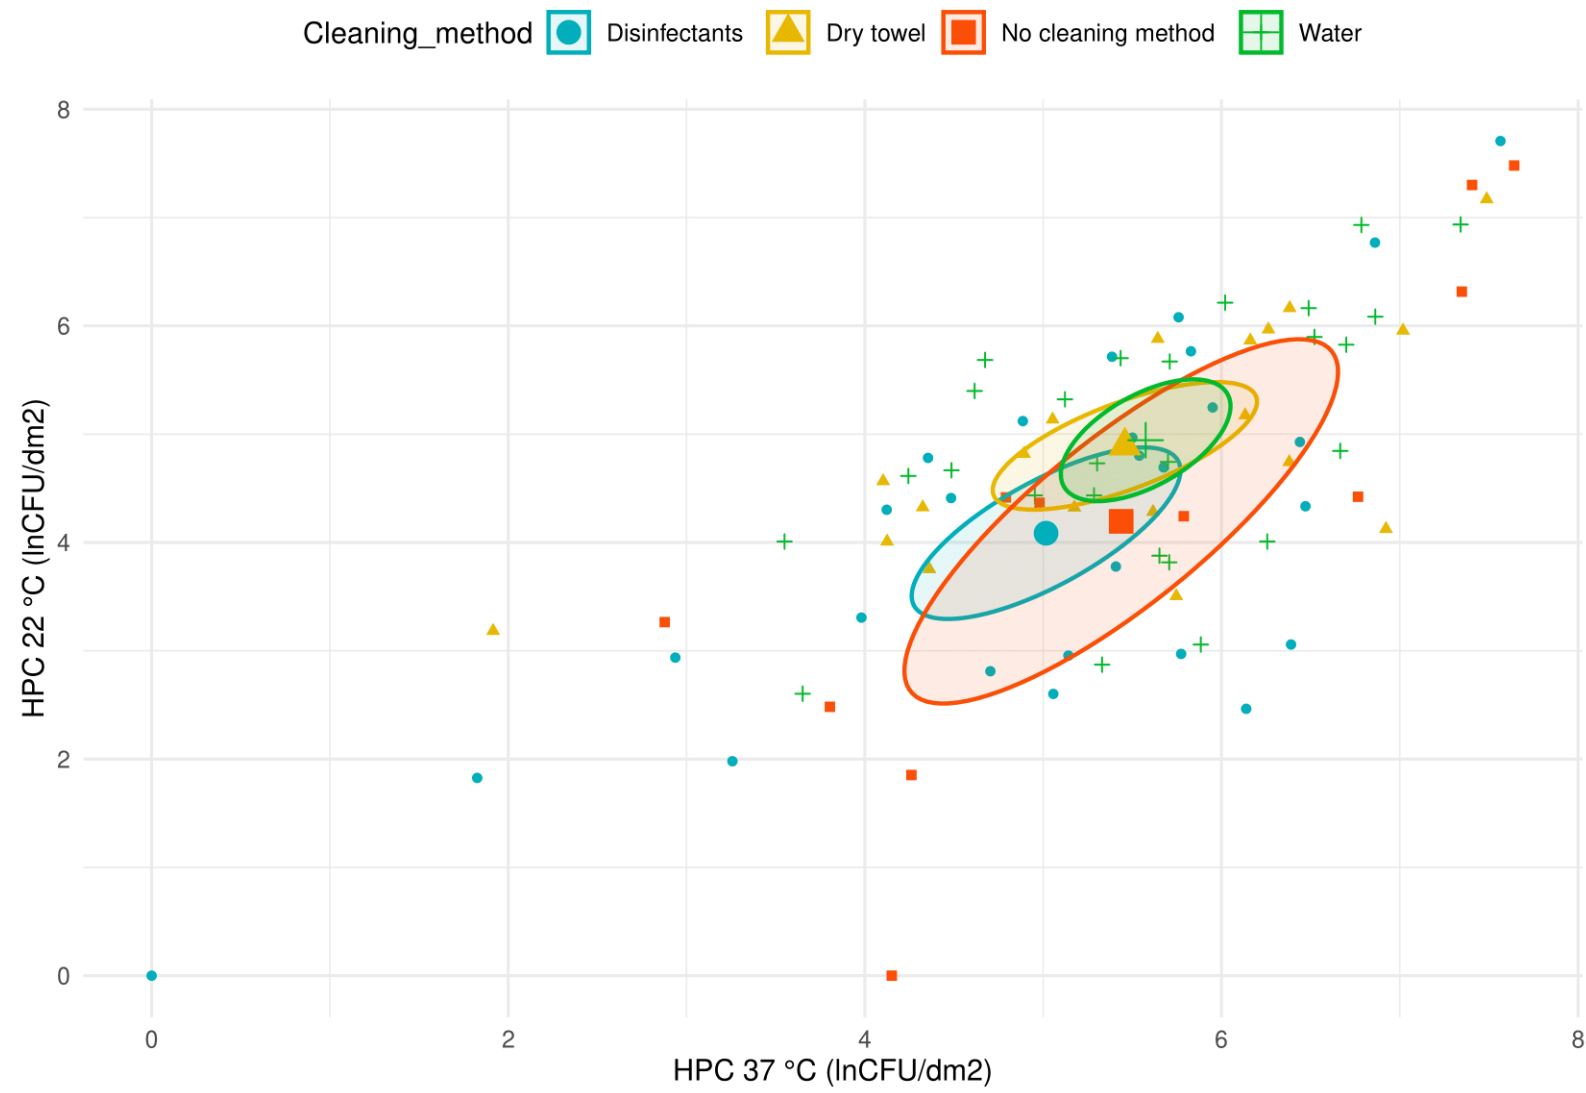

Figure S19: HPCs 37 °C and HPCs 22 °C based on Cover type

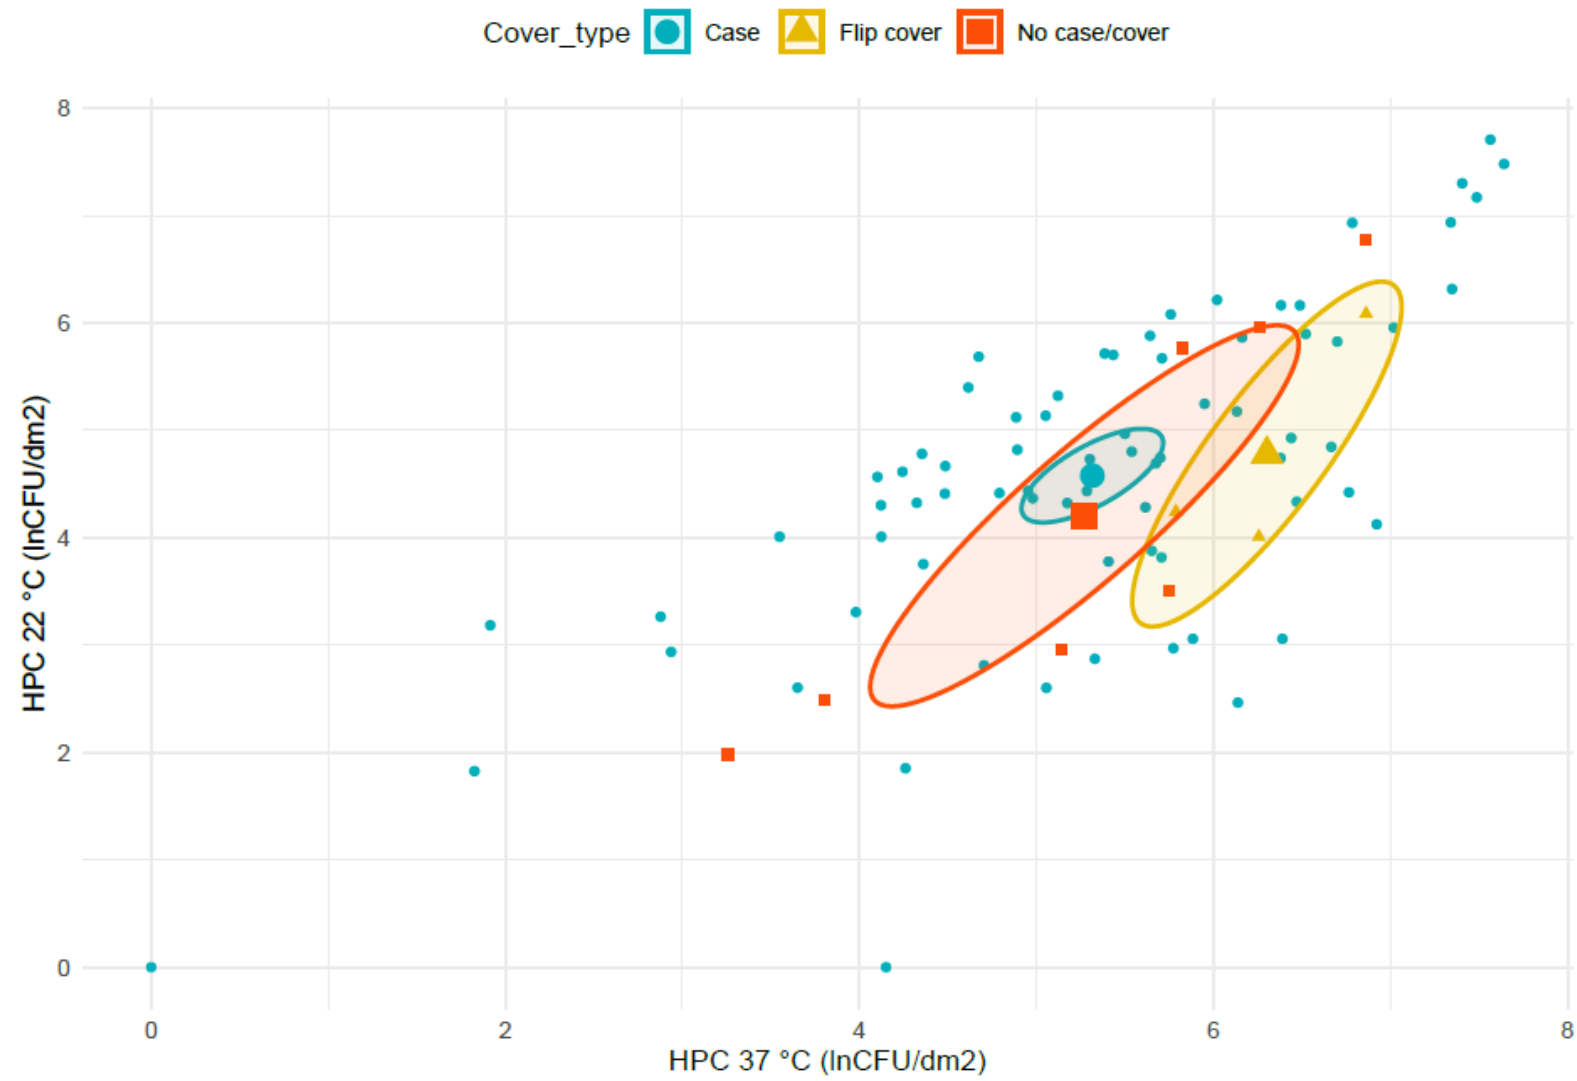

**Figure S20: HPCs 37 °C and HPCs 22 °C based on European Head SAR (W/kg)**

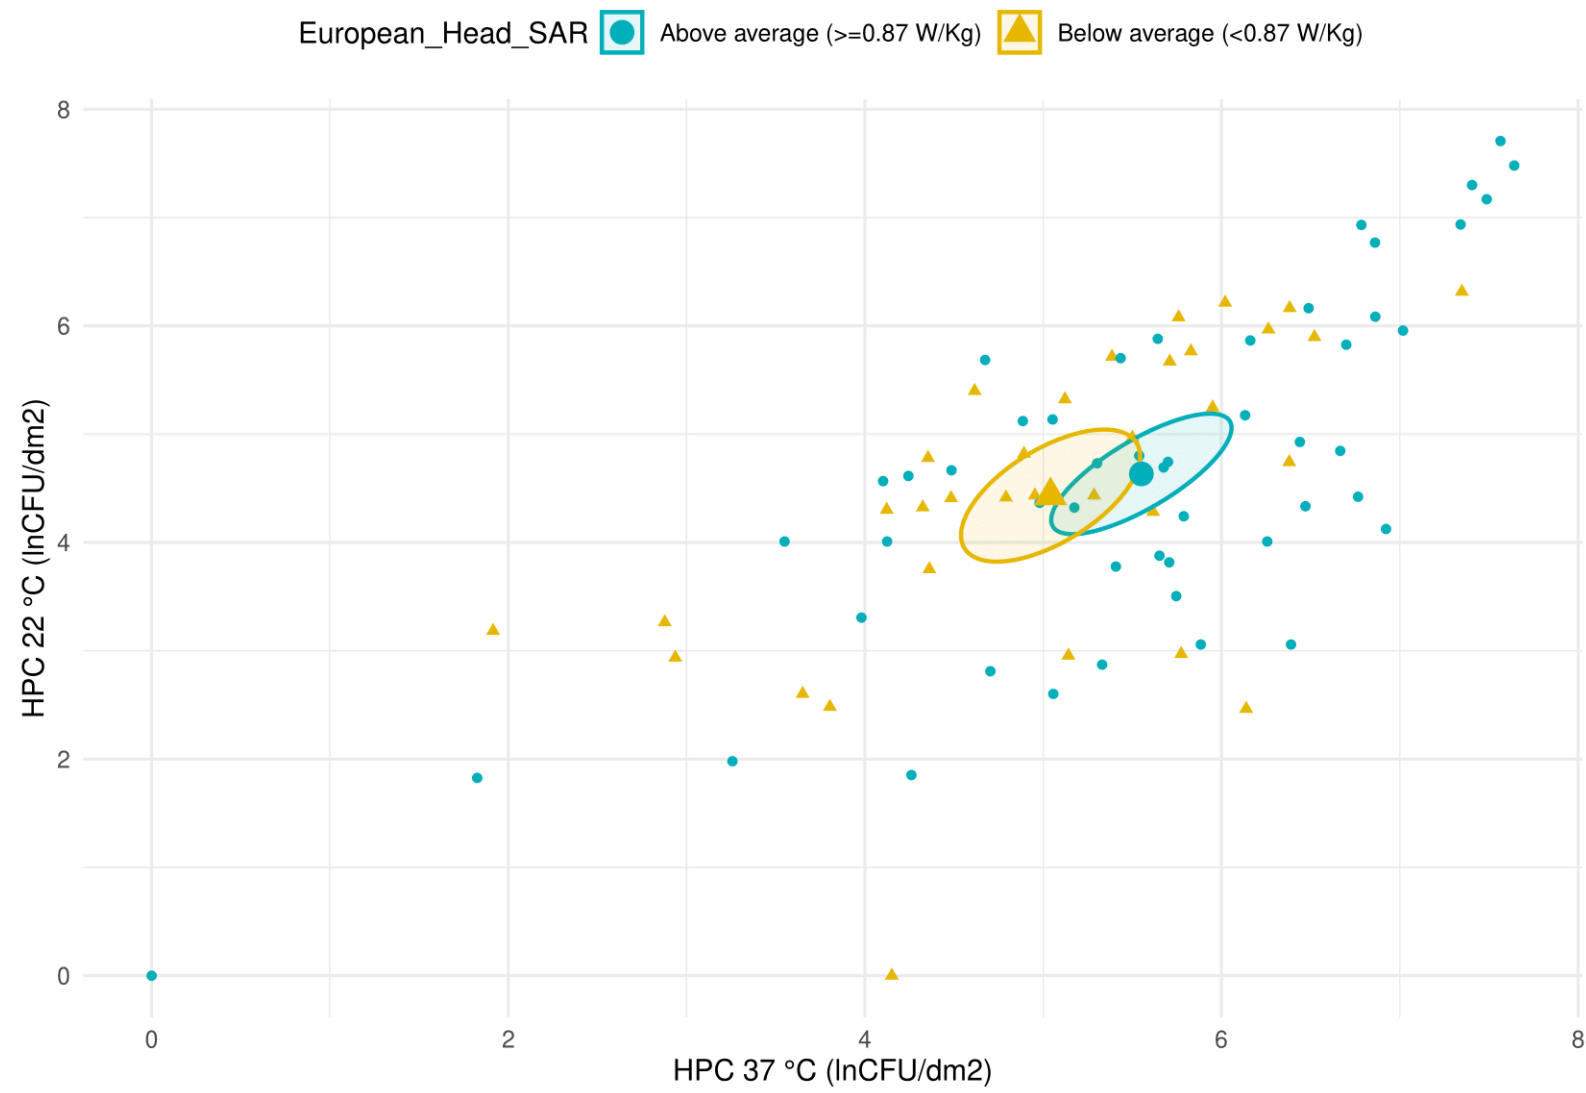

**Figure S21: HPCs 37 °C and HPCs 22 °C based on Gender**

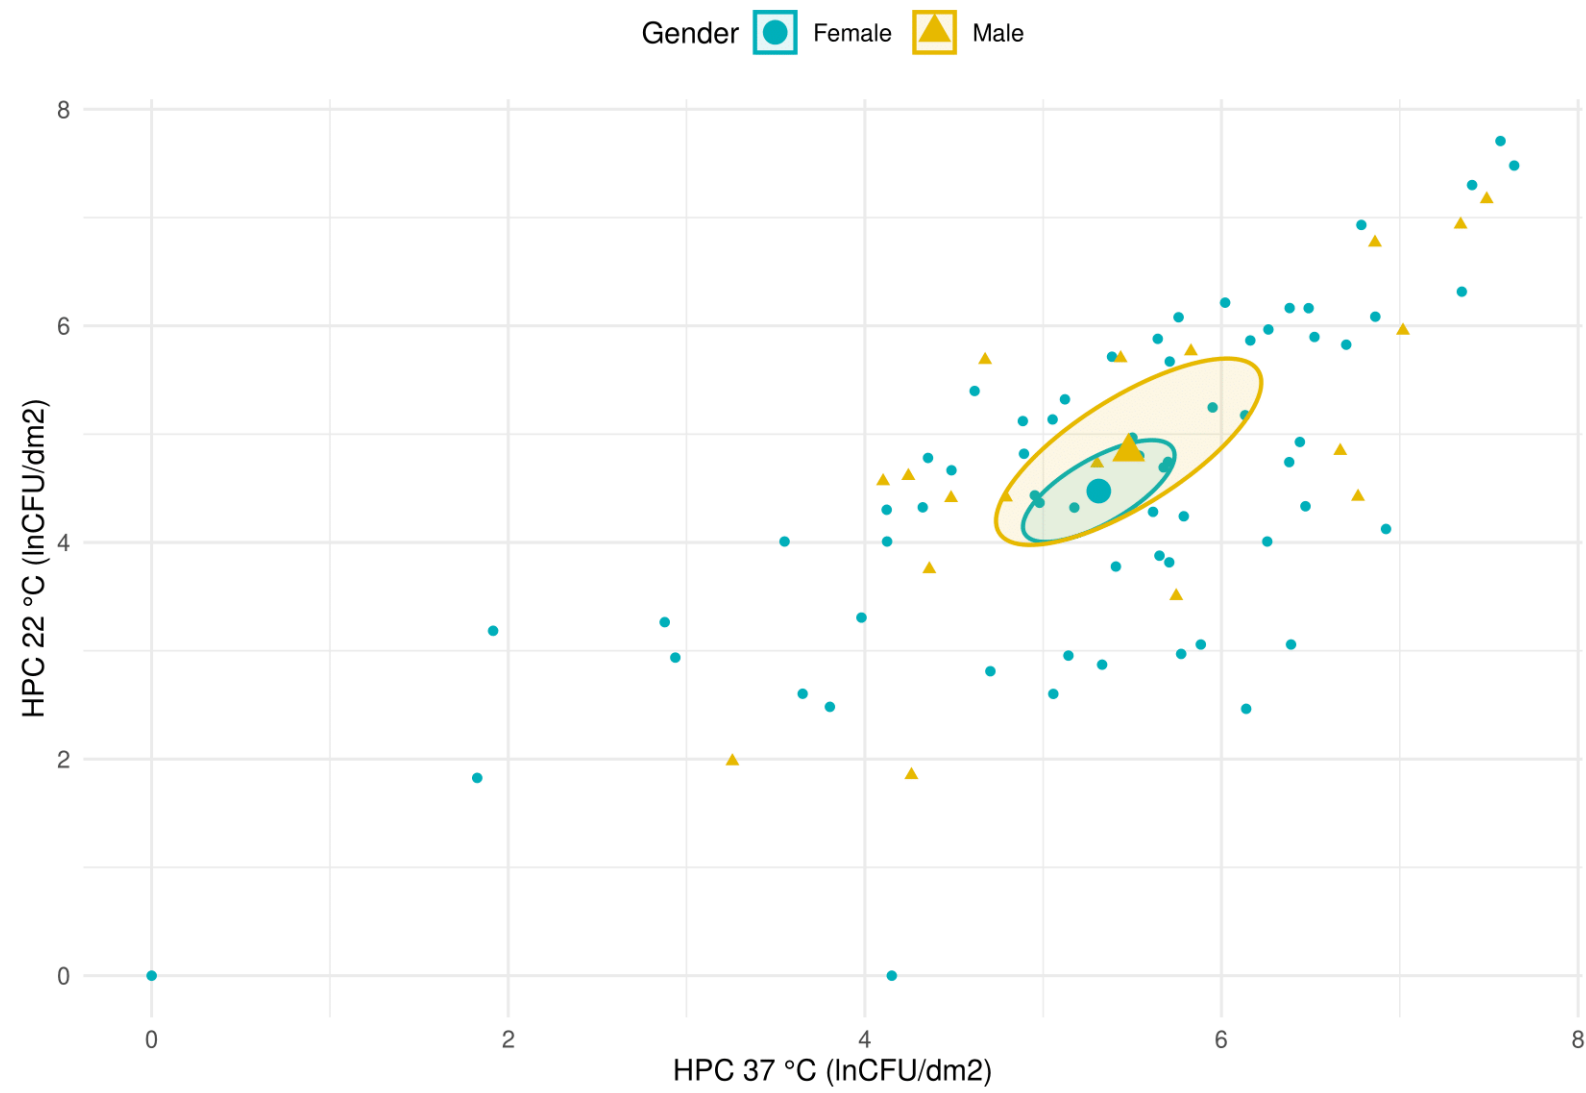

**Figure S22: HPCs 37 °C and HPCs 22 °C based on Health Status**

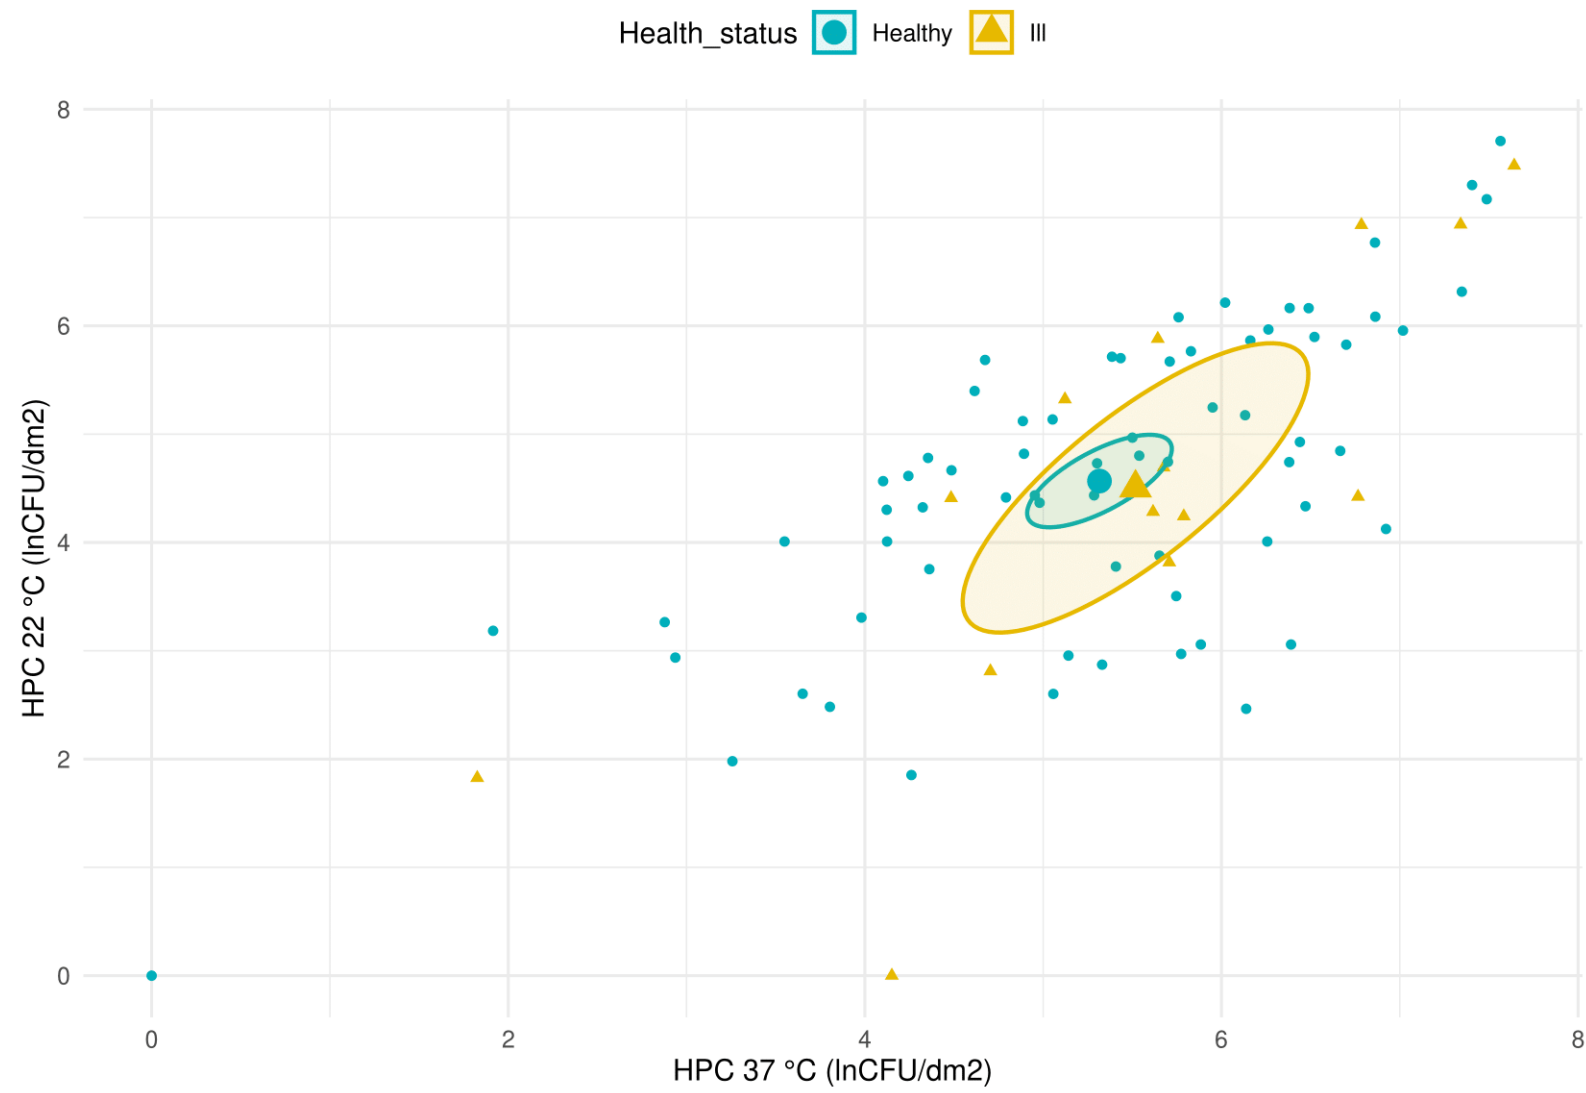

**Figure S23: HPCs 37 °C and HPCs 22 °C based on Last Cleaning**

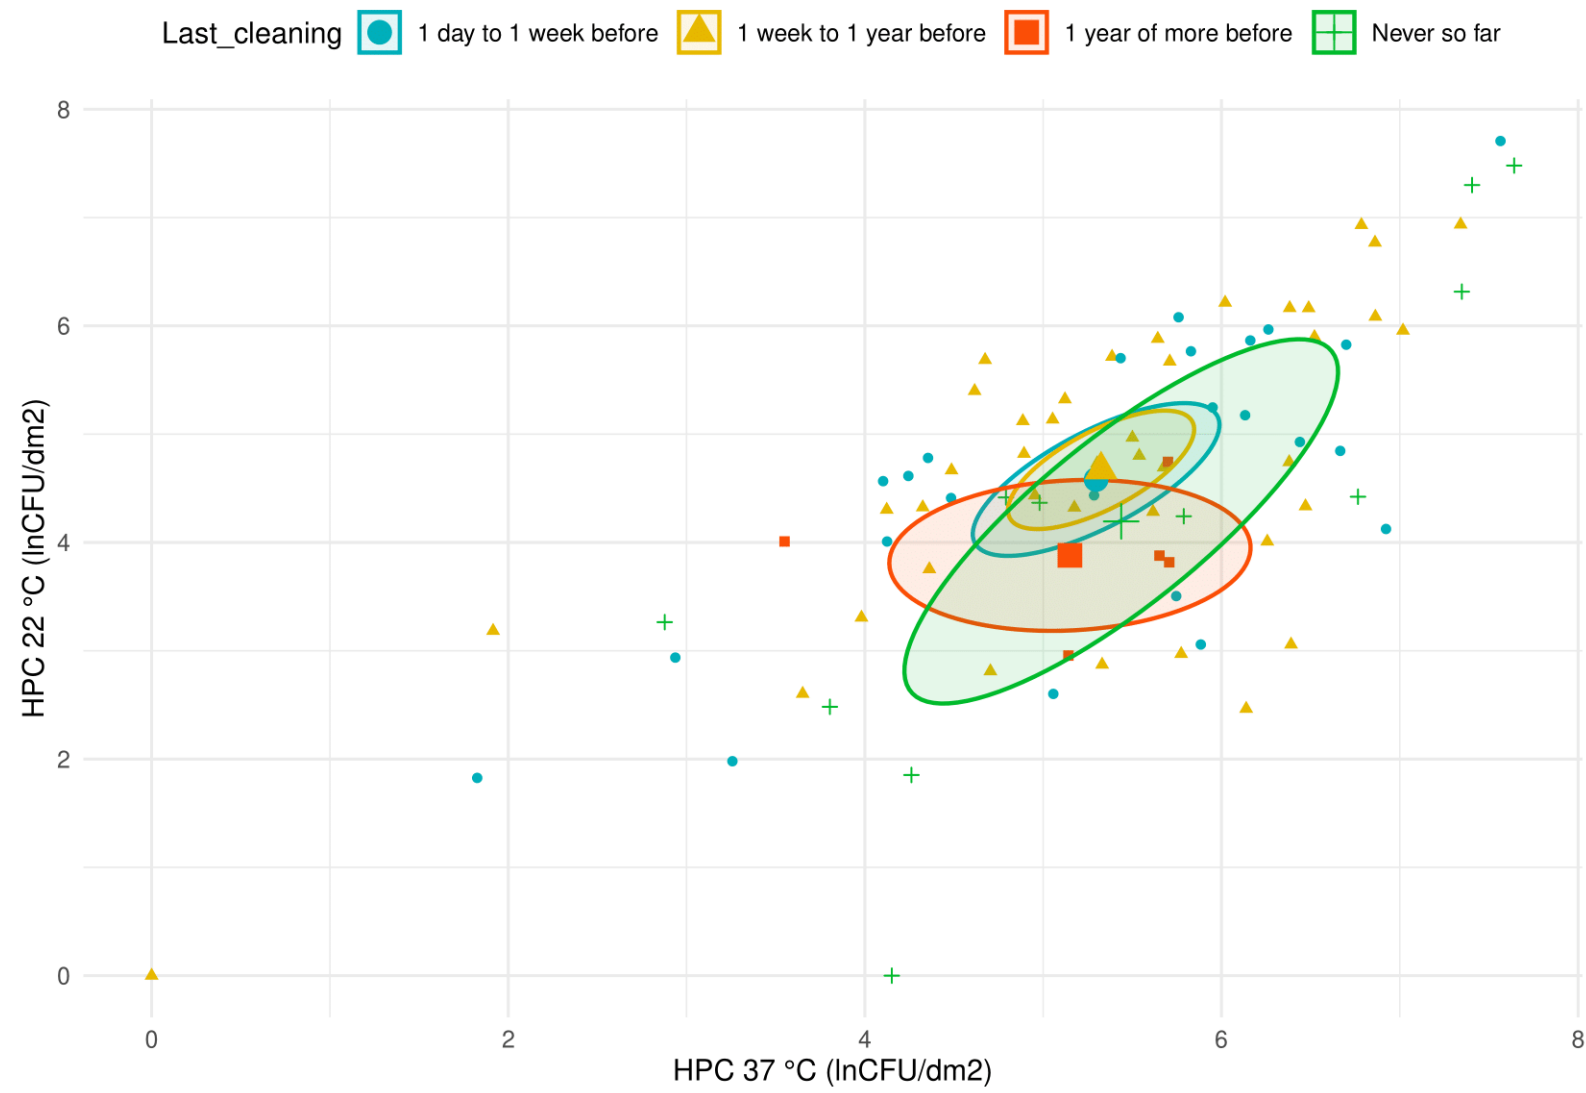

**Figure S24: HPCs 37 °C and HPCs 22 °C based on Means of transport in the day of sampling**

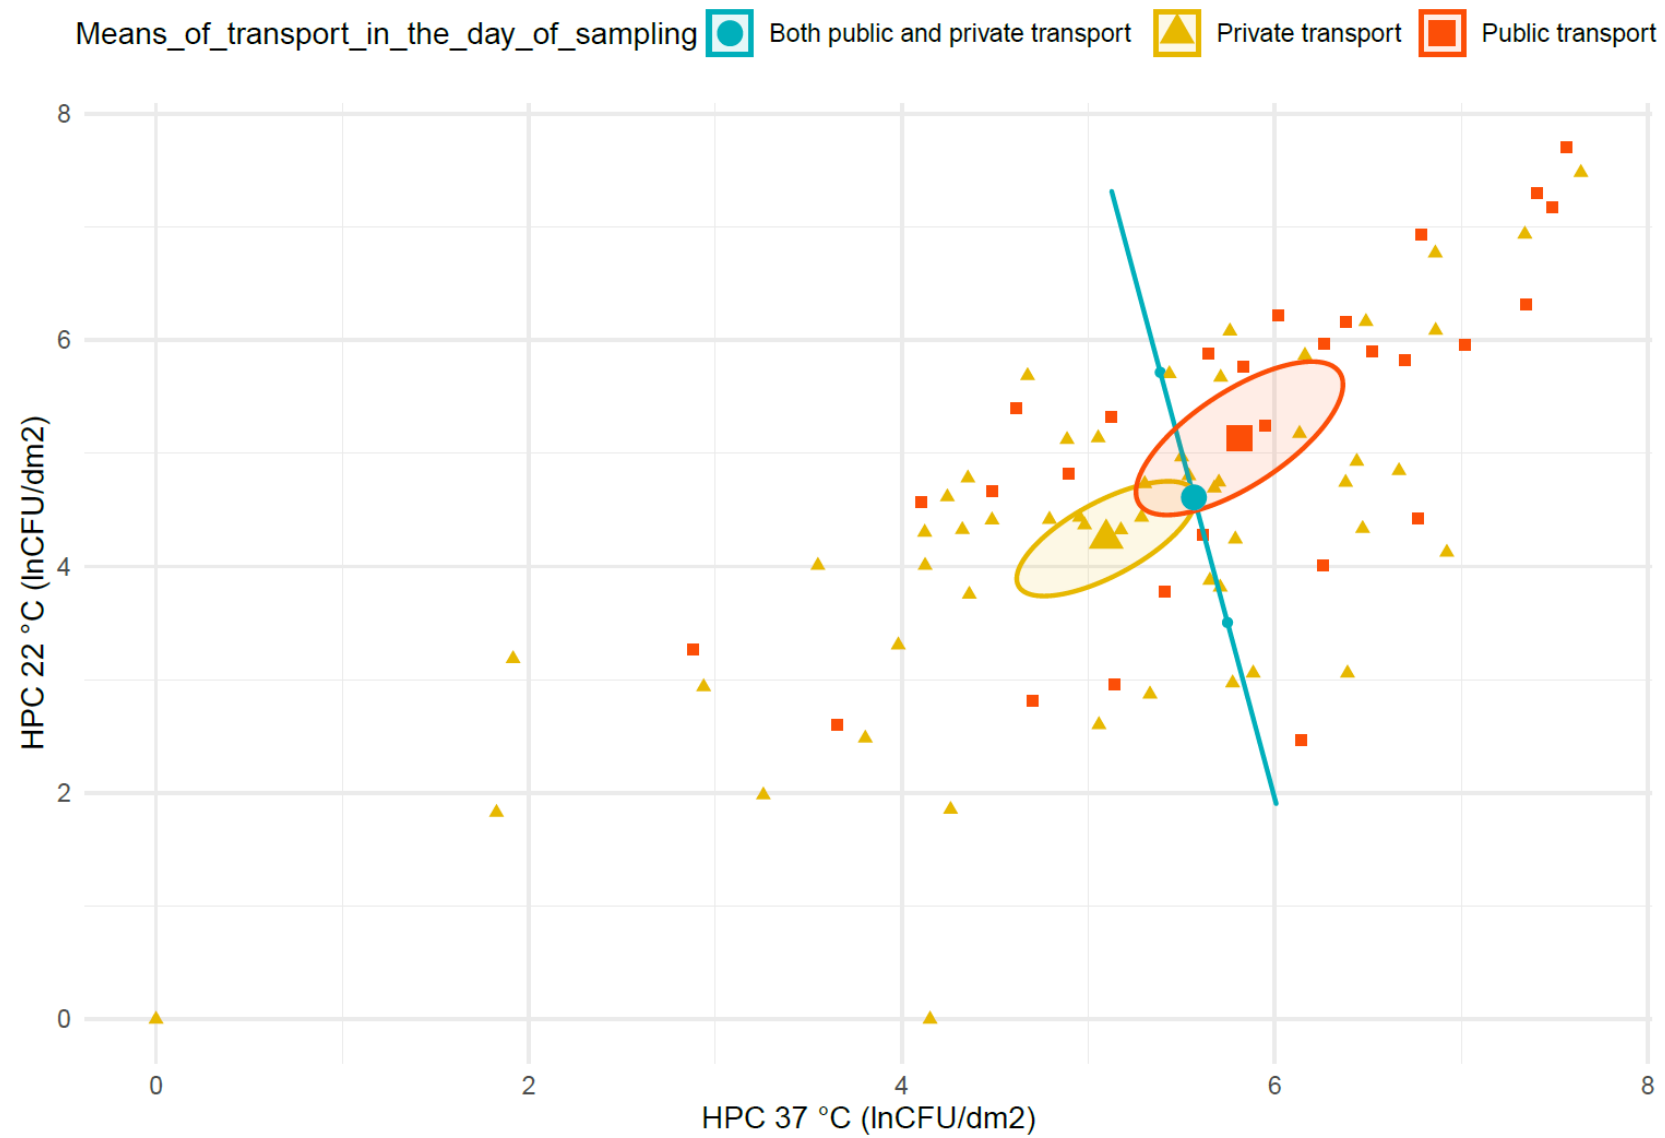



**Figure S25: HPCs 37 °C and HPCs 22 °C based on Place of training**

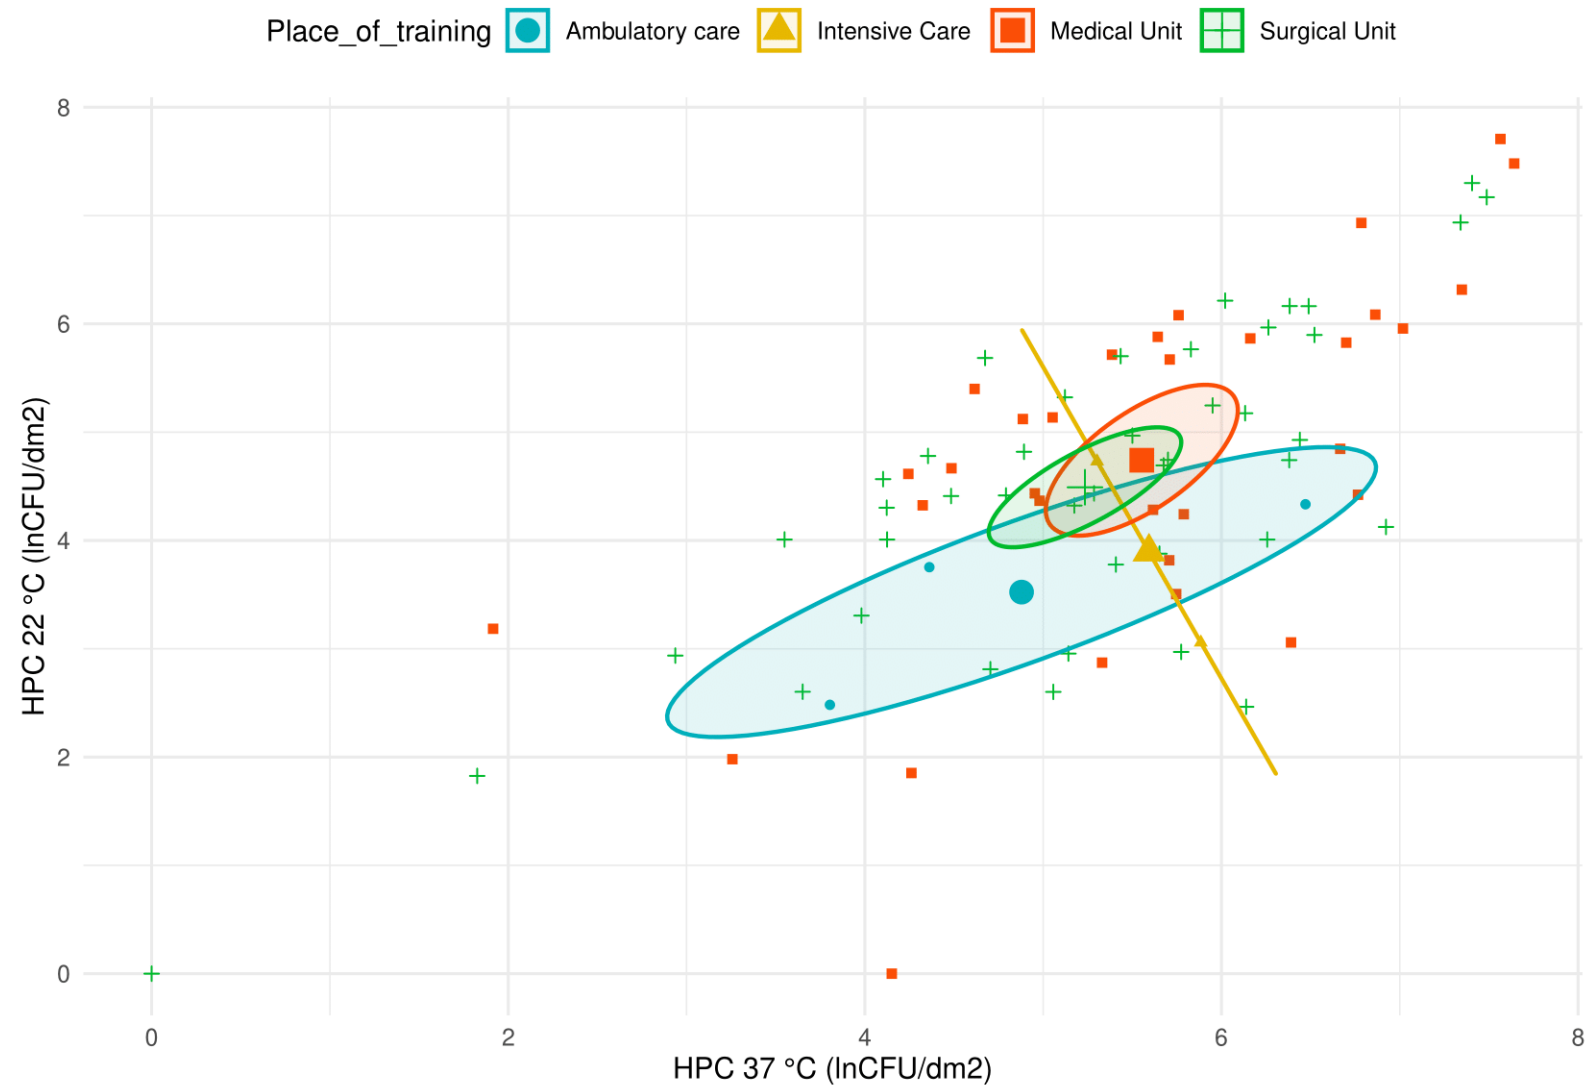

**Figure S26: HPCs 37 °C and HPCs 22 °C based on Screen protector**

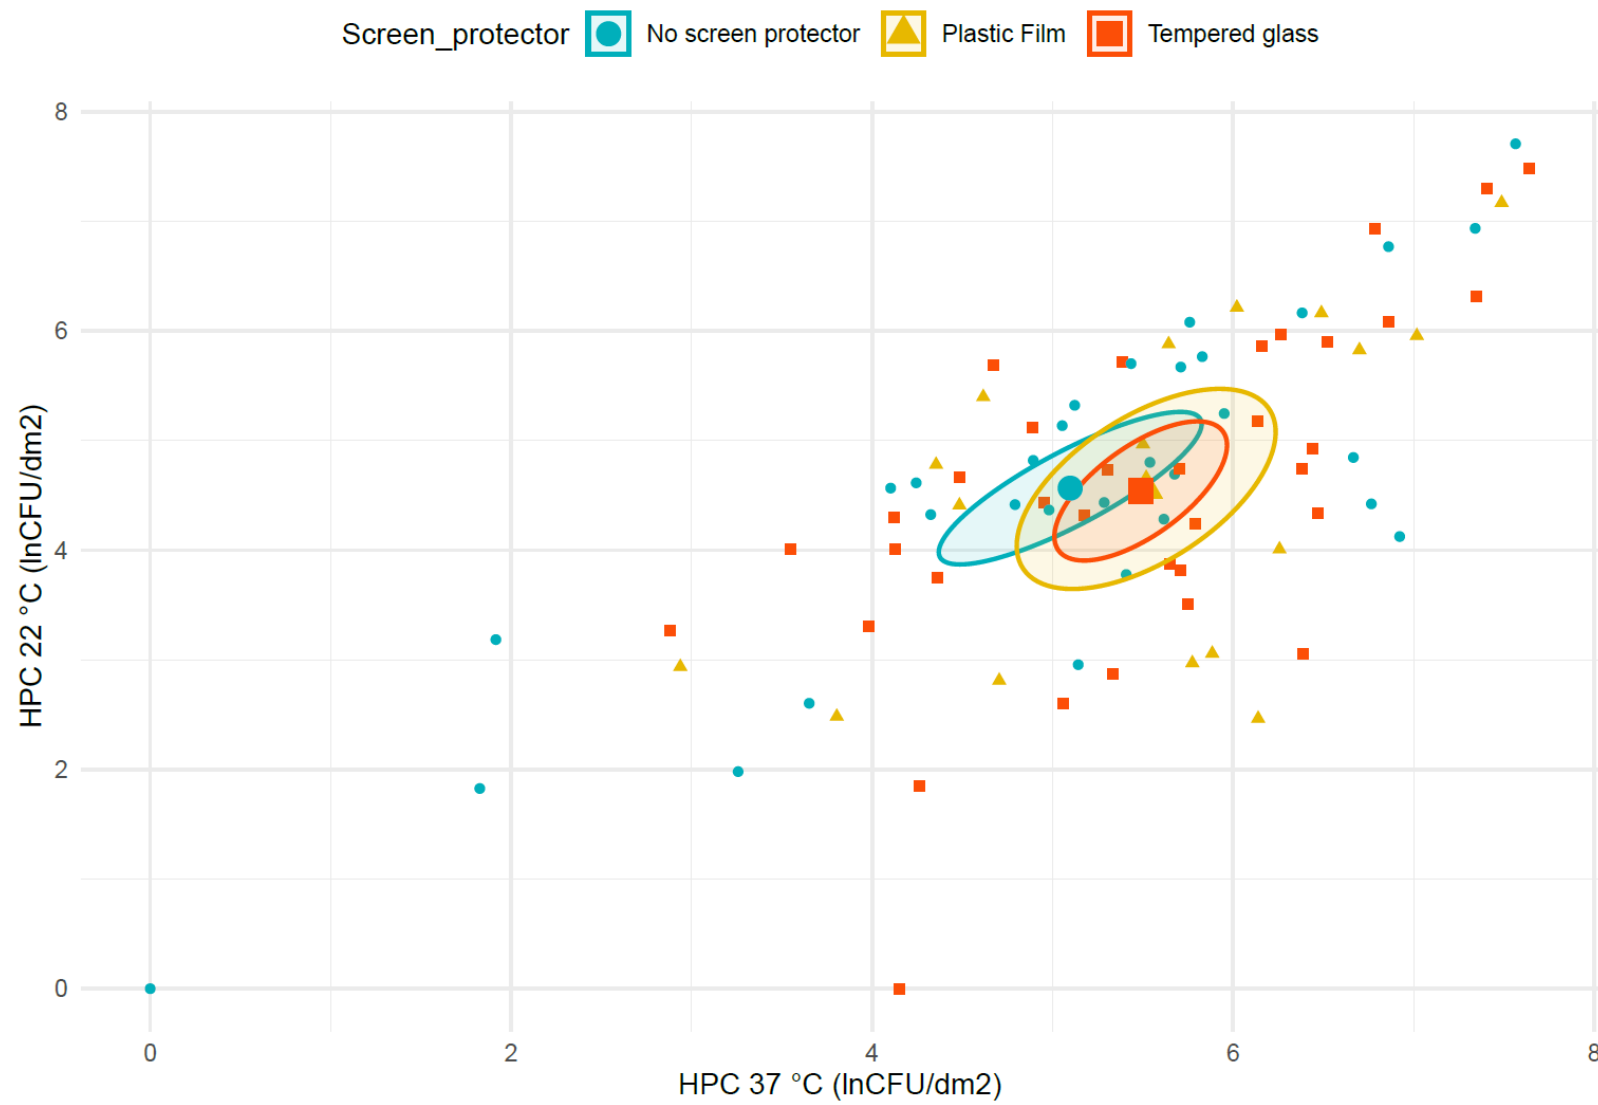

**Figure S27: HPCs 37 °C and HPCs 22 °C based on Smartphone age**

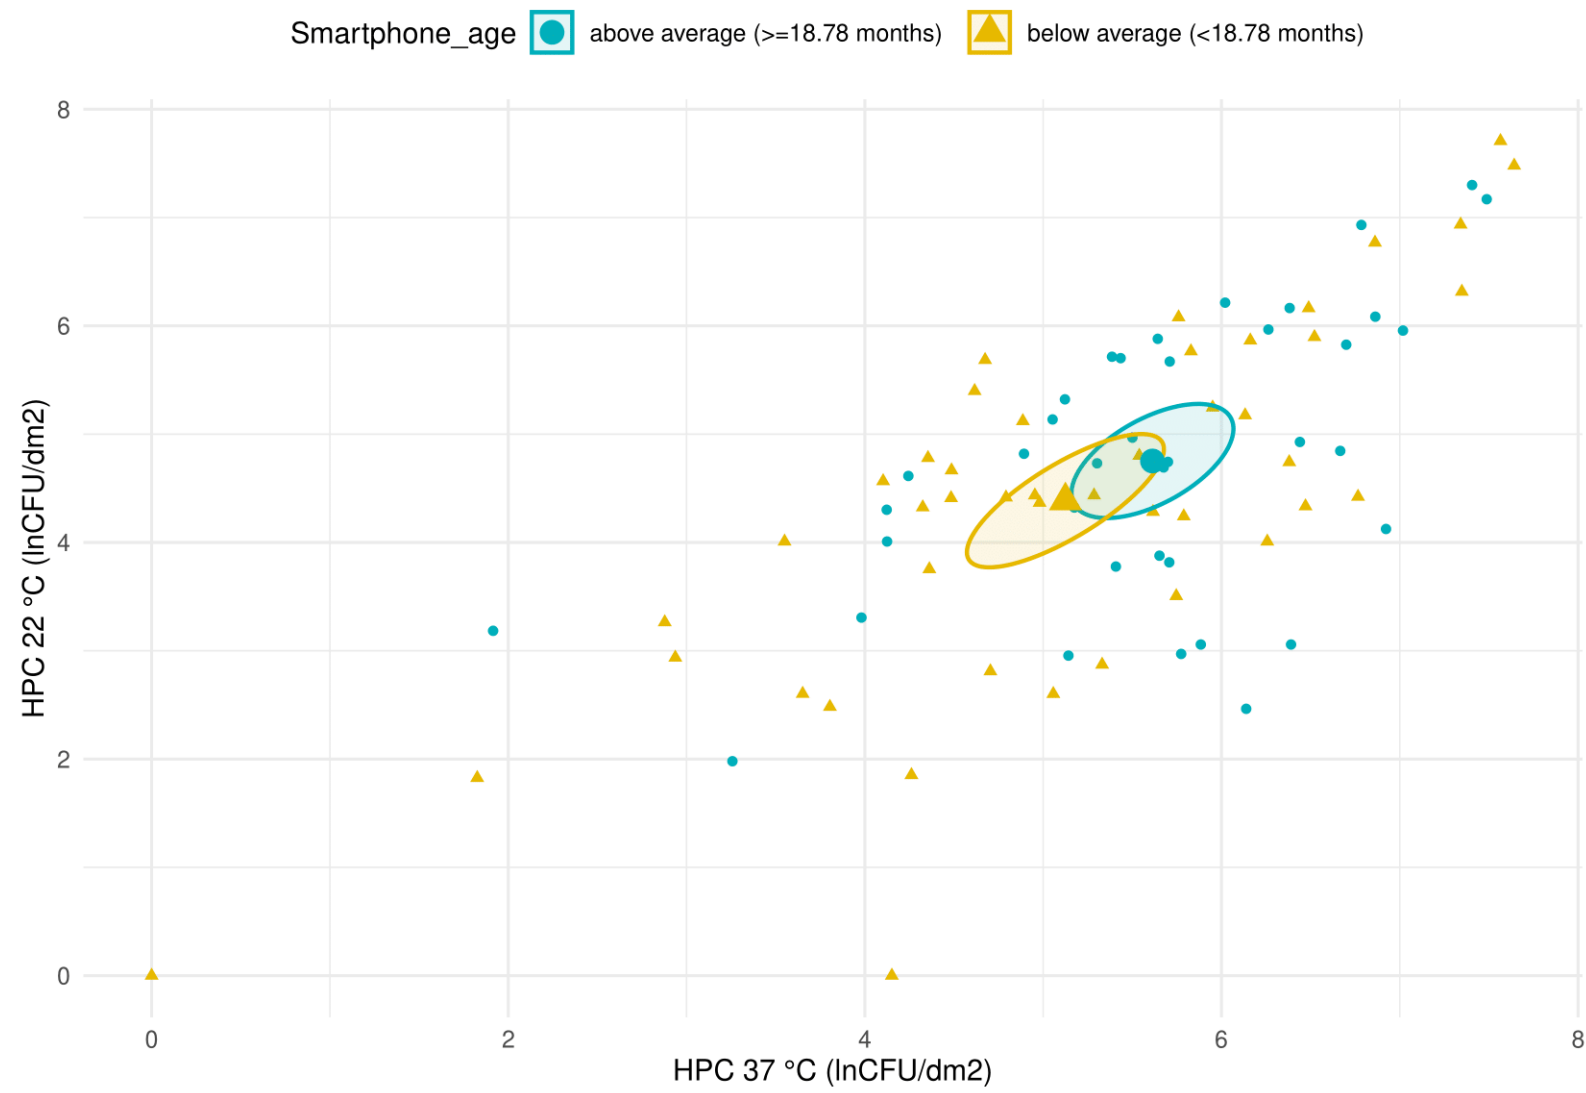

**Figure S28: HPCs 37 °C and HPCs 22 °C based on Training frequency**

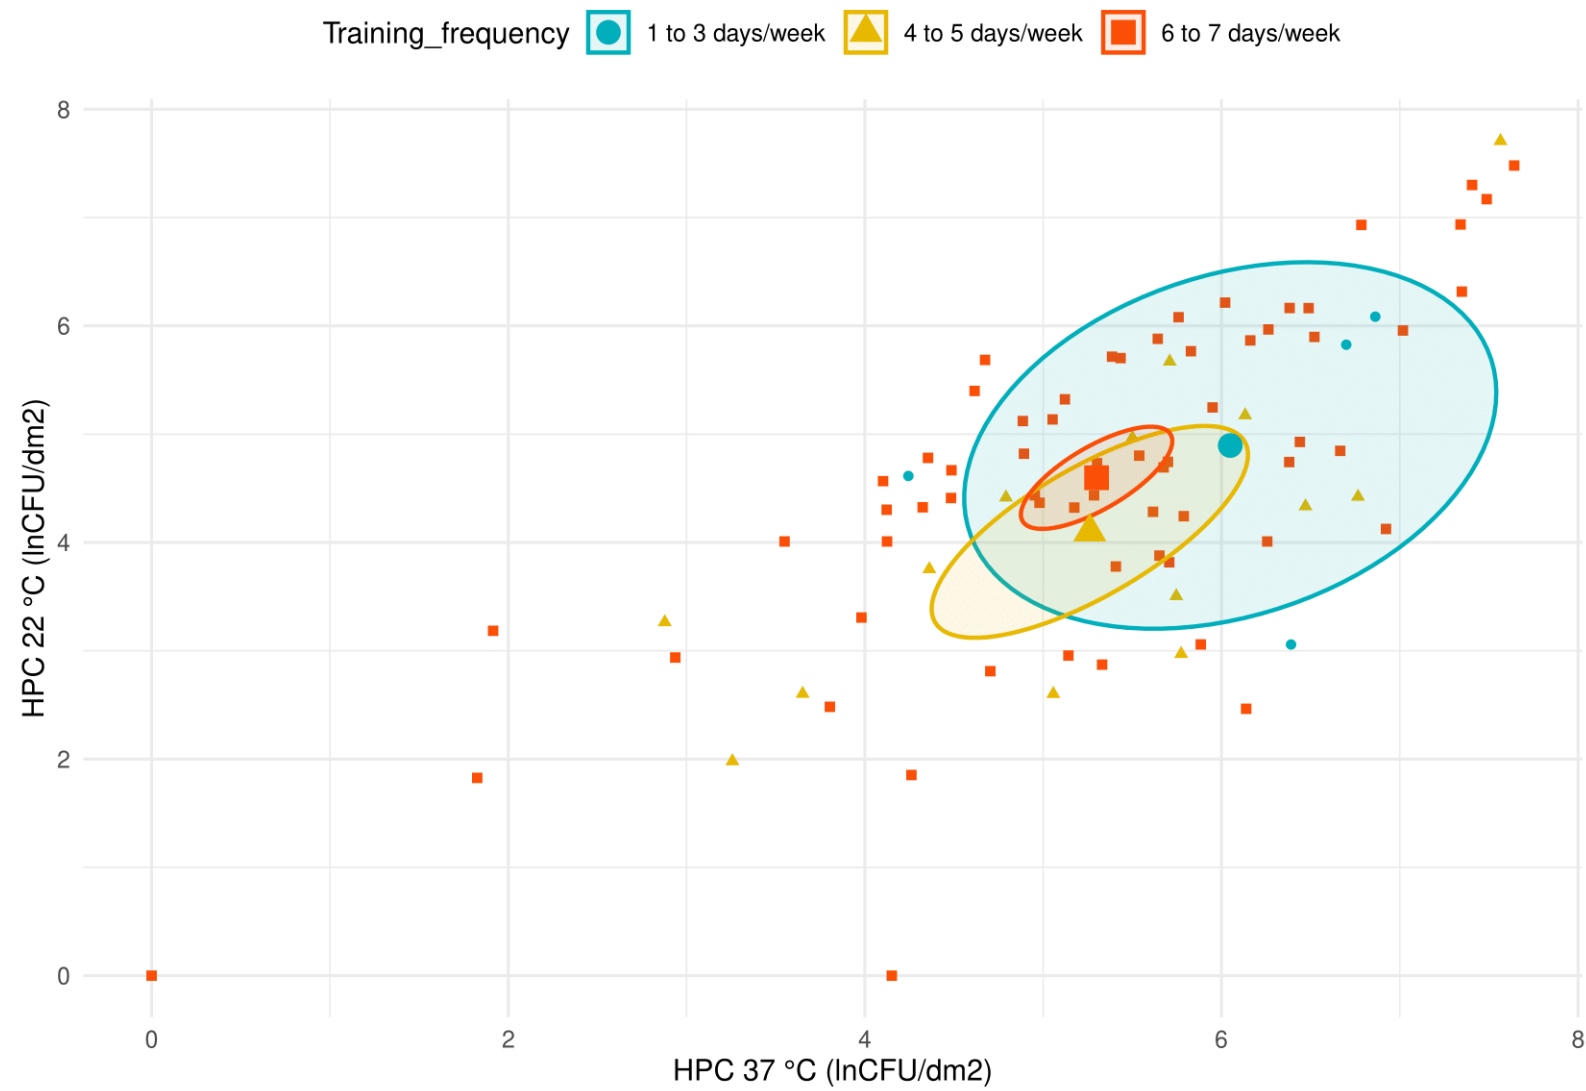

**Figure S29: HPCs 37 °C and HPCs 22 °C based on Use with gloves**

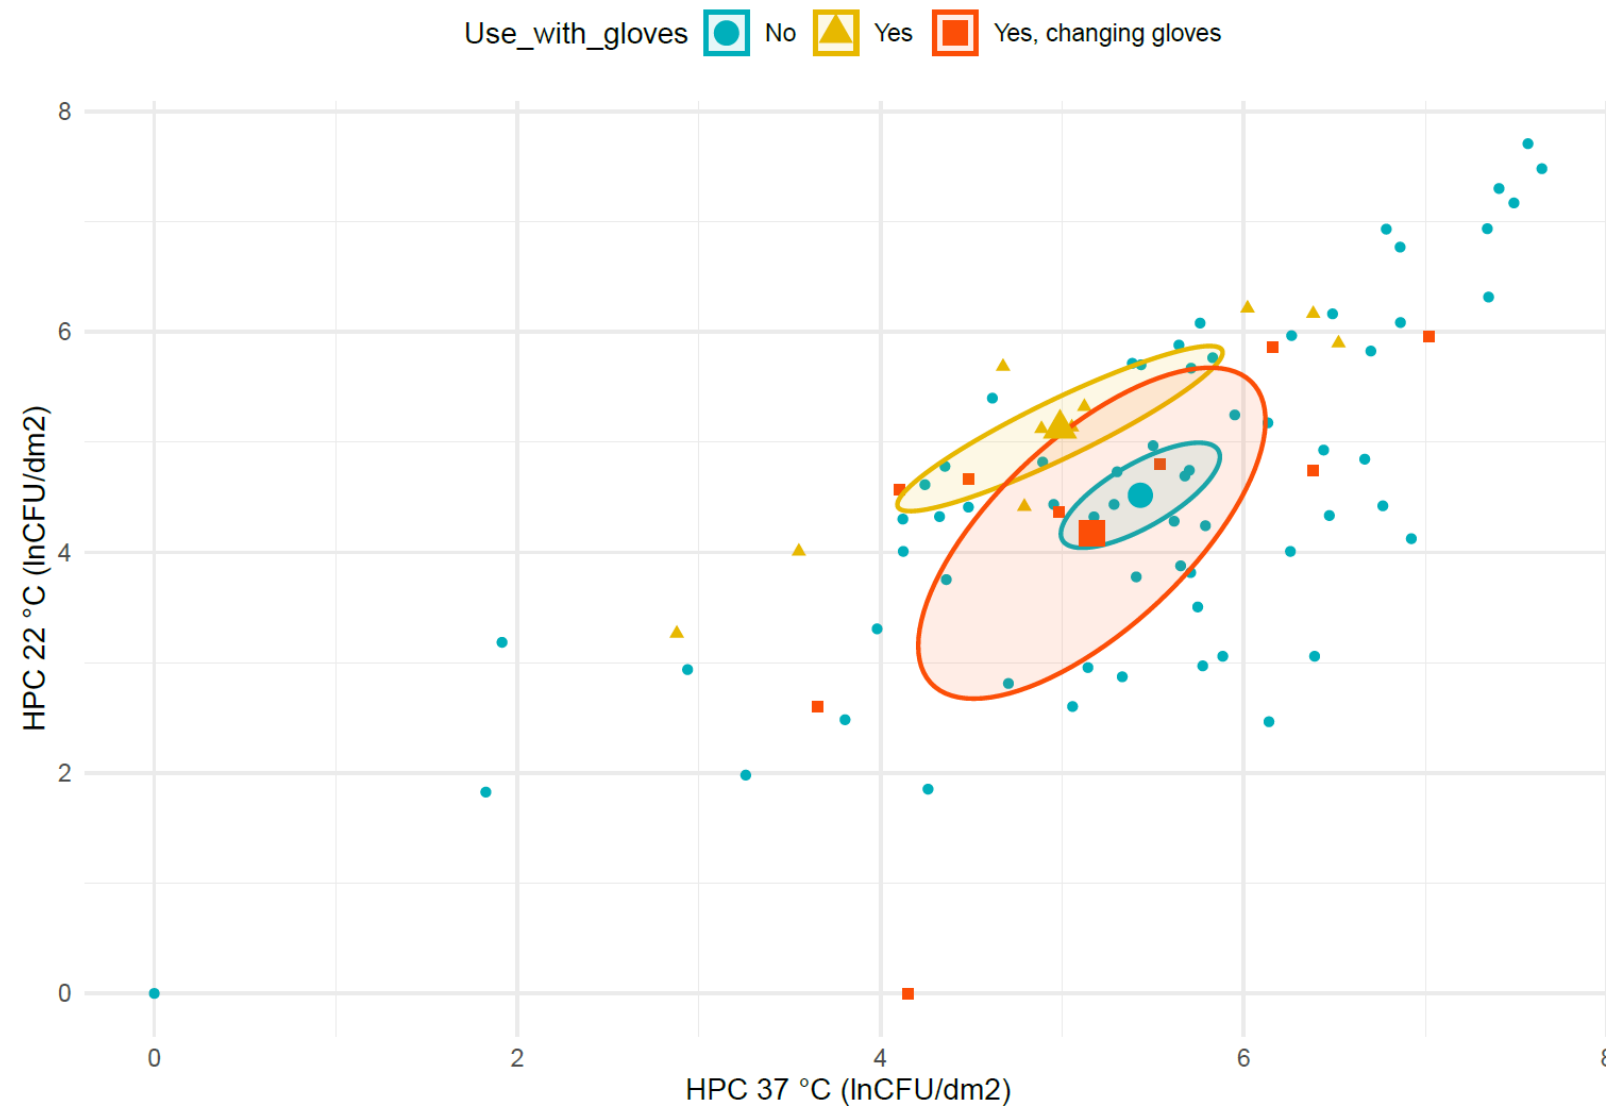

**Figure S30: HPCs 37 °C and HPCs 22 °C based on Usual mean of transport**

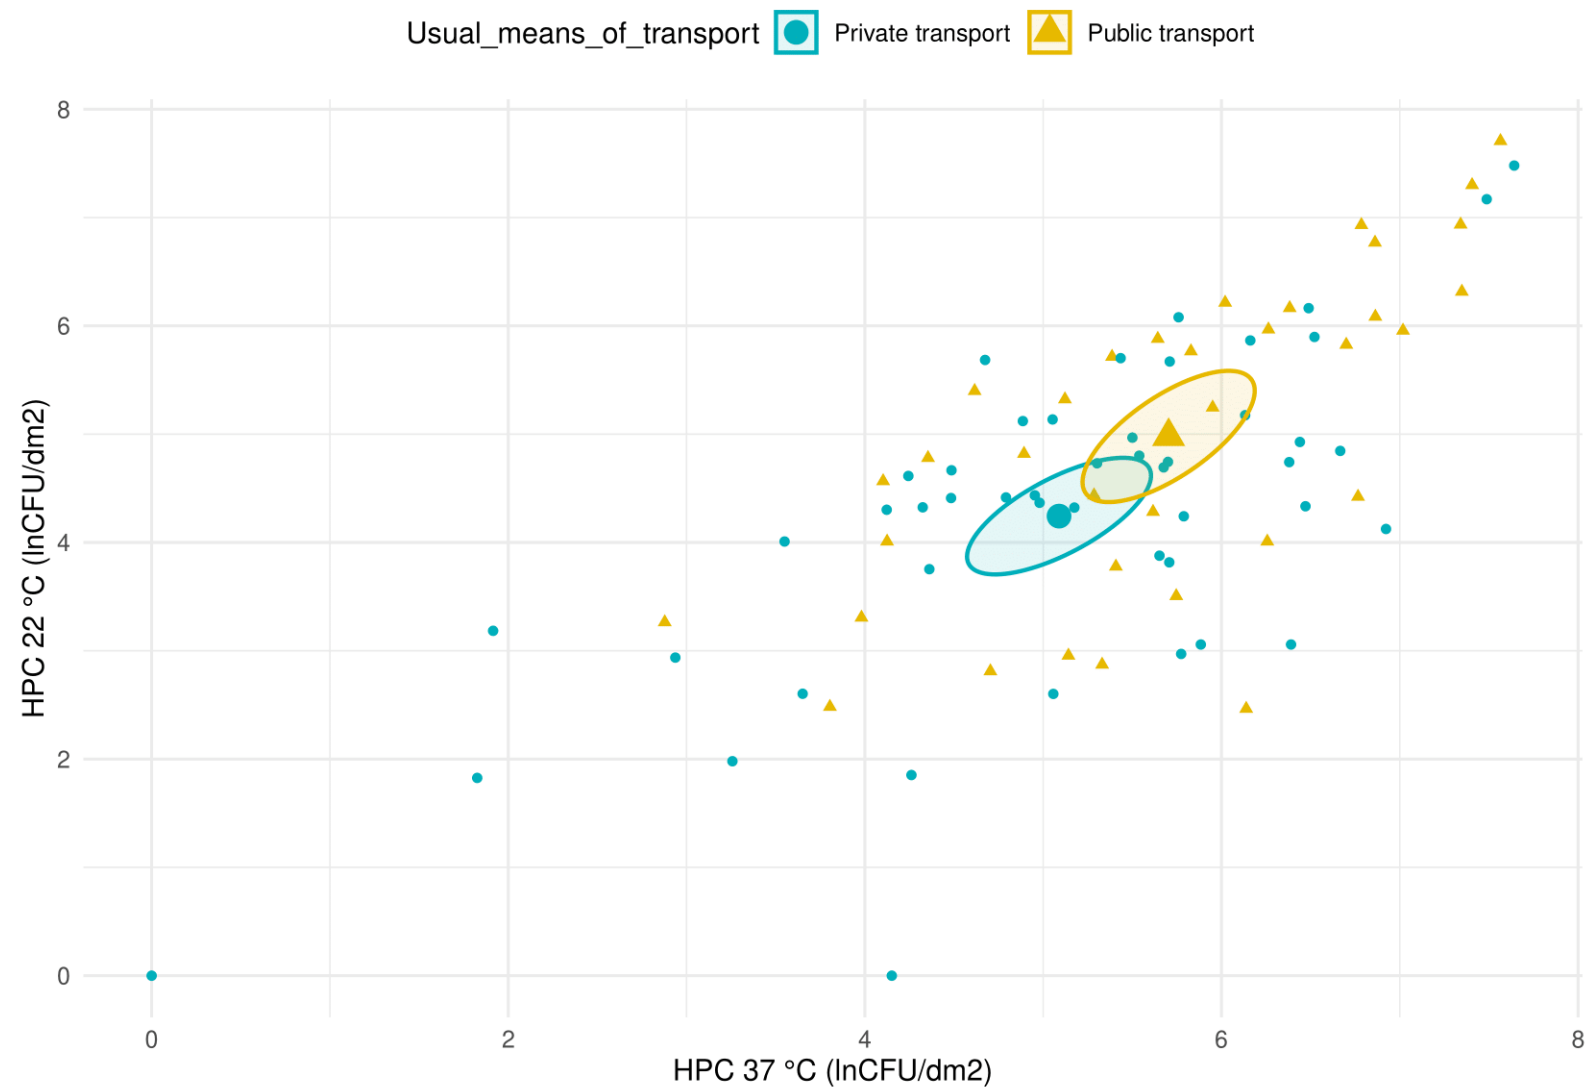

## Scatter Plots comparing mean Staphylococci and Enterococci charges across the selected variables

Figure S31: mean Staphylococci and Enterococci charges based on Age

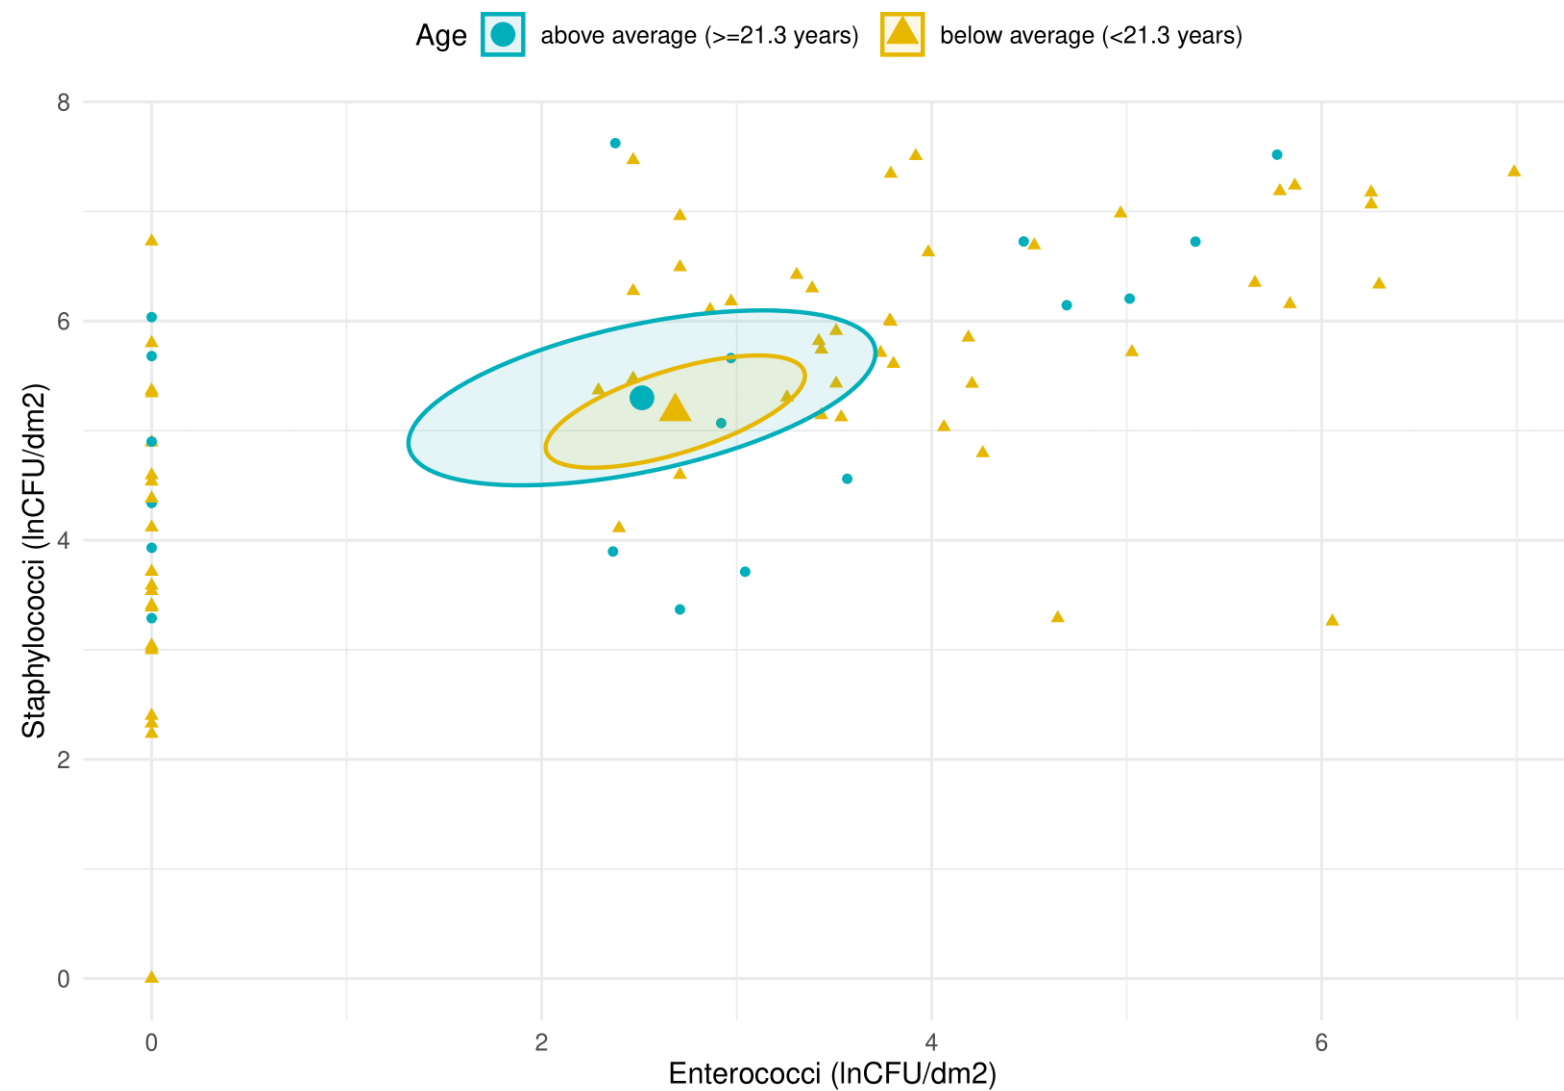

**Figure S32: mean Staphylococci and Enterococci charges based on Cleaning frequency**

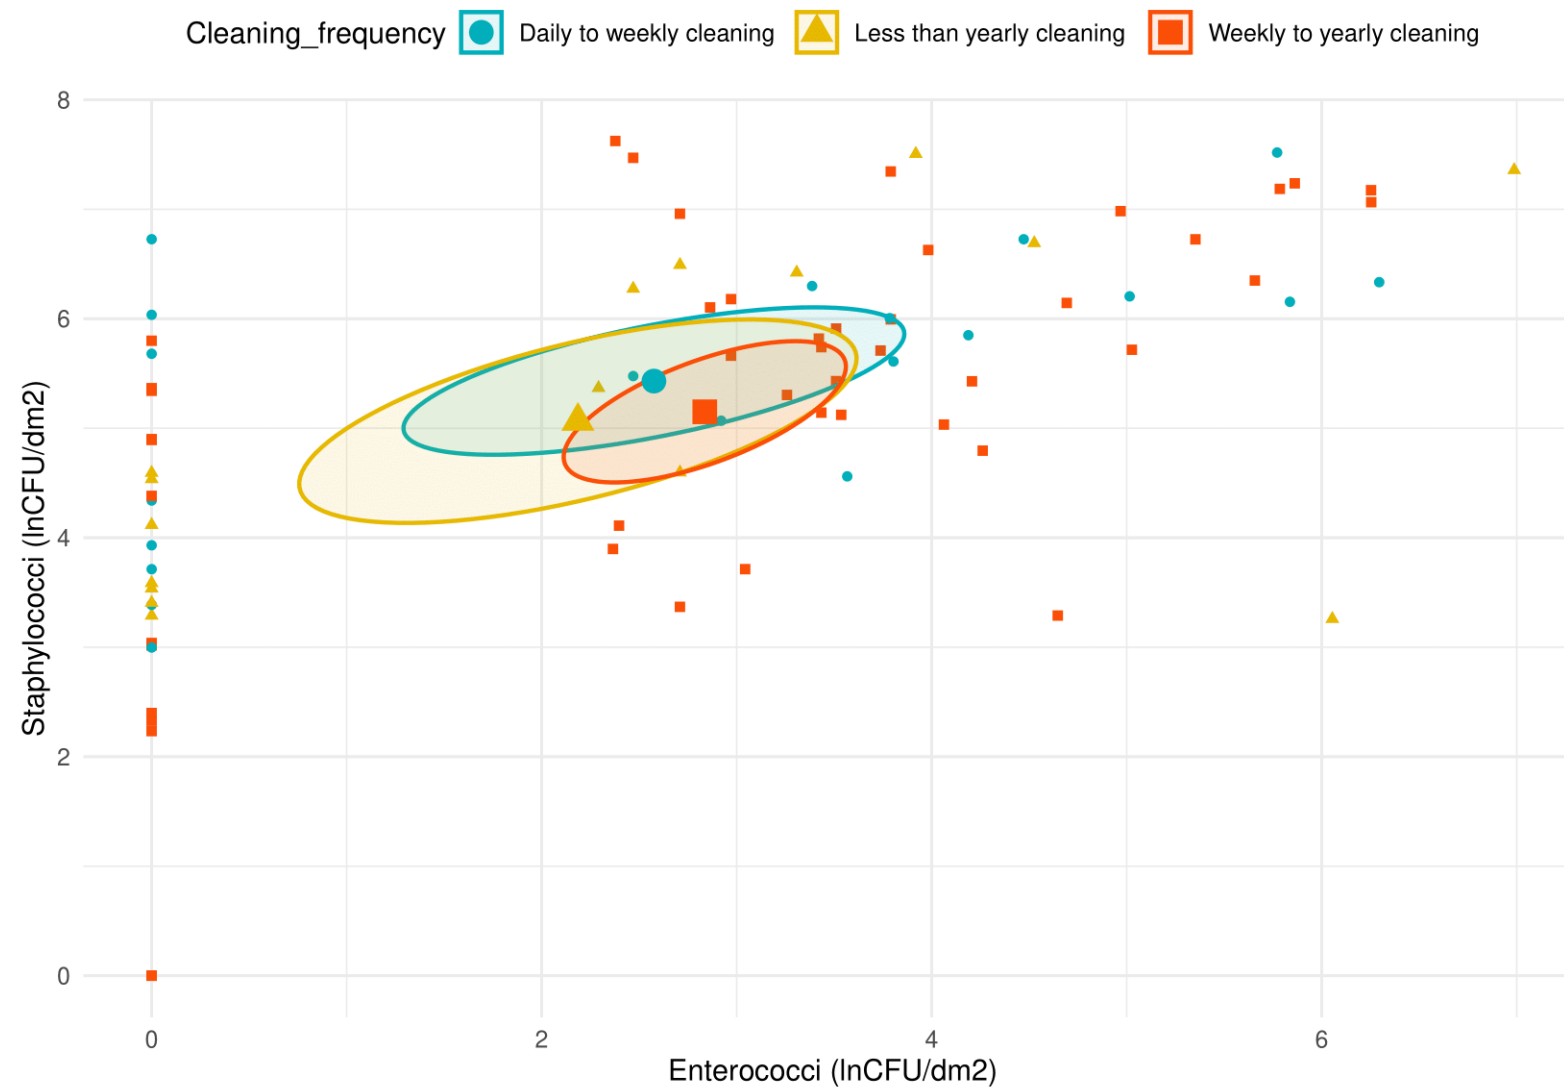



**Figure S33: mean Staphylococci and Enterococci charges based on Cleaning method**

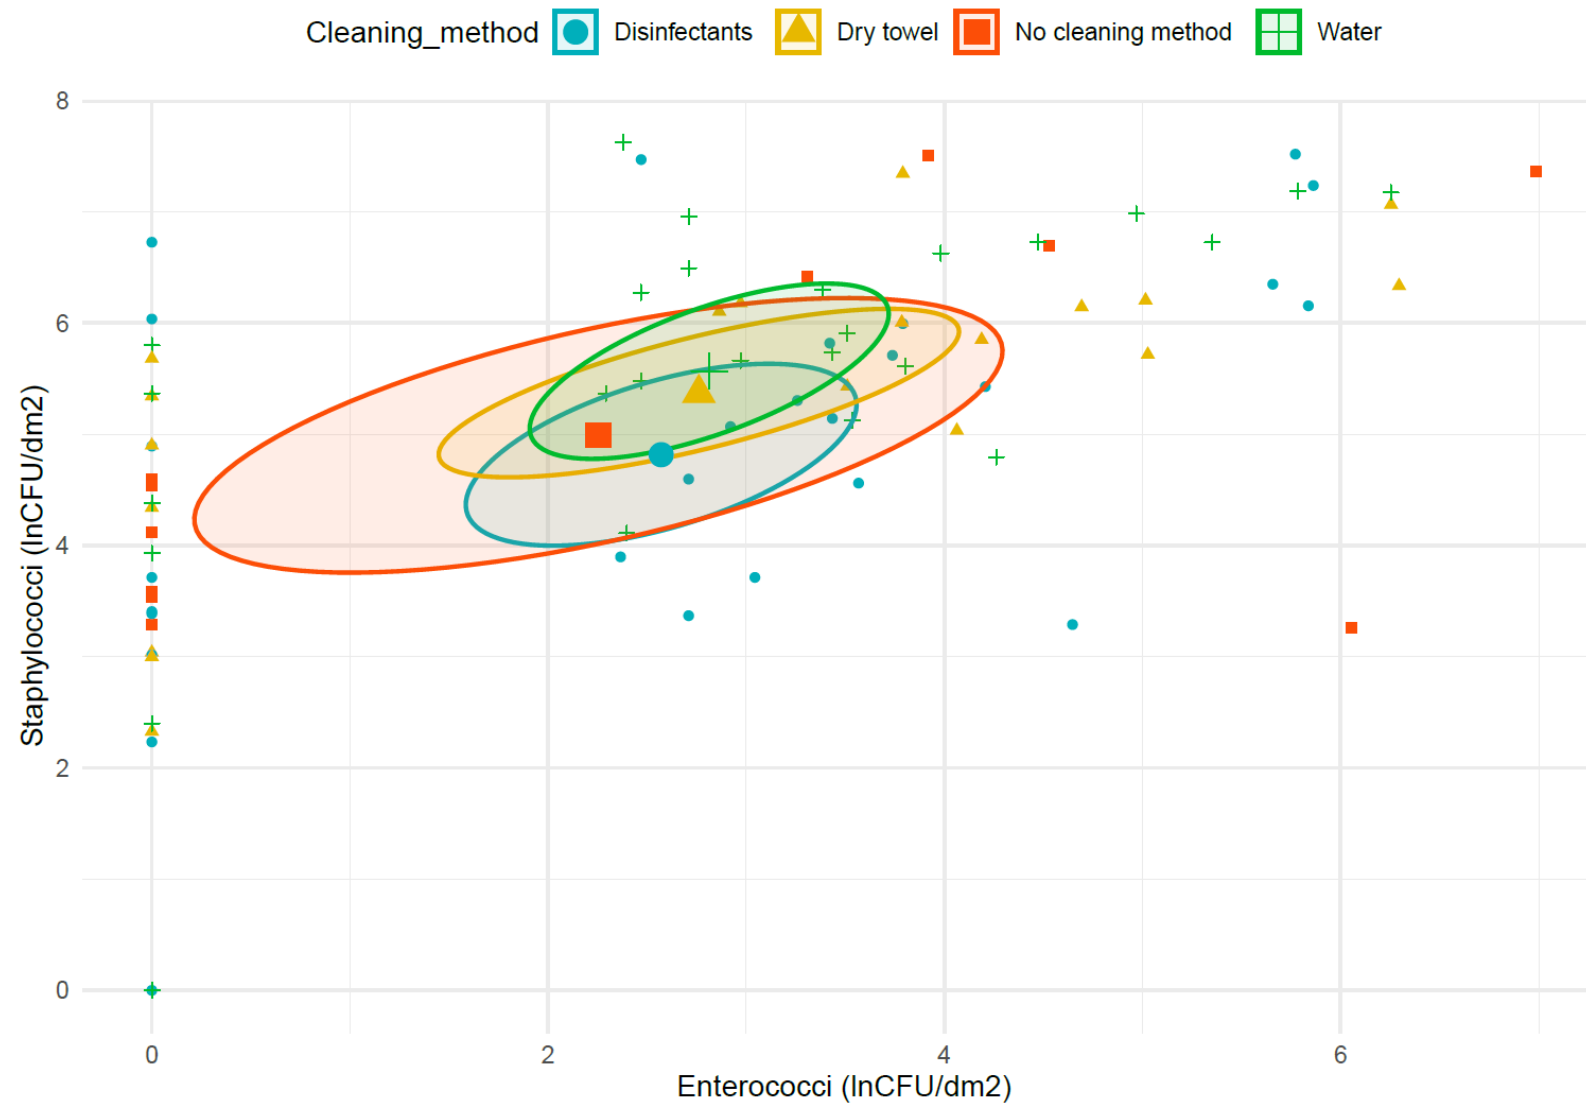

**Figure S34: mean Staphylococci and Enterococci charges based on Cover type**

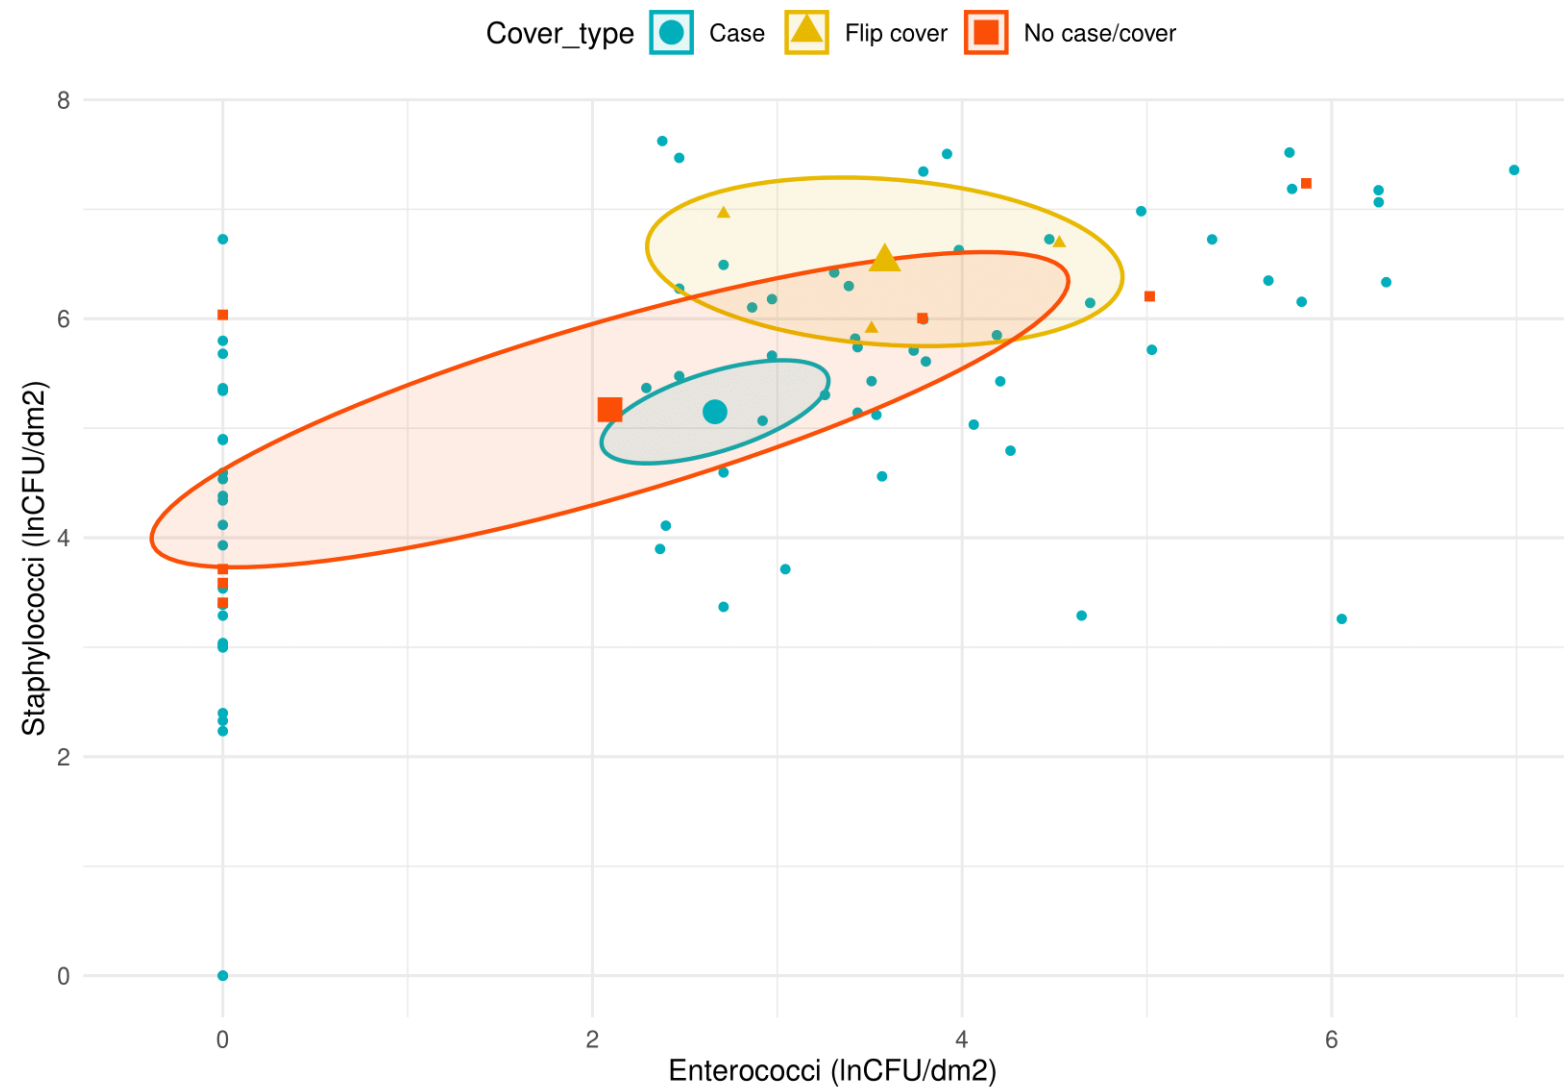

**Figure S35: mean Staphylococci and Enterococci charges based on European Head SAR**

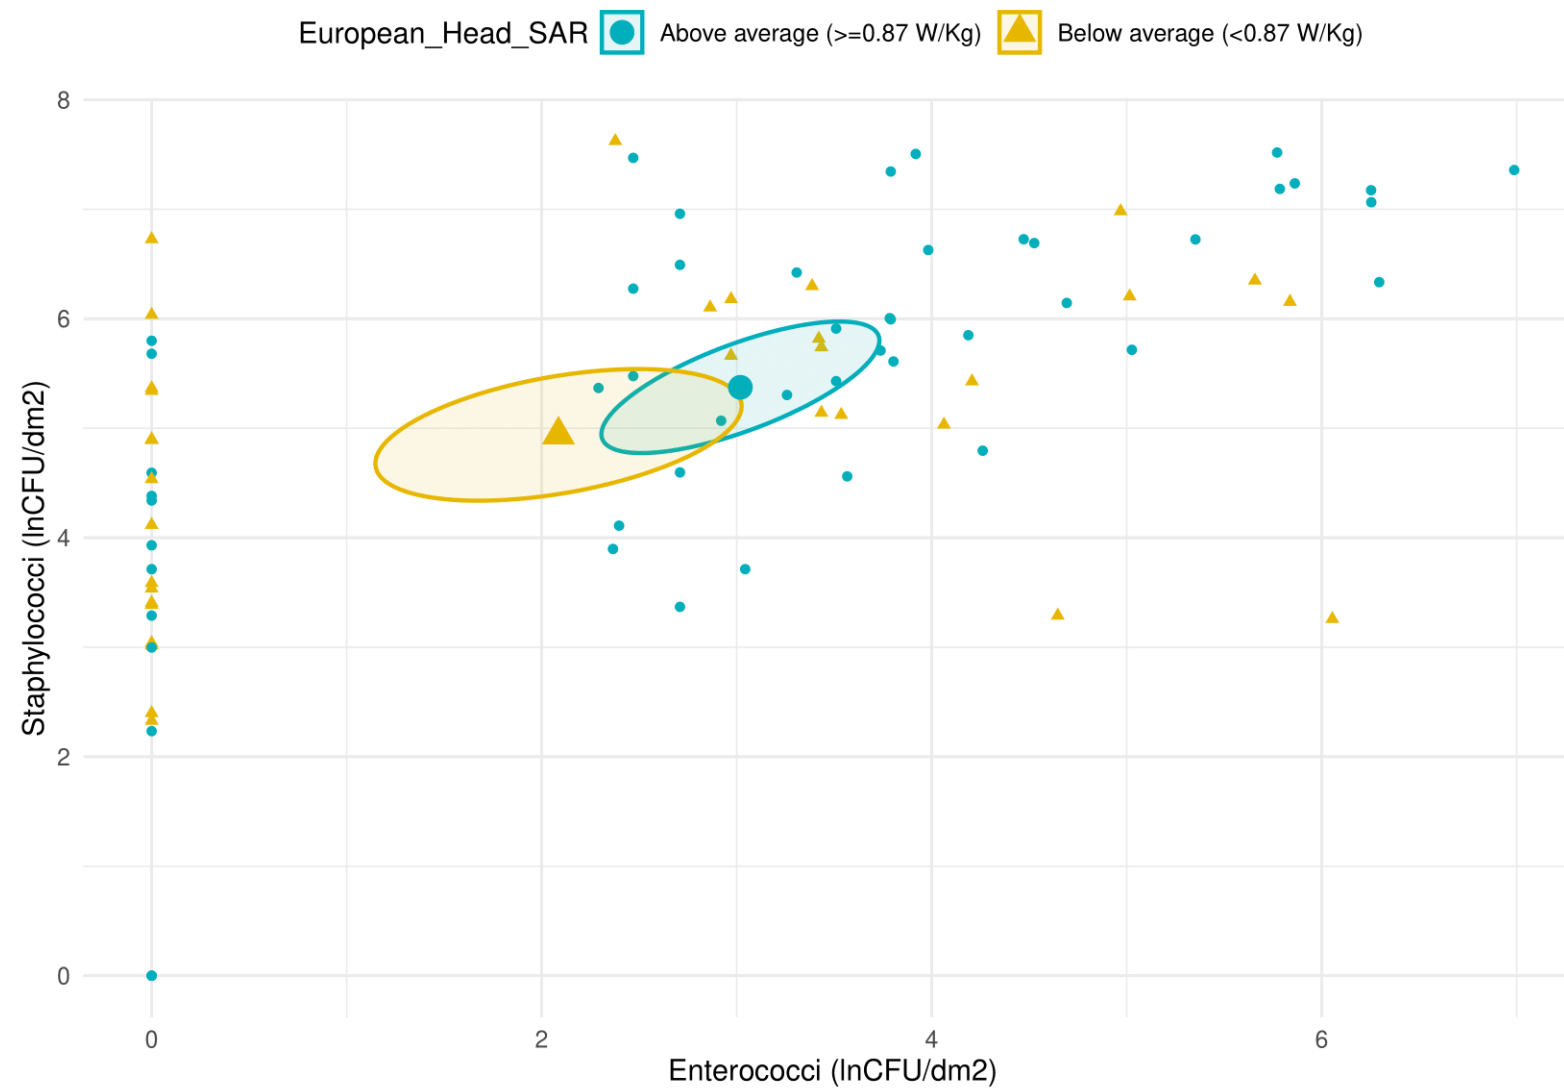

**Figure S36: mean Staphylococci and Enterococci charges based on Gender**

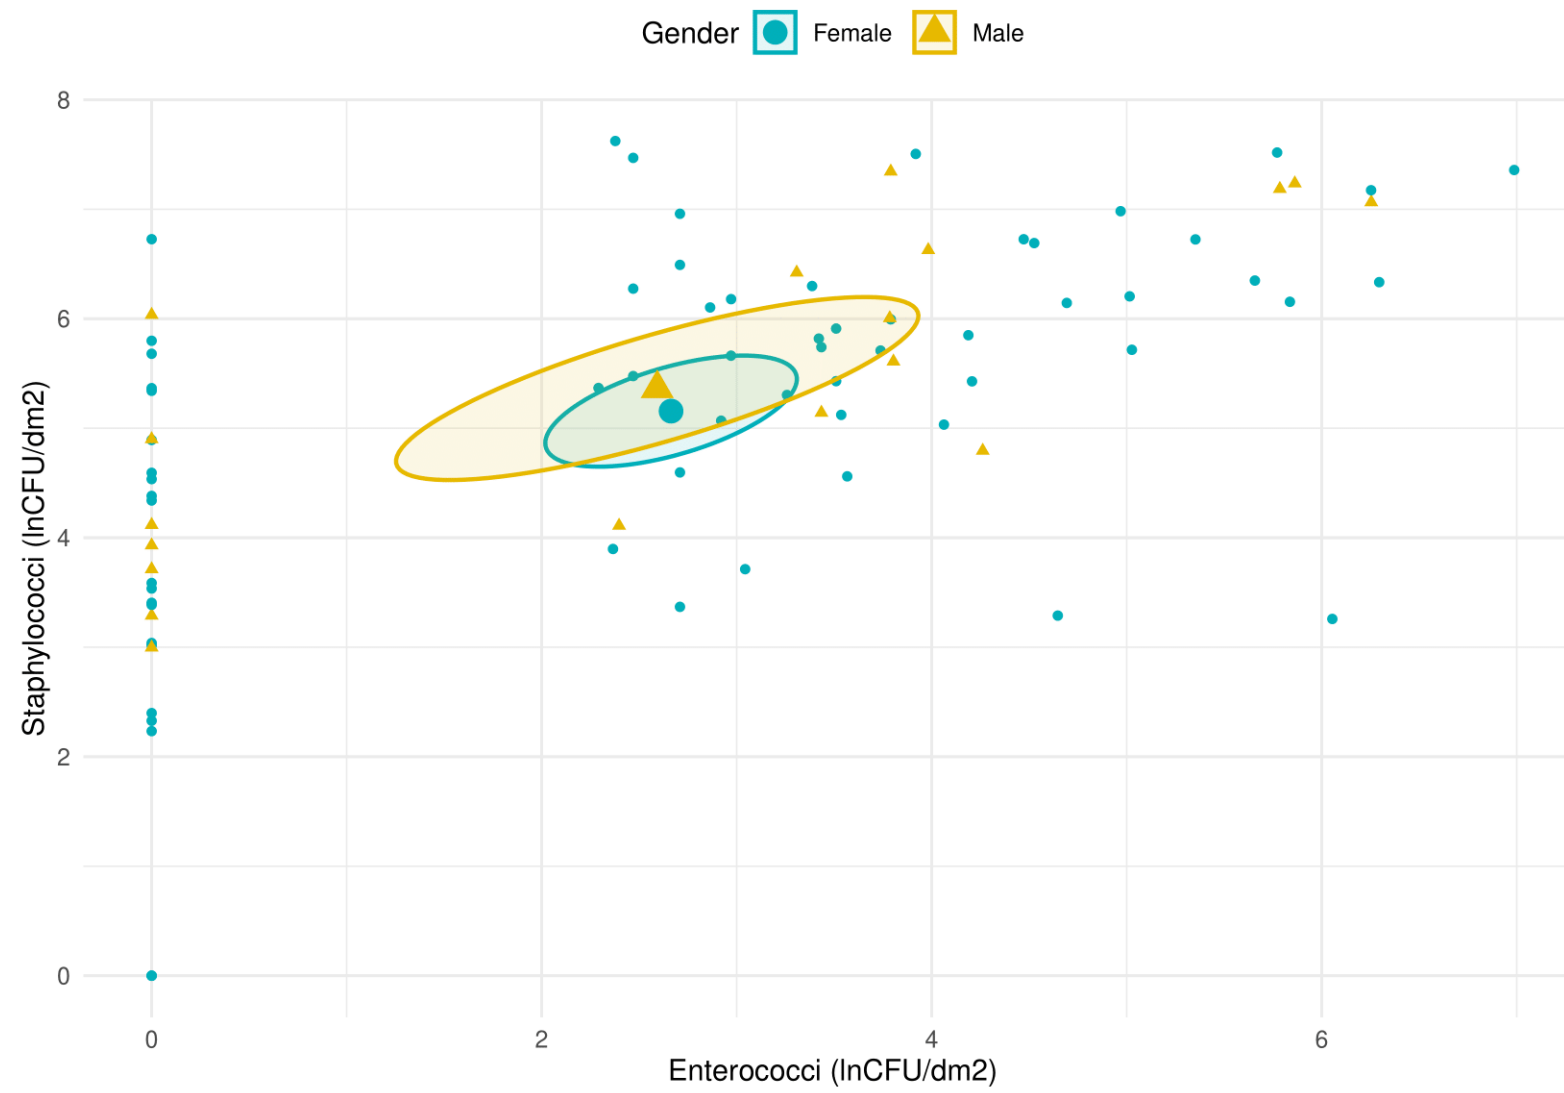

**Figure S37: mean Staphylococci and Enterococci charges based on Health Status**

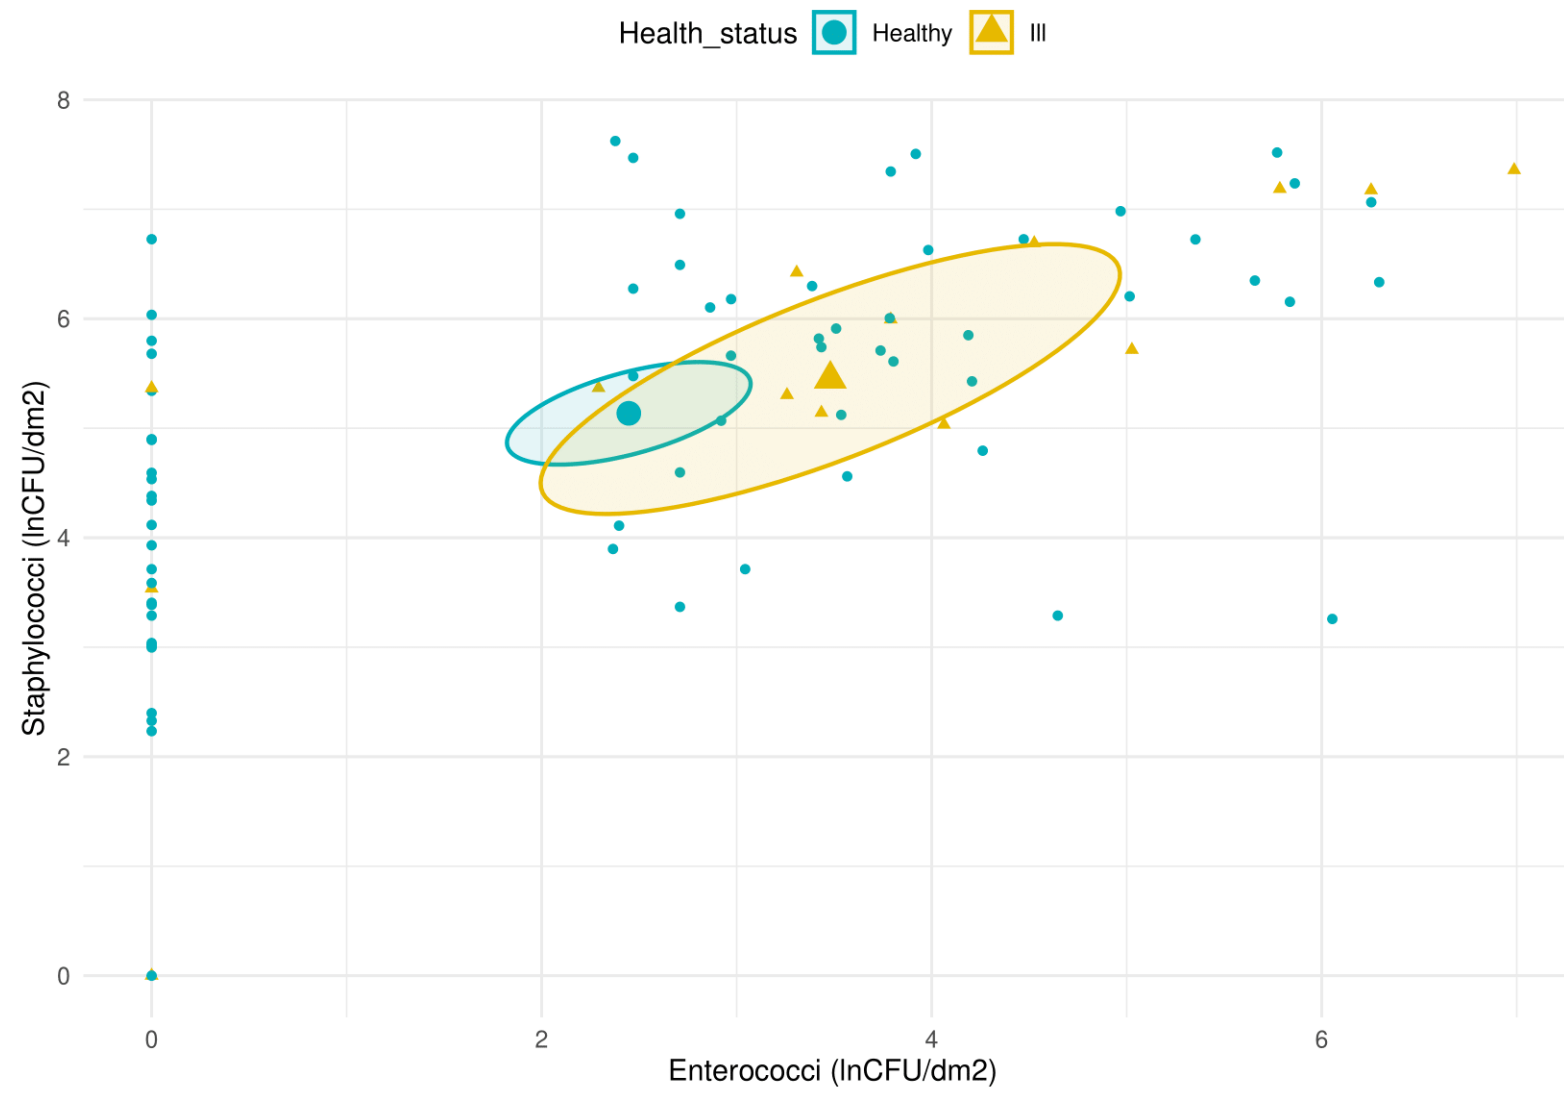

**Figure S38: mean Staphylococci and Enterococci charges based on Last Cleaning**

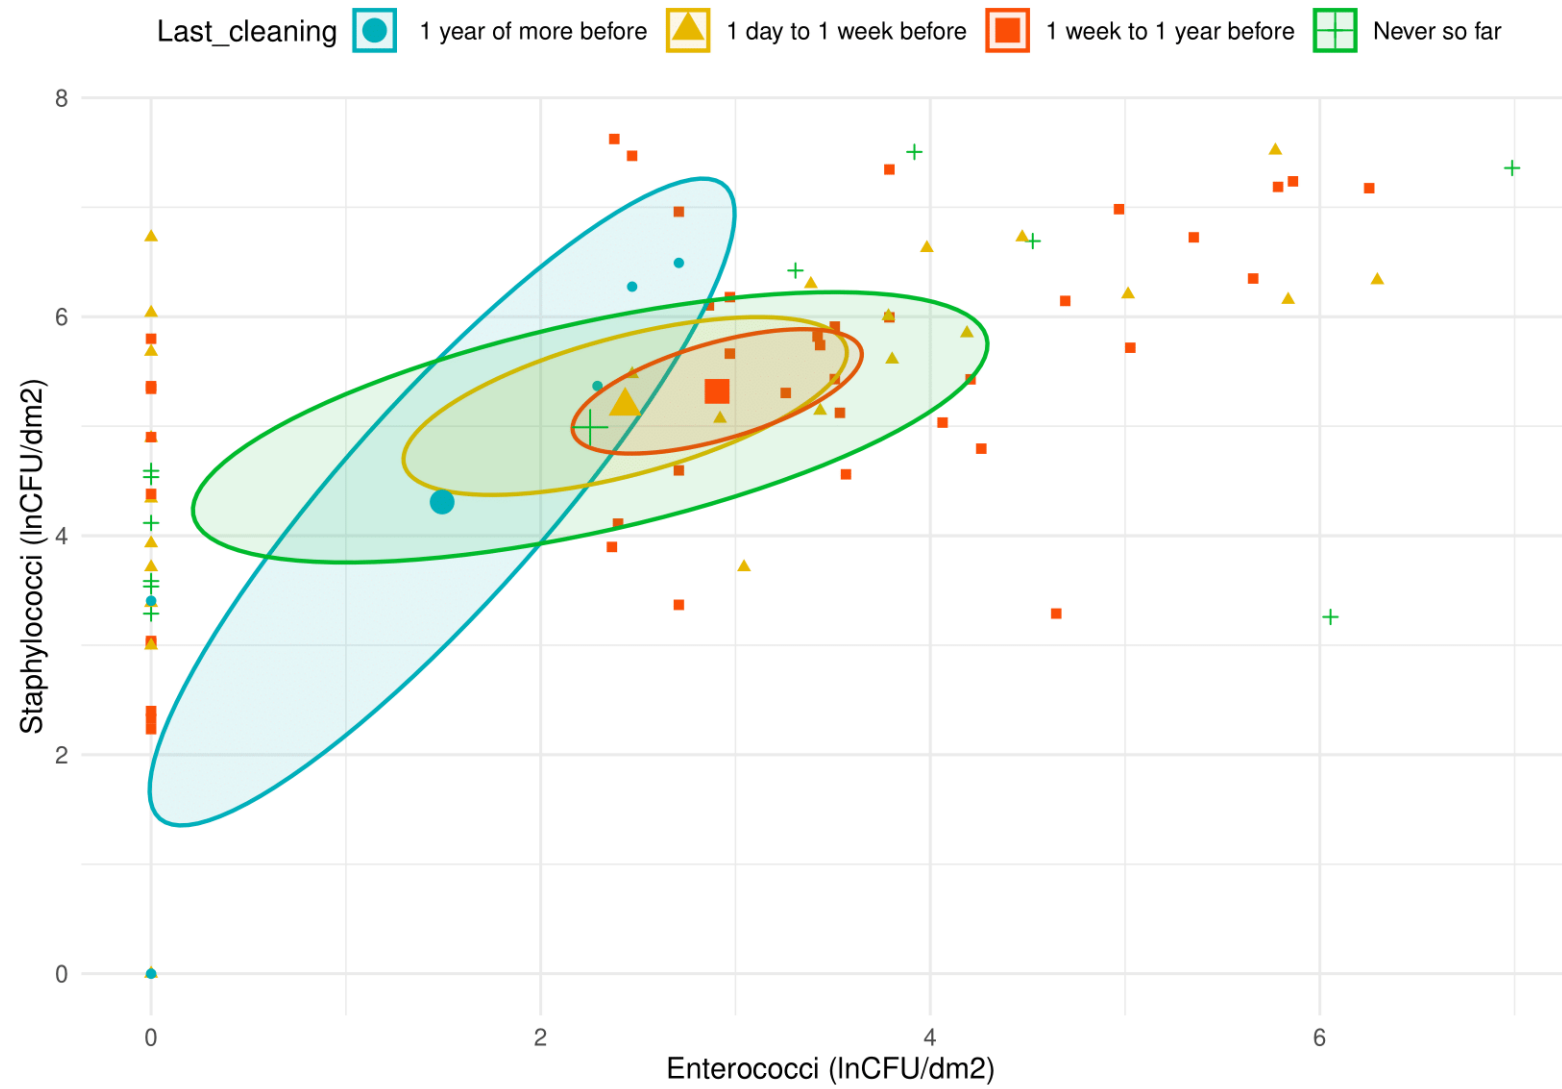

**Figure S39: mean Staphylococci and Enterococci charges based on Means of transport in the day of sampling**

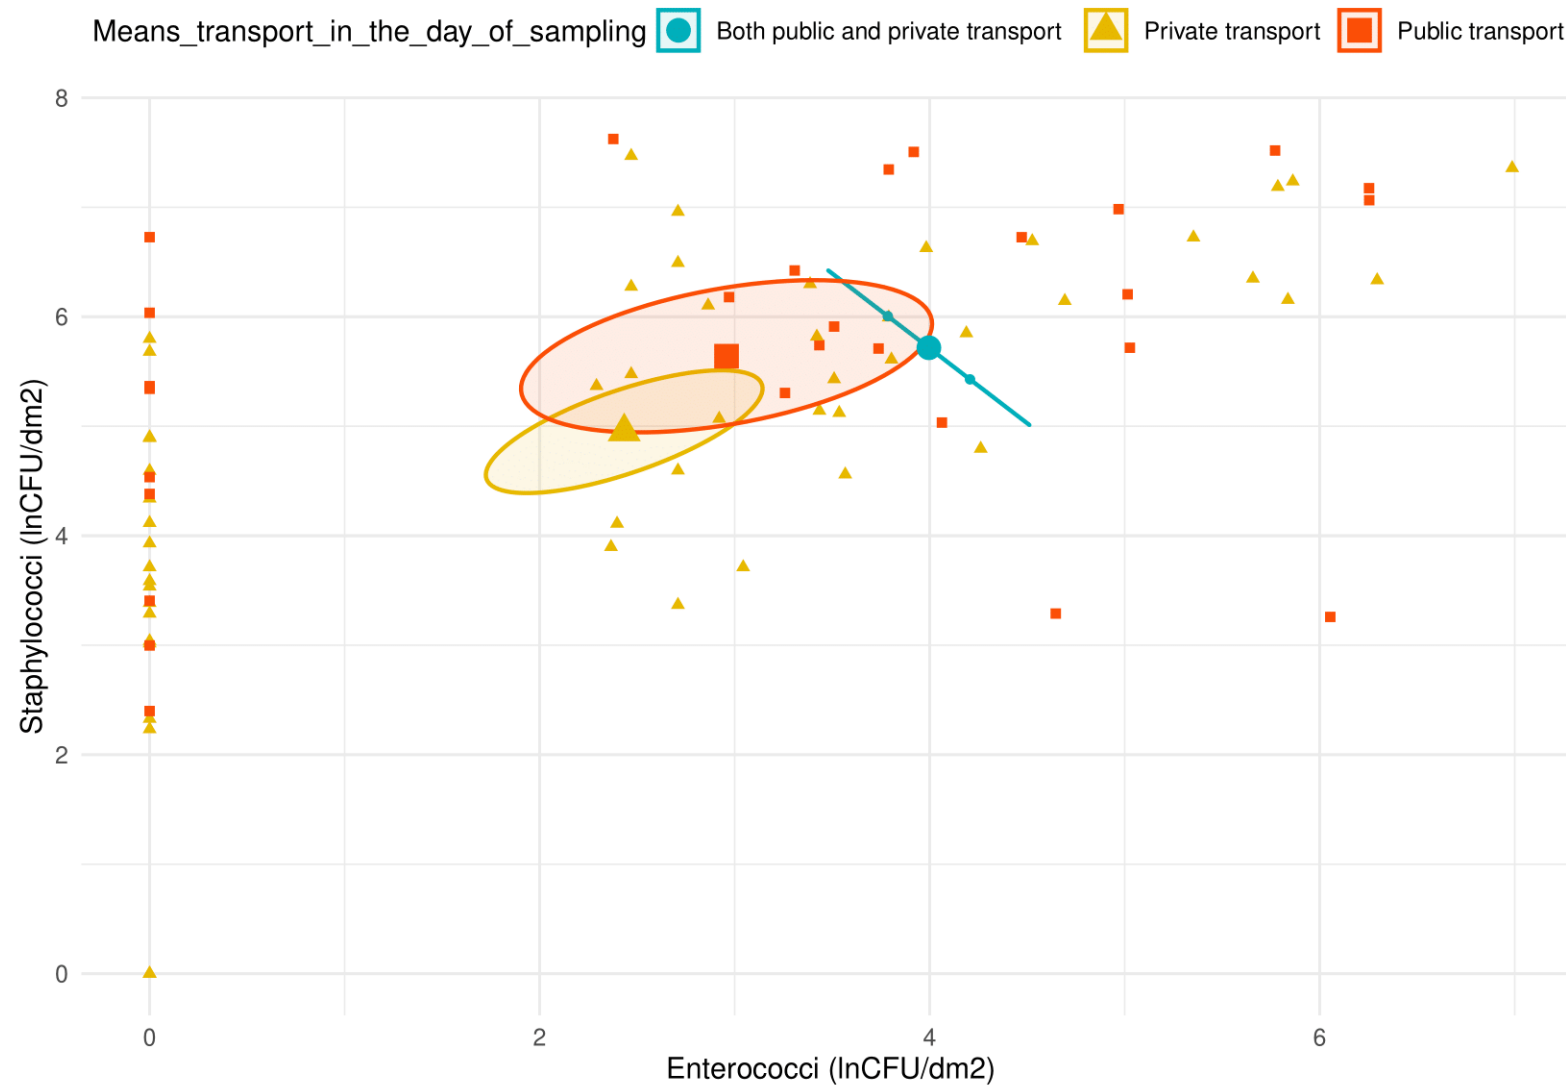

**Figure S40: mean Staphylococci and Enterococci charges based on Place of training**

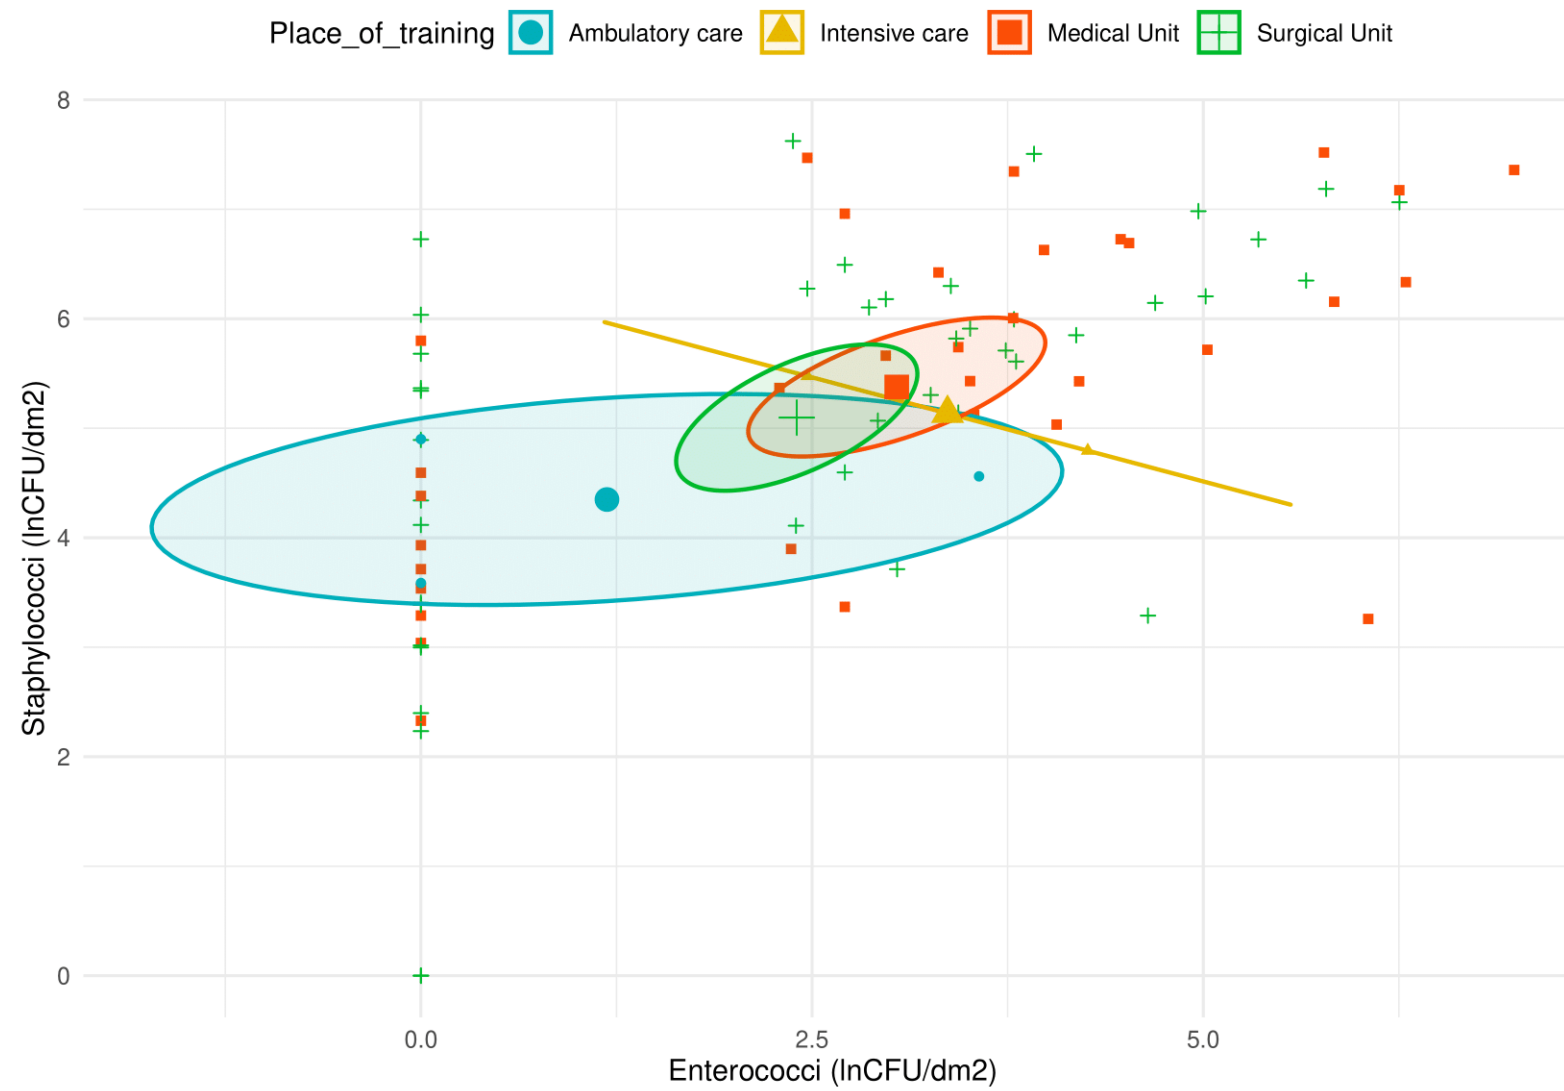



**Figure S41: mean Staphylococci and Enterococci charges based on Screen protector**

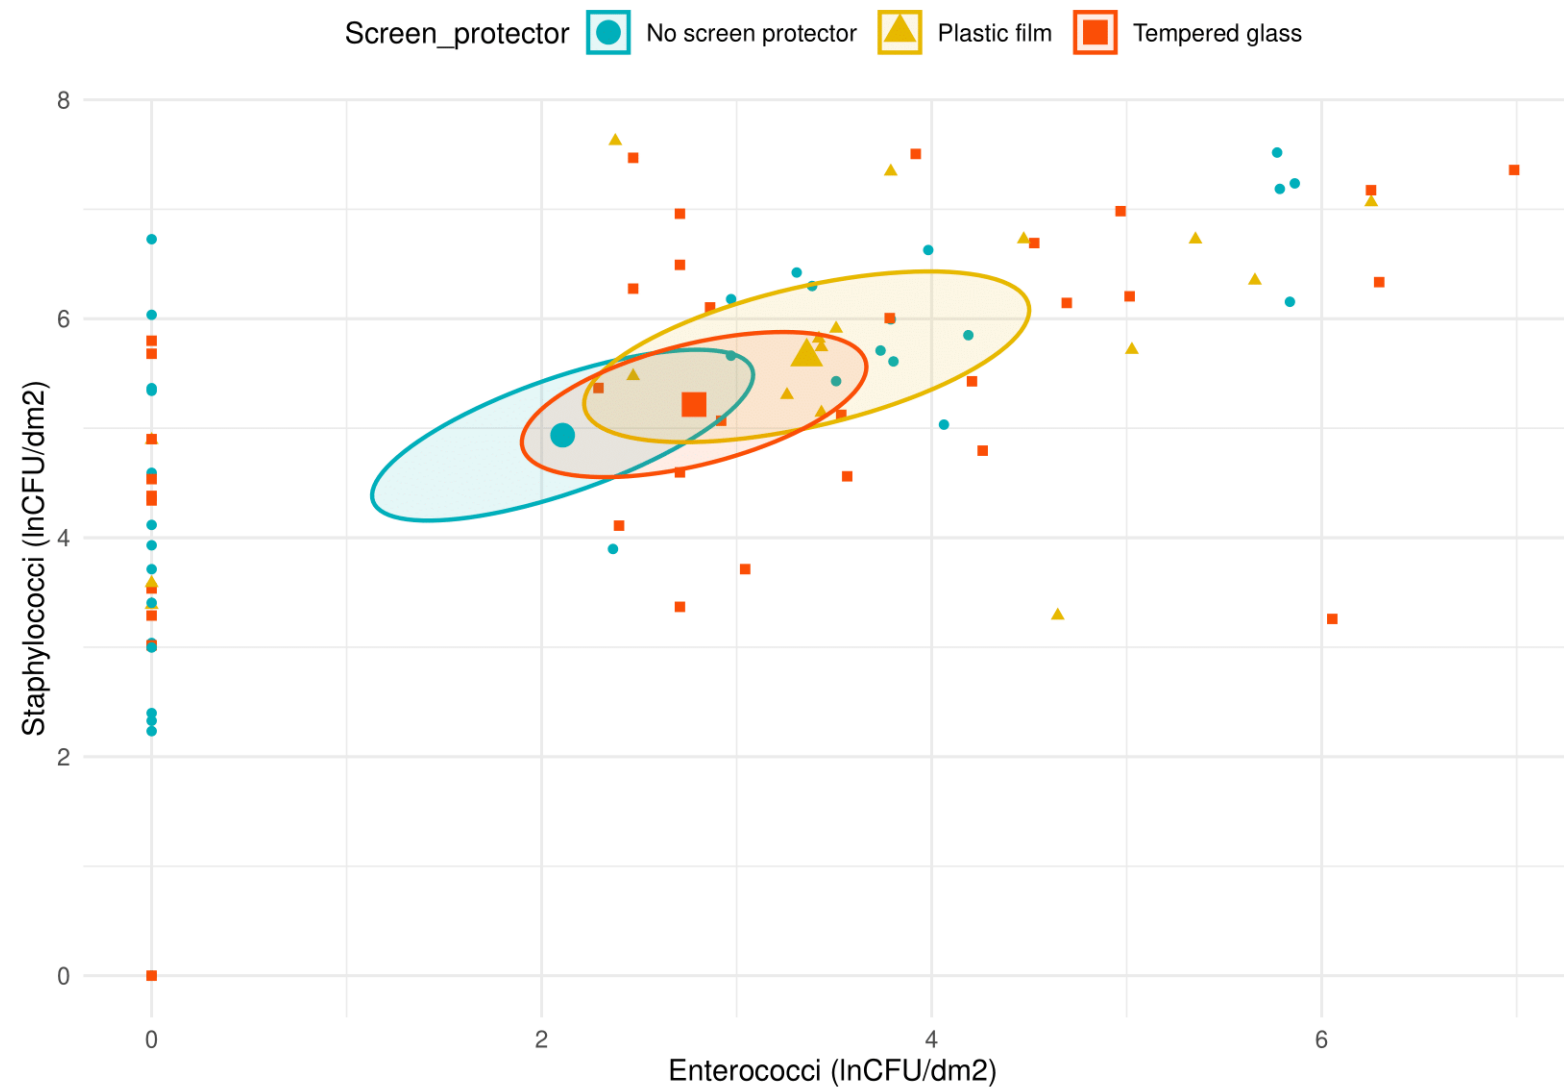

**Figure S42: mean Staphylococci and Enterococci charges based on Smartphone age**

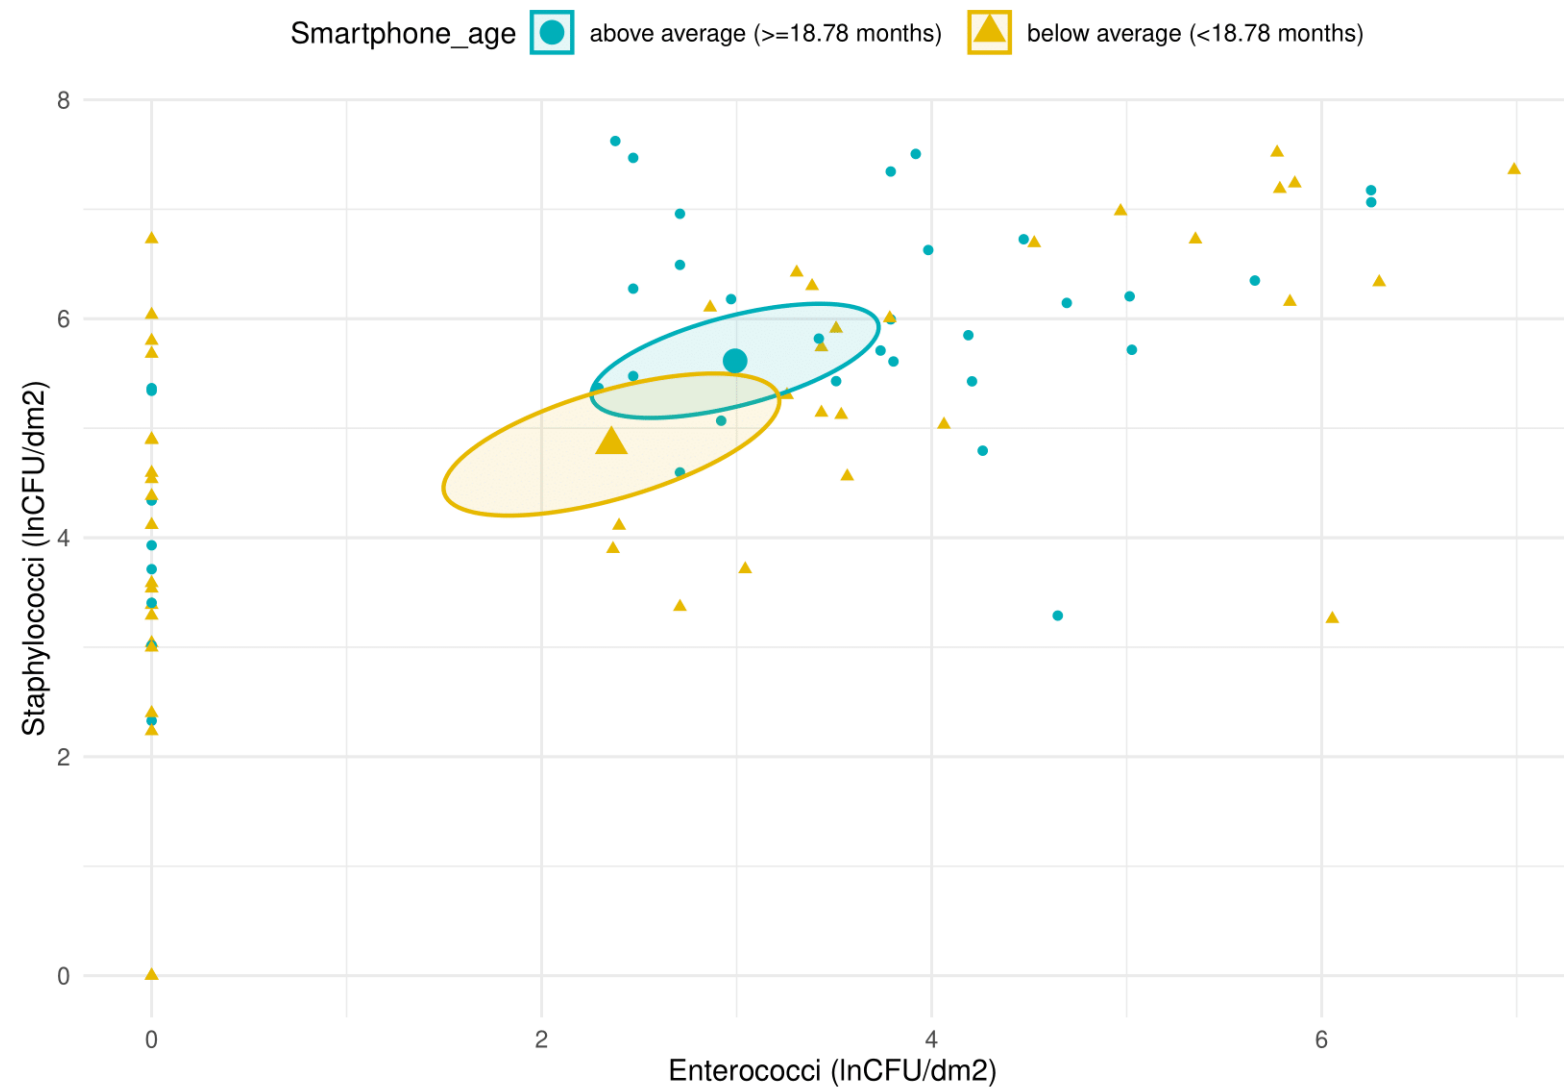

**Figure S43: mean Staphylococci and Enterococci charges based on Training frequency**

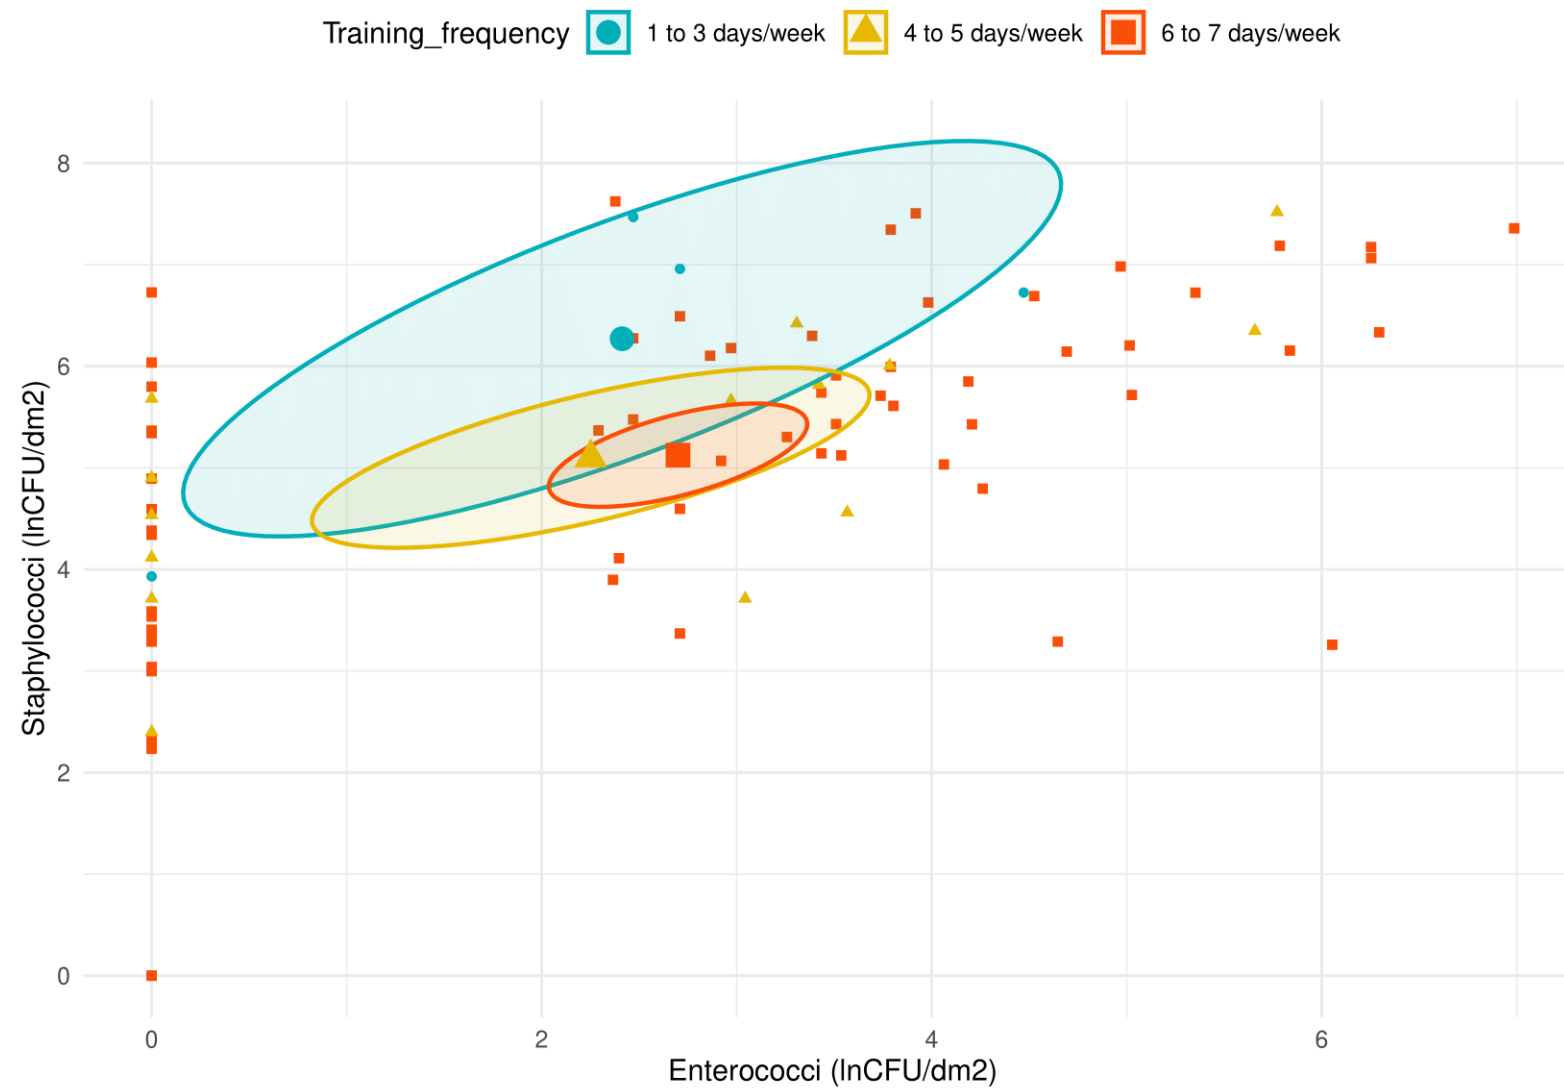

**Figure S44: mean Staphylococci and Enterococci charges based on Use with gloves**

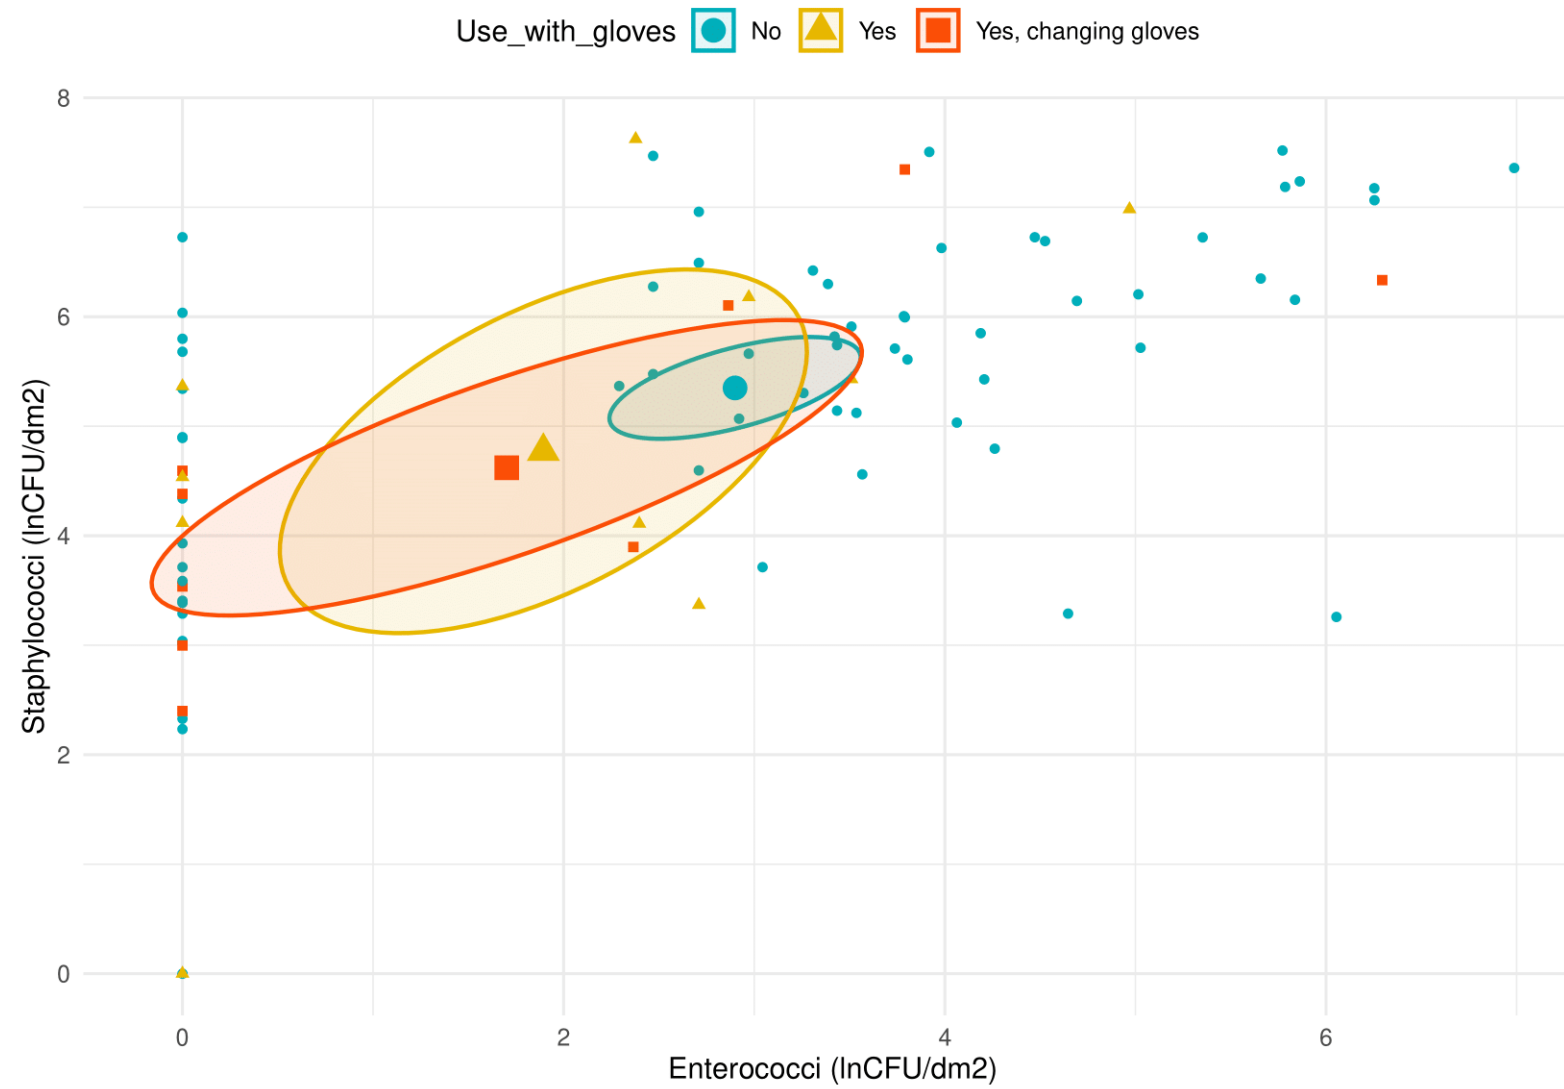

**Figure S45: mean Staphylococci and Enterococci charges based on Usual mean of transport**

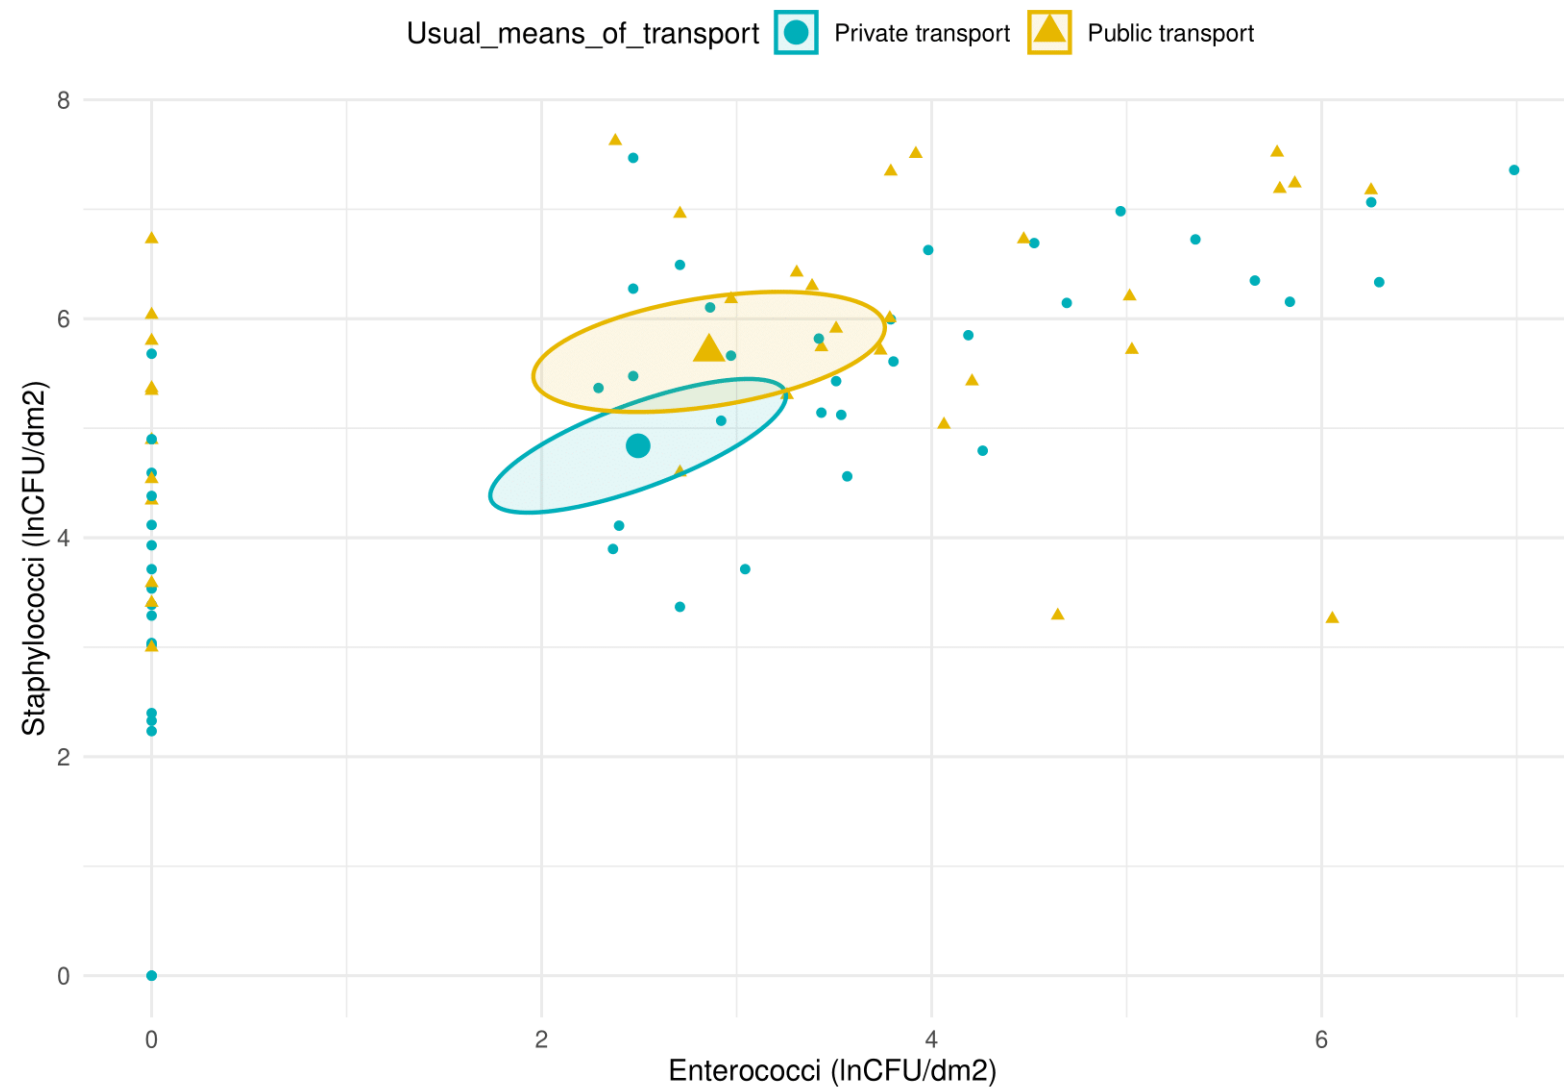

Supplement: s1 [file s1]
